# Supplementary material for: Systematic review on the primary and secondary reporting of the prevalence of ghostwriting in the medical literature
Source: PubMed Central journal article supplement — BMJ Open. 2014 Jul 12;4(7):e004777. doi: 10.1136/bmjopen-2013-004777 (PMC4120312; doi:10.1136/bmjopen-2013-004777), 2014-07-12
Supplement: bmjopen-2013-004777.draft_revisions.pdf [file bmjopen-2013-004777.draft_revisions.pdf]

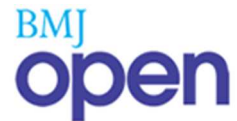

**Systematic review on the primary and secondary reporting  
of the prevalence of ghostwriting in the medical literature**

|                                 |                                          |
|---------------------------------|------------------------------------------|
| Journal:                        | <i>BMJ Open</i>                          |
| Manuscript ID:                  | bmjopen-2013-004777                      |
| Article Type:                   | Research                                 |
| Date Submitted by the Author:   | 02-Jan-2014                              |
| Complete List of Authors:       | Stretton, Serina; ProScribe,             |
| <b>Primary Subject Heading</b>: | Medical publishing and peer review       |
| Secondary Subject Heading:      | Ethics                                   |
| Keywords:                       | MEDICAL ETHICS, Ghostwriting, Authorship |
|                                 |                                          |

SCHOLARONE™  
Manuscripts

Review only

**TITLE**

Systematic review on the primary and secondary reporting of the prevalence of ghostwriting in the medical literature

**AUTHOR**

Serina Stretton, PhD CMPP

**AUTHOR'S AFFILIATION**

ProScribe Medical Communications, Noosaville, Queensland, Australia

**AUTHOR FOR CORRESPONDENCE**

Serina Stretton, PhD, CMPP

ProScribe Medical Communications

18 Poulet St

Matrville, NSW, 2036

AUSTRALIA

Tel: + 612 9661 0768

Fax: + 612 9661 0766

Email: [ss@proscribe.com.au](mailto:ss@proscribe.com.au)

**KEYWORDS**

Authorship, ghostwriting, systematic review

**WORD COUNT**

3,441

## ABSTRACT

**Background:** Ghostwriting of industry-sponsored articles is unethical and is perceived to be common practice in the medical literature.

**Objective:** The conduct a systematic review on how evidence for the prevalence of ghostwriting is reported in the medical literature.

**Data sources:** MEDLINE via PubMed 1966+, EMBASE 1966+, The Cochrane Library 1988+, Medical Writing 1998+, The AMWA Journal 1986+, Council of Science Editors Annual Meetings 2007+, and the Peer Review Congress 1994+ were searched electronically (23 May 2013) using the search terms ghostwrit\*, ghostauthor\*, ghost AND writ\*, ghost AND author\*.

**Eligibility criteria:** All publication types were considered; only publications reporting a numerical estimate of possible ghostwriting prevalence were included.

**Data extraction:** Two independent reviewers screened the publications; discrepancies were resolved by consensus. Data to be collected included a numerical estimate of the prevalence of possible ghostwriting (primary outcome measure), definitions of ghostwriting reported, source of the reported prevalence, publication type and year, study design, and sample population.

**Results:** Of the 848 publications retrieved and screened for eligibility, 48 reported numerical estimates for the prevalence of possible ghostwriting and were analyzed further. Sixteen primary publications reported findings from cross-sectional surveys or descriptive analyses of published articles and 32 secondary publications cited published or unpublished evidence. Estimates on the prevalence of possible ghostwriting in primary and secondary publications varied markedly. Estimates were influenced by the definition of ghostwriting used, the type of population or sample assessed, and whether evidence from primary publications was cited correctly or appropriately.

**Conclusions:** Estimates of ghostwriting reported in the medical literature can be outdated, misleading, or mistaken. Researchers should not inflate estimates using nonstandard definitions

1  
2  
3  
4  
5  
6  
7  
8  
9  
10  
11  
12  
13  
14  
15  
16  
17  
18  
19  
20  
21  
22  
23  
24  
25  
26  
27  
28  
29  
30  
31  
32  
33  
34  
35  
36  
37  
38  
39  
40  
41  
42  
43  
44  
45  
46  
47  
48  
49  
50  
51  
52  
53  
54  
55  
56  
57  
58  
59  
60

of ghostwriting nor conflate ghostwriting with other unethical authorship practices. Editors and peer reviewers should not accept articles that incorrectly cite or interpret primary publications that report the prevalence of ghostwriting.

For peer review only

## MAIN STRENGTHS AND LIMITATIONS

### Strengths

- First systematic review on the reporting of the prevalence of ghostwriting in the medical literature
- Abroad search strategy was employed with few restrictions to minimize any potential for publication or language bias; there were no restrictions on language.
- All study designs and publication types were considered

### Limitations

- Study heterogeneity in the outcomes reported and populations investigated precluded synthesis of the data
- Retrospective and self-reported nature of the data collection resulted increased the risk of selection bias in the studies
- Most included studies were not broadly representative of the peer-reviewed medical literature

## INTRODUCTION

Ghostwriting of peer-reviewed journal publications in the medical literature is believed to be common practice.[1-3] This belief is supported, to a large extent, by highly publicized cases, primarily from the 1990s and early 2000s, of pharmaceutical companies and authors who had used ghostwriters to prepare manuscripts for publication in medical journals.[4-6] Such cases are highly unethical because the role of the commercial sponsor and any other potential conflicts of interest were hidden.

Ghostwriting occurs when writing contributions to a manuscript that do not meet authorship criteria are not disclosed in the acknowledgments. This practice is distinct from ghost authoring, where contributions to a manuscript that do merit authorship are not disclosed in the author byline.[7] However, part of the challenge in understanding the prevalence of ghostwriting is the current confusion surrounding the two unethical practices. For example, the widely used Council of Science Editors definition of ghost authors (ie, individuals who participate in research, data analysis, and/or writing of a manuscript but are not named or disclosed in the author byline or acknowledgments) does not distinguish between ghost authors and ghostwriters.[8] Estimating the prevalence of ghostwriting has also been hindered by the failure of authors to distinguish ghostwriting, which is unethical, from professional medical writing support, which is ethical.[9, 10] Ghostwriters keep their involvement in a manuscript hidden, whereas professional medical writers disclose their involvement and follow ethical publication practices.[7, 9-11] The prevalence of disclosed professional medical writing assistance in medical journals has been estimated to be between 6.0% and 11.0%[10, 12] and the legitimate value that this medical writing assistance can bring to improving the quality, timeliness, and integrity of reporting in medical journals has been demonstrated.[7, 13, 14] However, the exact prevalence of

1  
2  
3 ghostwriting and other forms of undisclosed contributions to papers published in medical  
4  
5 journals is unknown.  
6  
7  
8

9  
10 The primary objective of this study was to conduct the first systematic review on how the  
11 prevalence of ghostwriting is reported in the medical literature. The secondary objectives were  
12 to assess the variability of the reported estimates of the prevalence of ghostwriting and  
13 investigate the source for these estimates.  
14  
15  
16  
17  
18  
19  
20  
21

## 22 **MATERIALS AND METHODS**

### 23 **Literature search strategy**

24  
25  
26  
27 A search strategy was developed to retrieve publications from the medical literature that  
28 reported quantitative estimates of the prevalence of ghostwriting. The following databases were  
29 searched on 23 May 2013: MEDLINE via PubMed (1966+); EMBASE (1966+); The Cochrane  
30 Library, including the Cochrane Database of Systematic Reviews and Cochrane Central  
31 Register of Controlled Trials (1988+); The AMWA Journal (1986+, journal of the American  
32 Medical Writers Association); Medical Writing (1998+, journal of the European Medical Writers  
33 Association, formerly known as The Write Stuff); Council of Science Editors annual meetings  
34 (2007+); and the International Congress on Peer Review and Biomedical Publication meetings  
35 (1994+). General text was searched using the following search terms: ghostwrit\*, ghostauthor\*,  
36 ghost AND writ\*, ghost AND author\*. Truncation symbols and Boolean operators (AND, OR)  
37 were used wherever possible.  
38  
39  
40  
41  
42  
43  
44  
45  
46  
47  
48  
49  
50  
51  
52  
53  
54

55 Two reviewers (SS, SMG) independently screened the title and abstracts of all retrieved  
56 publications using prespecified eligibility criteria; the full text of potentially eligible publications  
57  
58  
59  
60

1  
2  
3 was screened to confirm eligibility for inclusion. Any discrepancies between the reviewers were  
4  
5 resolved by consensus. The reference lists of relevant reviews and other publications were  
6  
7 screened by hand to identify any additional publications for inclusion.  
8  
9

### 10 11 **Eligibility criteria**

12  
13 Publications were included if they reported a numerical estimate of the prevalence of possible  
14  
15 ghostwriting. Publications were excluded if they were duplicate publications from different  
16  
17 databases or abstracts of subsequently published full-text articles, did not report any outcomes  
18  
19 related to ghostwriting, or reported qualitative estimate(s) of the prevalence of possible  
20  
21 ghostwriting. No restrictions on language were included in the eligibility criteria.  
22  
23  
24

### 25 26 27 **Data extraction and analysis**

28  
29 Data to be collected were prespecified and included publication type and year, study design and  
30  
31 sample population, definitions of ghostwriting reported, reported prevalence of possible  
32  
33 ghostwriting, and the source of the reported prevalence of ghostwriting.  
34  
35  
36

37  
38 The primary outcome measure for the systematic review was a numerical estimate of the  
39  
40 prevalence of possible ghostwriting. The reported definitions of possible ghostwriting were  
41  
42 categorized according to the following standard definitions, irrespective of the term used to  
43  
44 describe the practice in the publication. Undisclosed writing contributions to a manuscript were  
45  
46 defined as (i) ghostwriting if they were described as not meriting authorship and were not listed  
47  
48 in the acknowledgments[9, 15] and (ii) ghost authoring if they did merit authorship and were not  
49  
50 listed in the author byline.[7] Consistent with recommendations from international medical  
51  
52 journal editors,[13, 16] Good Publication Practice guidelines,[11] and professional medical  
53  
54 writing associations,[17, 18] disclosed writing contributions to a manuscript that did not merit  
55  
56 authorship and were disclosed in the acknowledgments were not categorized as ghostwriting.  
57  
58  
59  
60



## RESULTS

### Publication selection

A total of 848 articles were retrieved from the literature search, 800 were excluded, and 48 met the eligibility criteria and were included in the systematic review (Figure 1). The main reasons for exclusion were publications not relevant to ghostwriting (n = 539), duplicate publications from different databases (n = 129), and publications not reporting a numerical estimate of the prevalence of possible ghostwriting (n = 124). The titles or abstracts of the 8 publications that were excluded because the full text or abstract could not be retrieved were reviewed; none were considered to report a numerical estimate of the prevalence of possible ghostwriting. Overall, eligible publications included 16 primary publications that reported original research on the prevalence of possible ghostwriting and 32 secondary publications that cited published or unpublished evidence of possible ghostwriting.

### Primary publications

#### Publication characteristics

Of the 16 primary publications (Table 1), there were 13 full-text publications[4, 6, 19-29] and three conference abstracts[30-32] that reported a numerical estimate of possible ghostwriting. Twelve publications[19-27, 30-32] reported findings from cross-sectional surveys and four publications[4, 6, 28, 29] reported findings from descriptive analyses of published articles. While there is no consensus on the best practice for reporting survey research,[33] most cross-sectional surveys were reasonably well reported. The surveys used were not validated but most included pretested questions, required an anonymous response, were conducted in targeted populations (ie, all individuals invited to participate were involved in the preparation of peer-reviewed manuscripts), and reported a sample size and response rate. Of the cross-sectional surveys conducted in targeted populations (eg, corresponding or first authors), six had response

1  
2  
3 rates greater than 50%, two had response rates less than 50%, and one did not report a  
4  
5 response rate (Table 1).  
6  
7

8  
9  
10 Of the cross-sectional surveys conducted in nontargeted populations (eg, individuals invited to  
11  
12 participate who may or may not have been involved in providing medical writing assistance for  
13  
14 peer-reviewed publications), three had low (12% to 28%) response rates and one did not report  
15  
16 a response rate (Table 1).  
17  
18  
19  
20  
21

22 **Table 1.** Characteristics of Primary Publications Reporting Original Evidence of Ghostwriting  
23

| Publication                                                              | Population                                  | Survey description                                           | Data collected    | N   | RR  |
|--------------------------------------------------------------------------|---------------------------------------------|--------------------------------------------------------------|-------------------|-----|-----|
| <b><i>Cross-sectional surveys – authors or corresponding authors</i></b> |                                             |                                                              |                   |     |     |
| Flanagin<br>1998[26]                                                     | 6 general medicine<br>journals <sup>a</sup> | Self-administered, postal,<br>anonymous, pretested, targeted | 1996              | 809 | 69% |
| Mowatt<br>2002[22]                                                       | Published Cochrane<br>reviews               | Self-administered, online,<br>anonymous, pretested, targeted | 1999              | 362 | 63% |
| Hao 2009[31]<br>(Abstract)                                               | Chin Med J                                  | Self-administered, email, not<br>anonymous, targeted         | 2008 <sup>c</sup> | 220 | 86% |
| Dotson<br>2011[27]                                                       | 3 pharmacy journals                         | Self-administered, online,<br>anonymous, pretested, targeted | 2009              | 112 | 25% |
| Mirzazadeh<br>2011[23]                                                   | 3 Iranian journals                          | Self-administered, email, not<br>anonymous, targeted         | 2009-<br>2010     | NR  | NR  |
| Wislar<br>2011[19]                                                       | 6 general medicine<br>journals <sup>b</sup> | Self-administered, online,<br>anonymous, pretested, targeted | 2008              | 622 | 70% |
| Ghajarzadeh<br>2012[25]                                                  | Arch Iran Med (based<br>on student theses)  | Self-administered, email,<br>anonymous, targeted             | 2005-<br>2007     | 30  | 49% |

| Publication                                                                     | Population                                                      | Survey description                                           | Data collected | N          | RR               |
|---------------------------------------------------------------------------------|-----------------------------------------------------------------|--------------------------------------------------------------|----------------|------------|------------------|
| Vinther 2012[20]                                                                | Ugeskr Laeger & Dan Med J                                       | Self-administered, online, anonymous, pretested, targeted    | 2010           | 272        | 62%              |
| <b><i>Cross-sectional surveys – healthcare professionals</i></b>                |                                                                 |                                                              |                |            |                  |
| Price 2000[21]                                                                  | Health academic staff                                           | Self-administered, postal, anonymous, pretested, targeted    | NR             | 166        | 59%              |
| Rees 2013[30] (Abstract)                                                        | Registered users of EPG Online                                  | Self-administered, online, anonymous, nontargeted            | NR             | 295        | NR               |
| <b><i>Cross-sectional surveys – members of medical writing associations</i></b> |                                                                 |                                                              |                |            |                  |
| Jacobs 2009[24]                                                                 | EMWA / AMWA members                                             | Self-administered, online, anonymous, pretested, nontargeted | 2005<br>2008   | 843<br>773 | 28%<br>14%       |
| Hamilton 2012[32] (Abstract)                                                    | EMWA / AMWA members                                             | Self-administered, online, anonymous, pretested, nontargeted | 2011           | 620        | 12% <sup>d</sup> |
| <b><i>Publication reviews and descriptive analysis</i></b>                      |                                                                 |                                                              |                |            |                  |
| Healy 2003[4]                                                                   | Articles on sertraline                                          | NA                                                           | 1998-<br>2000  | 96         | NA               |
| Gøtzsche 2007[29]                                                               | Articles on Danish industry-initiated trials approved 1994-1995 | NA                                                           | NR             | 44         | NA               |
| Ross 2008[6]                                                                    | Reviews on rofecoxib associated with Merck support              | NA                                                           | 1996-<br>2004  | 72         | NA               |
| Suda 2011[28]                                                                   | Noninferiority clinical trials                                  | NA                                                           | 1989-<br>2009  | 583        | NA               |

<sup>a</sup> Annals of Internal Medicine, JAMA, the New England Journal of Medicine, American Journal of Cardiology, American Journal of Medicine, American Journal of Obstetrics and Gynecology.

<sup>b</sup> Annals of Internal Medicine, JAMA, the New England Journal of Medicine, Lancet, Nature Medicine, PLoS Medicine.

<sup>c</sup> Submission date.

<sup>d</sup> Personal communication, C. Hamilton.

Abbreviations: AMWA, American Medical Writers Association; EMWA, European Medical Writers Association; NA, not applicable; NR, not reported; RR, response rate.

Not all cross-sectional surveys were broadly representative of the peer-reviewed medical literature. The cross-sectional surveys were conducted in single populations of academic staff or healthcare professionals[21, 30], members of medical writing associations[24, 32], or corresponding or first authors. The corresponding or first authors were surveyed from single journals (Cochrane reviews, Chinese Medical Journal, Archives of Iranian Medicine),[22, 25, 31] two Danish journals,[20] three Iranian journals,[23] and three pharmacy journals.[27] Two cross-sectional surveys of corresponding authors were conducted in six general medicine journals.[19, 26]

The descriptive analyses of published articles were conducted in single populations and included an analysis of sertraline publications from 1998 to 2000,[4] rofecoxib reviews from 1996 to 2004,[6] publications from industry-initiated trials in Denmark from 1994 to 1995,[29] and from published noninferiority trials from 1989 to 2009.[28]

1  
2  
3 Reported prevalence of ghostwriting  
4

5 The reported prevalence of possible ghostwriting in the primary publications varied markedly  
6  
7 and was difficult to compare because of the different populations assessed, methods used to  
8  
9 generate the estimates, and definitions that were used (Tables 1 and 2). All cross-sectional  
10  
11 surveys reported a definition of ghostwriting or ghost authoring, but most definitions did not  
12  
13 differentiate contributions that merited authorship from those that did not merit authorship (Table  
14  
15  
16 2).  
17  
18  
19

20  
21 **Table 2.** Primary Publications Reporting Estimates of the Prevalence of Possible Ghostwriting  
22

| Publication                                                                               | Reported measure                                                                                                                           | Estimate % (n)                                                         |
|-------------------------------------------------------------------------------------------|--------------------------------------------------------------------------------------------------------------------------------------------|------------------------------------------------------------------------|
| <b><i>Cross-sectional surveys reporting ghostwriting</i></b>                              |                                                                                                                                            |                                                                        |
| Flanagin 1998[26]                                                                         | Unnamed individual who participated in the writing                                                                                         | 1.4% (11/809) of articles                                              |
| Wislar 2011[19]                                                                           | Unnamed individual who participated in the writing                                                                                         | 0.2% <sup>a</sup> (1/622) of articles                                  |
| Jacobs 2009,<br>Hamilton 2012[24,<br>32]                                                  | Undisclosed medical writing assistance not qualifying for authorship                                                                       | 2005: 61.8% (NR)<br>2009: 41.7% (NR)<br>2011: 33.0% (NR)<br>of writers |
| <b><i>Cross-sectional surveys reporting combined ghost authoring and ghostwriting</i></b> |                                                                                                                                            |                                                                        |
| Flanagin 1998[26]                                                                         | Failure to name, as an author, individuals who made substantial contributions to the research or writing or an unidentified medical writer | 11.5% (93/809) of articles                                             |
| Price 2000[21]                                                                            | Failure to name, as an author, individuals who made substantial contributions to the research or writing                                   | 24.1% (40/166) of authors                                              |
| Mowatt 2002[22]                                                                           | Individual merited authorship or had assisted with drafting but not listed as an author or acknowledged                                    | 8.8% (32/362) of articles                                              |

| Publication                                                                                                   | Reported measure                                                                                                                                                                                                                | Estimate % (n)                    |
|---------------------------------------------------------------------------------------------------------------|---------------------------------------------------------------------------------------------------------------------------------------------------------------------------------------------------------------------------------|-----------------------------------|
| Hao 2009[31]                                                                                                  | English-language speakers assisted with writing but not identified as authors or acknowledged                                                                                                                                   | 10.4% (NR) of authors             |
| Dotson 2011[27]                                                                                               | Failure to name, as an author, individuals who made substantial contributions to the research or writing                                                                                                                        | 0.9% (1/112) of articles          |
| Wislar 2011[19]                                                                                               | Failure to name, as an author, individuals who made substantial contributions to the research or writing of the article or an unnamed individual who participated in the writing                                                | 7.9% (49/622) of articles         |
| <b><i>Cross-sectional surveys reporting ghost authoring</i></b>                                               |                                                                                                                                                                                                                                 |                                   |
| Mirzazadeh 2011[23]                                                                                           | Failure to name, as an author, individuals who made substantial contributions to the research                                                                                                                                   | 21.4% (25/NR) of authors          |
| Ghajarzadeh 2012[25]                                                                                          | Failure to name, as an author, students who made substantial contributions to the research <sup>b</sup>                                                                                                                         | 0.7% (2/296) of articles          |
| Vinther 2012[20]                                                                                              | Individual merited authorship but not listed as an author                                                                                                                                                                       | 2.4% (6/245) of articles          |
| Rees 2013[30]                                                                                                 | Individual merited authorship but not listed as an author                                                                                                                                                                       | 70% (NR/202) of published authors |
| <b><i>Publication reviews and descriptive analysis reporting possible ghost authoring or ghostwriting</i></b> |                                                                                                                                                                                                                                 |                                   |
| Healy 2003[4]                                                                                                 | Published articles coordinated by a medical information company, including acknowledged medical writing support <sup>c</sup>                                                                                                    | 57.3% (55/96) of articles         |
| Gøtzsche 2007[29]                                                                                             | Individuals who wrote the trial protocol, conducted the statistical analyses, or wrote the manuscript but were not listed as authors, not members of a study group or steering committee, or not disclosed in an acknowledgment | 75.0% (33/44) of trials           |
| Ross 2008[6]                                                                                                  | Published reviews associated with Merck support and with a single external author <sup>d</sup>                                                                                                                                  | 69.4% (50/72) of reviews          |

<sup>a</sup> Available as online supplementary data.

1  
2  
3 <sup>b</sup> Students were classified as ghostwriters if the student was not named as an author and if the results  
4 reported in the publications were based on the results of their theses.  
5  
6

7 <sup>c</sup> Authors conclude data provide quantification of the possible extent of ghostwriting based on a single  
8 drug. Of the 55 published articles that were coordinated through a medical information company, 2  
9 included medical writing assistance that was acknowledged in the published article.  
10  
11

12 <sup>d</sup> Published review articles had been identified from correspondence between Merck and a medical  
13 publishing company, from Merck publication status reports, or were affiliated with an author named within  
14 the correspondence or publication status reports. The authors did not report whether medical writing  
15 assistance was acknowledged in the published article.  
16  
17

18 Abbreviations: NR, not reported.  
19  
20  
21  
22  
23  
24  
25  
26

27 Four cross-sectional surveys reported the prevalence of ghostwriting where the definition  
28 provided could be categorized as undisclosed contributions that do not merit authorship.[19, 24,  
29 26, 32] Findings from these surveys, which were repeated at different time points, suggested  
30 that the prevalence of ghostwriting is low and decreasing. Flanagin[26] and Wislar[19]  
31 conducted two similar cross-sectional surveys of corresponding authors of articles published in  
32 six general medicine journals in 1996[26] and in 2008.[19] The surveys, which included a core  
33 set of three journals (Annals of Internal Medicine, JAMA, the New England Journal of Medicine)  
34 at each time point and in targeted populations, used pretested questions that required an  
35 anonymous response and had response rates greater than 65%. The prevalence of ghost  
36 authoring (which included ghostwriting) was estimated to be 11.5% in 1996 and 7.9% in 2008.  
37 The prevalence of ghostwriting from these surveys was estimated to be 1.4% in 1996 and 0.2%  
38 in 2008. Hamilton and Jacobs conducted a cross-sectional survey of members of two medical  
39 writing associations in 2005, 2008, and 2011.[24, 32] The survey, which was not conducted in  
40 targeted populations, used pretested questions that required an anonymous response and had  
41 response rates from 12% to 28% of the total population surveyed (ie, not all participants  
42  
43  
44  
45  
46  
47  
48  
49  
50  
51  
52  
53  
54  
55  
56  
57  
58  
59  
60

1  
2  
3 surveyed were involved in the preparation of peer-reviewed manuscripts). Findings from these  
4  
5 surveys suggested that the percentage of association members who contributed to peer-  
6  
7 reviewed publications and had ghostwritten at least once during the survey year had decreased  
8  
9 from 61.8% in 2005 to 33.0% in 2011.  
10

11  
12  
13  
14 Six cross-sectional survey publications reported the prevalence of possible ghostwriting (ie, the  
15  
16 prevalence of ghostwriting and ghost authoring combined).[19, 21, 22, 26, 27, 31] The  
17  
18 prevalence of possible ghostwriting reported in these cross-sectional surveys varied from 0.9%  
19  
20 to 24.1% of publications or authors.  
21  
22

23  
24  
25 Four cross-sectional survey publications reported the prevalence of ghost authoring.[20, 23, 25,  
26  
27 30] The prevalence of ghost authoring reported in these cross-sectional surveys varied from  
28  
29 0.7% to 70% of publications or authors.  
30  
31

32  
33  
34 The descriptive analyses of published articles on sertraline and rofecoxib did not include a  
35  
36 prespecified definition of ghost authoring or ghostwriting;[4, 6] in these studies, possible  
37  
38 ghostwriting or ghost authoring was assumed in publications associated with industry-  
39  
40 sponsored support (Table 2). The descriptive analysis of industry-initiated trials in Denmark  
41  
42 used a nonstandard definition of ghost authors; in this study ghost authors were defined as  
43  
44 individuals, not named as authors, who were involved in writing the protocol, conducting the  
45  
46 statistical analyses, or writing the manuscript.[29] The prevalence of possible ghostwriting in the  
47  
48 two descriptive analyses of single drugs that did not include a prespecified definition of  
49  
50 ghostwriting was 57% of articles on sertraline published from 1998 to 2000[4] and 69% of  
51  
52 reviews on rofecoxib published from 1996 to 2004.[6] The prevalence of possible ghostwriting in  
53  
54 the descriptive analysis of Danish industry-initiated trials, which used a nonstandard definition of  
55  
56 authorship, was 75% of Danish initiated trials approved in 1994 to 1995.[29] The descriptive  
57  
58  
59  
60



1  
2  
3 analysis of noninferiority trials[28] was not considered further as the definition of ghostwriting  
4 used was consistent with disclosed medical writing assistance. In this study ghostwriters were  
5 defined as acknowledged individuals, other than authors, who contributed to the writing and  
6 were affiliated with an industry-sponsored study.[28] The prevalence of disclosed medical  
7 writing assistance in this descriptive analysis was 17.3% (101/583) of clinical trials.  
8  
9  
10  
11  
12  
13

## 14 15 16 **Secondary publications**

### 17 18 **Publication characteristics**

19  
20 Of the 32 secondary publications, there were 13 review articles, 10 editorials, 5 commentaries,  
21 3 news articles, and 1 government report, with most being published after 2008 (Table 3). Most  
22 publications cited primary sources as evidence of the prevalence of possible ghostwriting (Table  
23 3), with the cited prevalence of possible ghostwriting varying from 6% of publications to 100% of  
24 publications involving drugs. In most secondary publications, the information on the prevalence  
25 of ghostwriting was not reported consistently compared with the cited evidence (Table 3).  
26  
27  
28  
29  
30  
31  
32

33 Misleading and mistaken information was reported in many publications that (i) did not  
34 distinguish between ghostwriting and ghost authoring, (ii) included acknowledged medical  
35 writing assistance or a combined estimate of guest authorship and ghost authorship as  
36 ghostwriting, (iii) generalized findings from publication reviews and analyses of specific datasets  
37 to wider populations of publications or industry-sponsored trials, or (iv) cited personal  
38 communications or informal surveys where the original source was unpublished and could not  
39 be verified (Table 3).  
40  
41  
42  
43  
44  
45  
46  
47  
48  
49  
50  
51  
52  
53  
54  
55  
56  
57  
58  
59  
60

**Table 3.** Characteristics of Secondary Publications Citing Evidence of Possible Ghostwriting

| <b>Publication</b>                          | <b>Cited evidence</b>  | <b>Consistent with cited source(s)</b> | <b>Comment</b>                                                                       |
|---------------------------------------------|------------------------|----------------------------------------|--------------------------------------------------------------------------------------|
| Elliot Hastings Cent Rep 2004[35]           | Primary                | No                                     | Did not distinguish GW from GA                                                       |
| Moffat Perspect Biol Med 2007[36]           | Primary                | No                                     | Did not distinguish GW from GA                                                       |
| Schiefe Pharmacotherapy 2009[47]            | Primary                | No                                     | Did not distinguish GW from GA                                                       |
| MacLennan Climacteric 2010[48]              | Primary                | No                                     | Did not distinguish GW from GA                                                       |
| Nahai Aesthet Surg J 2010[49]               | Secondary              | No                                     | Did not distinguish GW from GA                                                       |
| Ngai Account Res 2005[50]                   | Primary                | Yes                                    | Did not distinguish GW from GA                                                       |
| Bosch EMBO Rep 2011[43]                     | Primary                | Yes                                    | Did not distinguish GW from GA                                                       |
| Wiwanitkit Am J Med 2012[51]                | Primary                | No                                     | Did not distinguish GW from GA<br>or GA from guest authorship                        |
| Krimsky Med Law 2007[52]                    | Primary                | No                                     | Did not distinguish GW from GA<br>or GA from guest authorship                        |
| Langdon-Neuner Mens Sana Monogr<br>2008[53] | Primary &<br>secondary | No                                     | Did not distinguish GW from GA<br>or GW from disclosed medical<br>writing support    |
| Tharyan Indian J Med Ethics 2011[45]        | Primary                | Yes                                    | Did not distinguish GW from GA<br>or GW from disclosed medical<br>writing assistance |
| Paul Clin Microbiol Infect 2009[54]         | Primary                | Yes                                    | Did not distinguish GW / GA<br>from disclosed medical writing<br>assistance          |
| Bavdekar Lung India 2012[42]                | Primary                | No                                     | Did not distinguish GW from GA<br>and generalized evidence to a<br>wider population  |
| Górski Transplant Proc 2010[55]             | Primary &              | No                                     | Did not distinguish GW from GA                                                       |

| Publication                                  | Cited evidence      | Consistent with cited source(s) | Comment                                                                                   |
|----------------------------------------------|---------------------|---------------------------------|-------------------------------------------------------------------------------------------|
|                                              | secondary           |                                 | and generalized evidence to a wider population                                            |
| Matias-Guiu Neurologia 2011[44]              | Primary & secondary | No                              | Did not distinguish GW from GA and generalized evidence to a wider population             |
| McHenry Mens Sana Monogr 2010[56]            | Gov. report         | No                              | Generalized evidence to a wider population                                                |
| Healy BMJ 2004[57]                           | Primary & secondary | No / ND                         | Generalized evidence to a wider population and reported personal opinion of GW prevalence |
| Abbasi BMJ 2004[2]                           | Secondary           | No                              | Secondary publication cited named individual                                              |
| Mitrany Science Editor 2005[58]              | None                | ND                              | Cited named individual                                                                    |
| Collier Can Med Assoc J 2009[3]              | None                | ND                              | Cited named individual                                                                    |
| Kmietowicz BMJ 2004[59]                      | None                | ND                              | Cited named individual                                                                    |
| Matthews Wall St J 2005[1]                   | None                | ND                              | Cited unpublished data                                                                    |
| Bonita Heart Fail Clin 2011[60]              | Primary             | Yes                             | Consistent with cited source                                                              |
| Grassley Int J Occup Environ Health 2011[61] | Primary             | Yes                             | Consistent with cited source                                                              |
| Nat Clin Pract Nephrol 2007[62]              | Primary             | Yes                             | Consistent with cited source                                                              |
| Editors J Urol 2008[14]                      | Primary             | Yes                             | Consistent with cited source                                                              |
| Baethge Deutsches Arzteblatt 2009[63]        | Primary             | Yes                             | Consistent with cited source                                                              |
| Flanagin CSE Annual Mtg 2010[64]             | Primary             | Yes                             | Consistent with cited source                                                              |
| Murray Open Med 2010[65]                     | Primary             | Yes                             | Consistent with cited source                                                              |

| Publication             | Cited evidence | Consistent with cited source(s) | Comment                      |
|-------------------------|----------------|---------------------------------|------------------------------|
| Moore BMJ 2004[66]      | Secondary      | Yes                             | Consistent with cited source |
| Hargreaves BMJ 2007[67] | Primary        | Yes                             | Consistent with cited source |
| Jones Nature 2009[68]   | Primary        | Yes                             | Consistent with cited source |

Abbreviations: CSE, Council of Science Editors; GA, ghost authoring; Gov, government; GW, ghostwriting; ND, not determined.

#### Case study of misleading and mistaken evidence

An analysis of secondary publications citing the possible prevalence of ghostwriting in sertraline publications provides an illuminating case study on how misleading or mistaken evidence can enter and remain in the medical literature. In 2003, Healy and Cattell showed that 57% (55/96) of articles on sertraline published from 1998 to 2000 were coordinated through a medical information company and only two acknowledged medical writing assistance.[4] The authors concluded that these data provided information on the “possible extent of ghostwriting based on a single drug”. In 2004 (October 14), Healy also provided evidence on the influence of the pharmaceutical industry on key groups at a United Kingdom House of Commons Health Select Committee investigation.[34] In answer to Question 197, Healy stated the following:

*“My estimate is that, even in journals like the BMJ, the Lancet, the New England Journal of Medicine and JAMA, the leading journals in the field, if these articles have to do with therapeutics, with drugs, it may be worse perhaps for psychiatry than elsewhere, but I doubt it, 50% of these articles are ghostwritten. It may be higher.”*

1  
2  
3 Healy and Cattell's original evidence has been cited incorrectly and interchangeably with Healy's  
4 statement to the House of Commons Health Select Committee investigation (Figure 2). Although  
5 findings from the primary publication have been cited and interpreted correctly in two secondary  
6 publications,[35, 36] many secondary publications incorrectly cited Healy's original evidence and  
7 statement to the House of Commons Health Select Committee investigation (Figure 2).  
8  
9  
10  
11  
12  
13

## 14 15 16 17 18 **DISCUSSION** 19

20  
21  
22 This systematic review on the reported prevalence of ghostwriting in the medical literature  
23 showed that the estimates of the prevalence of ghostwriting in primary publications varied  
24 markedly and were influenced by the definitions used, the types of study designs, and the  
25 populations assessed. In addition, secondary publications often cited outdated, misleading, or  
26 mistaken evidence of the reported prevalence of ghostwriting, with many publications not  
27 distinguishing ghostwriting from ghost authoring.  
28  
29  
30  
31  
32  
33  
34

35  
36  
37 Although evidence from descriptive analyses can highlight the extent of ghostwriting in single  
38 populations, evidence from well-conducted cross-sectional surveys have the potential to provide  
39 estimates of the prevalence of ghostwriting that may be generalized to the majority of peer-  
40 reviewed publications. Despite this, many of the cross-sectional surveys retrieved in this  
41 systematic review were conducted in limited populations that were not broadly representative of  
42 the peer-reviewed medical literature. In addition, many of the cross-sectional surveys did not  
43 differentiate between contributions that merited authorship from those that did not merit  
44 authorship and provided at best, an estimate of possible ghostwriting. The reported prevalence  
45 of ghostwriting, where ghostwriting was defined as undisclosed contributions that did not merit  
46 authorship, was retrieved from the two cross-sectional surveys of corresponding authors from  
47  
48  
49  
50  
51  
52  
53  
54  
55  
56  
57  
58  
59  
60

1  
2  
3 several general medicine journals and by cross-sectional surveys (repeated on three separate  
4 occasions from 2005 to 2011) of members of two major medical writing associations. Together  
5 the findings from these surveys suggested that the prevalence of ghostwriting has decreased in  
6 recent years. However, while the findings from these surveys may be considered more broadly  
7 representative of the peer-reviewed medical literature than surveys focused on single journals,  
8 single countries, or single subject areas, interpretation of these findings should take into account  
9 that respondents were required to retrospectively self-report potentially unethical or  
10 unprofessional behaviour.  
11  
12  
13  
14  
15  
16  
17  
18  
19

20  
21  
22 Unethical authorship practices are a major concern and are an increasingly recognized problem  
23 in the medical literature.[37] As the findings from this systematic review suggest, some of these  
24 perceived problems may arise from the considerable, but unnecessary, confusion and  
25 disagreement surrounding the definitions of ghostwriting. As recognized by the World  
26 Association of Medical Editors, professional medical writers can have a legitimate role in  
27 assisting authors to communicate their research findings in the peer-reviewed literature.[13]  
28  
29 Professional medical writers can and do improve the timeliness and quality of reporting and can  
30 assist investigators and industry sponsors to meet their ethical commitments to the disclosure  
31 and publishing of clinical trial results.[7, 38-40] As such, the misleading and mistaken reporting  
32 of the prevalence of ghostwriting that was evident in the secondary publications retrieved in this  
33 systematic review is disappointing. Specifically, the confusion surrounding definitions of ghost  
34 authorship and ghostwriting and the unbalanced focus on industry as the source of unethical  
35 authorship practices in the secondary publications takes attention away from the need to focus  
36 on all types of unethical contributions in peer-reviewed publications, irrespective of the source of  
37 the unethical practice.  
38  
39  
40  
41  
42  
43  
44  
45  
46  
47  
48  
49  
50  
51  
52  
53  
54  
55  
56  
57  
58  
59  
60

1  
2  
3 The strengths of this systematic review are that a broad search strategy was employed with few  
4 restrictions to minimize any potential for publication or language bias. All study designs and  
5 publication types were considered and there were no restrictions on language. Although the full  
6 text or abstracts of 8 publications could not be retrieved, omission of these publications was  
7 unlikely to have biased the findings. Review of the abstracts or titles of these publications  
8 suggested that none reported numerical estimates of the prevalence of ghostwriting. The major  
9 finding of this review was the limitations of the reported evidence of ghostwriting in the medical  
10 literature. These limitations included the heterogeneity among the studies in the outcomes  
11 reported and populations investigated, the observational study designs, and the retrospective  
12 nature of data collection. Given the nature of unethical authorship practices, it may not be  
13 feasible to conduct a prospective study on ghostwriting. However, based on the findings from  
14 this review, recommendations can be made to help researchers, authors, editors, and peer-  
15 reviewers apply the same rigorous standards that are applied to the conduct and assessment of  
16 all clinical research and actively improve the quality of reporting of the evidence of unethical  
17 authorship practices.  
18  
19  
20  
21  
22  
23  
24  
25  
26  
27  
28  
29  
30  
31  
32  
33  
34  
35  
36  
37

38 Researchers should use a standard definition of ghostwriting so that the confusion around  
39 ghostwriters and ghost authors is not perpetuated. Ghostwriting is paid or unpaid writing  
40 assistance by individuals who generally do not merit authorship and whose contributions are not  
41 disclosed in the acknowledgments.[7] In contrast, ghost authoring is contributions to the  
42 research, data analysis, and/or writing of a manuscript by individuals who do merit authorship  
43 and whose contributions are not disclosed in the author byline.[7] For example, the descriptive  
44 analysis of Danish industry-initiated trials used a nonstandard definition of authorship, which is  
45 likely to have contributed to the very high prevalence of possible ghostwriting reported in this  
46 study (75%). In this study, Gøtzsche et al.[29] suggested that individuals who write the trial  
47 protocol, conduct the statistical analyses, or who contribute to the writing of a publication should  
48  
49  
50  
51  
52  
53  
54  
55  
56  
57  
58  
59  
60

1  
2  
3 be included as authors. Indeed, the prevalence of ghost authorship in this study was 91% when  
4  
5 the analyses included these individuals, irrespective of whether they had been appropriately  
6  
7 acknowledged elsewhere. Given that the Gøtzsche et al.[29] study has been downloaded more  
8  
9 than 3,000 times since publication[41] and cited repeatedly as evidence not only of ghost  
10  
11 authorship but also of ghostwriting,[42-45] it would have been illuminating if the authors had  
12  
13 included an estimate of the prevalence of ghostwriting using standard definitions for  
14  
15 comparison. In addition to using standard definitions of ghostwriting, researchers and authors  
16  
17 should ensure that cited evidence of ghostwriting is reported accurately without unwarranted  
18  
19 generalizations. Publications based on personal commentary should be avoided and studies  
20  
21 that use nonstandard definitions, specific populations, or that were conducted before a change  
22  
23 in practice (eg, before the adoption of the Good Publication Practice guidelines for  
24  
25 communicating company sponsored research in 2003 [GPP][46] and in 2009 [GPP2][11])  
26  
27 should be described in context.  
28  
29  
30  
31  
32

33  
34 Editors and peer reviewers have a duty to prevent outdated, misleading, or mistaken evidence  
35  
36 on the prevalence of ghostwriting from being published and perpetuated. Close attention should  
37  
38 be paid to the internal and external validity of the study, the definitions used, how the data are  
39  
40 reported, and whether the data are interpreted within the context of current practices. When  
41  
42 assessing a submitted manuscript on ghostwriting, editors should consider using peer reviewers  
43  
44 with expertise in the appropriate study designs (eg, survey research) and ethical publication  
45  
46 practices. Collectively, these actions could help prevent further questionable evidence on the  
47  
48 prevalence of ghostwriting from being published.  
49  
50  
51  
52

53  
54 In conclusion, the findings from this systematic review showed that reports of the prevalence of  
55  
56 ghostwriting in the medical literature are limited by the varied definitions used to describe  
57  
58 unethical authorship practices, the types of study designs employed, and the populations  
59  
60



1  
2  
3 assessed. To improve reporting, researchers should not inflate estimates using nonstandard  
4 definitions of ghostwriting nor conflate ghostwriting with other unethical authorship practices.  
5  
6 While open and transparent debate should be encouraged, editors and peer reviewers should  
7  
8 not accept articles that incorrectly cite or interpret primary publications that report the  
9  
10 prevalence of ghostwriting.  
11  
12

### 13 14 15 16 17 18 **ACKNOWLEDGMENTS** 19

20 The author, SS, contributed to the conception and design of the systematic literature review, the  
21 collection and screening of publications, and the analysis and interpretation of the findings. SS  
22 drafted and critically revised draft versions of the manuscript, gave final approval for  
23 submission, and agrees to be accountable for all aspects of the work.  
24  
25  
26  
27  
28  
29

30  
31 The author acknowledges and thanks Sericka McGee, PharmD, Hamilton House, for her  
32 contributions to the conception and design of the systematic literature review and the collection  
33 and screening of articles for inclusion. Sericka McGee contributed to an earlier version of the  
34 systematic review (search dates 1966 to May 2011), which was presented at the 8th Annual  
35 Meeting, International Society for Medical Publication Professionals, 23-25 Apr 2012 and at the  
36 72<sup>nd</sup> Annual Conference, American Medical Writers Association, 4-6 Oct 2012, Sacramento,  
37 USA. The author thanks Professor Karen Woolley, PhD, CMPP (ProScribe Medical  
38 Communications) and Dr Cindy Hamilton, PharmD, ELS (Hamilton House) for their stimulating  
39 and valuable contributions to the interpretation of the findings from this study and for their critical  
40 review during the drafting of the manuscript.  
41  
42  
43  
44  
45  
46  
47  
48  
49  
50  
51  
52  
53  
54  
55  
56  
57  
58  
59  
60

### COMPETING INTERESTS

The author is a professional medical writer who is actively involved in national and international not-for-profit organizations that encourage ethical medical writing practices. The author has no relationships with any pharmaceutical company that might have an interest in the submitted work and has no other relationships that could be construed as a competing interest.

### FUNDING

The author was supported (eg, reimbursement of expenses for conference travel) by her employer, ProScribe Medical Communications, for the submitted work. No other funding was received to conduct this research.

1  
2  
3  
4  
5  
6  
7  
8  
9  
10  
11  
12  
13  
14  
15  
16  
17  
18  
19  
20  
21  
22  
23  
24  
25  
26  
27  
28  
29  
30  
31  
32  
33  
34  
35  
36  
37  
38  
39  
40  
41  
42  
43  
44  
45  
46  
47  
48  
49  
50  
51  
52  
53  
54  
55  
56  
57  
58  
59  
60  

## REFERENCES

1. Mathews AW. Ghost story: at medical journals, writers paid by industry play big role. *Wall St J (East Ed)* 2005:A1, A8.
2. Abbasi K. Editor's choice: Transparency and trust. *BMJ* 2004;**329**:0.8.
3. Collier R. Prevalence of ghostwriting spurs calls for transparency. *Can Med Assoc J* 2009;**181**:E161-2.
4. Healy D, Cattell D. Interface between authorship, industry and science in the domain of therapeutics. *Br J Psychiatry* 2003;**183**:22-7.
5. PLoS Med Editors. Ghostwriting: The dirty little secret of medical publishing that just got bigger. *PLoS Med* 2009;**6**:e1000156.
6. Ross JS, Hill KP, Egilman DS, *et al.* Guest authorship and ghostwriting in publications related to rofecoxib: A case study of industry documents from rofecoxib litigation. *JAMA* 2008;**299**:1800-12.
7. Woolley KL, Gertel A, Hamilton CW, *et al.* Time to finger point or fix? An invitation to join ongoing efforts to promote ethical authorship and other good publication practices. *Ann Pharmacother* 2013;**47**:1084-7.
8. Scott-Lichter D and the Editorial Policy Committee of the Council of Science Editors. CSE's White Paper on Promoting Integrity in Scientific Journal Publications, 2012 Update. Wheat Ridge, CO: 2012. [http://www.councilscienceeditors.org/files/public/entire\\_whitepaper.pdf](http://www.councilscienceeditors.org/files/public/entire_whitepaper.pdf) (accessed 30 December 2013).
9. Gøtzsche PC, Kassirer JP, Woolley KL, *et al.* What should be done to tackle ghostwriting in the medical literature? *PLoS Med* 2009;**6**:e23.
10. Woolley KL, Ely JA, Woolley MJ, *et al.* Declaration of medical writing assistance in international peer-reviewed publications. *JAMA* 2006;**296**:932-4.

- 1  
2  
3 11. Graf C, Battisti WP, Bridges D, *et al*. Research Methods & Reporting. Good publication  
4  
5 practice for communicating company sponsored medical research: the GPP2 guidelines.  
6  
7 *BMJ* 2009;**339**:b4330.  
8
- 9  
10 12. Nastasee S. Acknowledgement of medical writers in medical journal articles: a comparison  
11  
12 from the years 2000 and 2007. *AMWA J* 2010;**25**:2-6.  
13
- 14 13. World Association of Medical Editors. Policy Statement: Ghost writing initiated by  
15  
16 commercial companies, Revised 15 June 2005.  
17  
18 <http://www.wame.org/resources/policies#ghost> (accessed 30 December 2013).  
19
- 20  
21 14. Editors. Ghost writers in the sky. *J Urol* 2008;**179**:809-10.  
22
- 23 15. Woolley KL. Goodbye Ghostwriters!: How to work ethically and efficiently with professional  
24  
25 medical writers. *Chest* 2006;**130**:921-3.  
26
- 27 16. International Committee of Medical Journal Editors. Recommendations for the conduct,  
28  
29 reporting, editing and publication of scholarly work in medical journals. Roles and  
30  
31 responsibilities of authors, contributors, reviewers, editors, publishers, and owners:  
32  
33 defining the role of authors and contributors. 2013. [http://www.icmje.org/roles\\_a.html](http://www.icmje.org/roles_a.html)  
34  
35 (accessed 30 December 2013).  
36
- 37  
38 17. Jacobs A, Wager E. European Medical Writers Association (EMWA) guidelines on the role  
39  
40 of medical writers in developing peer-reviewed publications. *Curr Med Res Opin*  
41  
42 2005;**21**:317-22.  
43
- 44 18. Hamilton C. AMWA position statement on the contributions of medical writers to scientific  
45  
46 publications. *AMWA J* 2003;**18**:13-6.  
47
- 48  
49 19. Wislar JS, Flanagin A, Fontanarosa PB, *et al*. Honorary and ghost authorship in high impact  
50  
51 biomedical journals: a cross sectional survey. *BMJ* 2011;**343**:d6128.  
52
- 53  
54 20. Vinther S, Rosenberg J. Appearance of ghost and gift authors in Ugeskrift for Laeger and  
55  
56 Danish Medical Journal. *Dan Med J* 2012;**59**:1-6.  
57  
58  
59  
60

- 1  
2  
3 21. Price J, Dake J, Oden L. Authorship of health education articles: Guests, ghosts and trends.  
4  
5 *Am J Health Behavior* 2000;**24**:290-9.  
6  
7 22. Mowatt G, Shirran L, Grimshaw JM, *et al.* Prevalence of honorary and ghost authorship in  
8  
9 Cochrane reviews. *JAMA* 2002;**287**:2769-71.  
10  
11 23. Mirzazadeh A, Navadeh S, Rokni M, *et al.* The prevalence of honorary and ghost  
12  
13 authorships in Iranian bio-medical journals and its associated factors. *Iran J Public Health*  
14  
15 2011;**40**:15-21.  
16  
17 24. Jacobs A, Hamilton C. Decreased evidence of ghostwriting in a 2008 vs 2005 survey of  
18  
19 medical writers. *Write Stuff* 2009;**18**:118-23.  
20  
21 25. Ghajarzadeh M. Guest authors in an Iranian journal. *Dev World Bioeth.* Published Online  
22  
23 First: 1 Oct 2012. doi: 10.1111/dewb.12002.  
24  
25 26. Flanagan A, Carey LA, Fontanarosa PB, *et al.* Prevalence of articles with honorary authors  
26  
27 and ghost authors in peer- reviewed medical journals. *JAMA* 1998;**280**:222-4.  
28  
29 27. Dotson B, Slaughter RL. Prevalence of articles with honorary and ghost authors in three  
30  
31 pharmacy journals. *Am J Health Syst Pharm* 2011;**68**:1730-4.  
32  
33 28. Suda KJ, Hurley AM, McKibbin T, *et al.* Publication of noninferiority clinical trials: Changes  
34  
35 over a 20-year interval. *Pharmacotherapy* 2011;**31**:833-9.  
36  
37 29. Gøtzsche PC, Hróbjartsson A, Johansen HK, *et al.* Ghost authorship in industry-initiated  
38  
39 randomised trials. *PLoS Med* 2007;**4**:0047-52.  
40  
41 30. Rees T, Kelly M, Smith S. How much do healthcare professionals know about GPP  
42  
43 authorship criteria? *Curr Med Res Opin* 2013;**29**:S18-S9.  
44  
45 31. Hao X, Qian S, You S, *et al.* Ghost writers and honorary authorship: a survey from the  
46  
47 Chinese Medical Journal [abstract]. *Sixth International Congress on Peer Review and*  
48  
49 *Biomedical Publication; 2009 Sept 10-12; Vancouver, BC, Canada* 2009.  
50  
51 32. Hamilton CW, Jacobs A. Evidence of decreased ghostwriting in a series of three surveys of  
52  
53 medical communicators conducted between 2005 and 2011. *AMWA J* 2012;**27**:115.  
54  
55  
56  
57  
58  
59  
60

- 1  
2  
3  
4  
5  
6  
7  
8  
9  
10  
11  
12  
13  
14  
15  
16  
17  
18  
19  
20  
21  
22  
23  
24  
25  
26  
27  
28  
29  
30  
31  
32  
33  
34  
35  
36  
37  
38  
39  
40  
41  
42  
43  
44  
45  
46  
47  
48  
49  
50  
51  
52  
53  
54  
55  
56  
57  
58  
59  
60
33. Bennett C, Khangura S, Brehaut J, *et al*. Reporting guidelines for survey research: an analysis of published guidance and reporting practices. *PLoS Med* 2011;**8**:e1001069.
34. Williams M. An inquiry by the UK House of Commons Health Select Committee into the influence of the pharmaceutical industry (18 October). 2004.  
[http://www.meactionuk.org.uk/HoC\\_Select\\_Ctte\\_Inquiry\\_into\\_Pharma.htm](http://www.meactionuk.org.uk/HoC_Select_Ctte_Inquiry_into_Pharma.htm) (accessed 30 December 2013).
35. Elliott C. Pharma goes to the laundry: Public relations and the business of medical education. *Hastings Cent Rep* 2004;**34**:18-23.
36. Moffatt B, Elliott C. Ghost marketing: Pharmaceutical companies and ghostwritten journal articles. *Perspect Biol Med* 2007;**50**:18-31.
37. Marušić A, Bošnjak L, Jeronšić A. A systematic review of research on the meaning, ethics and practices of authorship across scholarly disciplines. *PLoS One* 2011;**6**:e23477.
38. Bailey M. Science editing and its effect on manuscript acceptance time. *AMWA J* 2011;**26**:147-52.
39. Jacobs A. Adherence to the CONSORT guideline in papers written by professional medical writers. *Write Stuff* 2010;**19**:196-200.
40. Woolley KL, Lew RA, Stretton S, *et al*. Lack of involvement of medical writers and the pharmaceutical industry in publications retracted for misconduct: a systematic, controlled, retrospective study. *Curr Med Res Opin* 2011;**27**:1175-82.
41. PLoS Med. Article metrics: Ghost authorship in industry-initiated randomised trials: PLoS Med, 2013.
42. Bavdekar SB. Authorship issues. *Lung India* 2012;**29**:76-80.
43. Bosch X. Exorcising ghostwriting. Ghostwriting could potentially have serious repercussions for science and should therefore be treated as research misconduct. *EMBO Rep* 2011;**12**:489-94.

- 1  
2  
3 44. Matías-Guiu J, García-Ramos R. Ghost-authors, improvement article communication, and  
4  
5 medical publications. *Neurologia* 2011;**26**:257-61.  
6  
7  
8 45. Tharyan P. Evidence-based medicine: can the evidence be trusted? *Indian J Med Ethics*  
9  
10 2011;**8**:201-7.  
11  
12 46. Wager E, Field EA, Grossman L. Good publication practice for pharmaceutical companies.  
13  
14 *Curr Med Res Opin* 2003;**19**:149-54.  
15  
16 47. Scheife RT. A ghost in the machine. *Pharmacotherapy* 2009;**29**:363-4.  
17  
18 48. MacLennan A, Sturdee D, Fenton A, *et al*. Editorial: Ghost writers, vested interest and  
19  
20 funding disclosures. *Climacteric* 2010;**13**:301-2.  
21  
22 49. Nahai F. Ghostwriting: Stringent disclosure policies take aim at authorship abuses. *Aesthet*  
23  
24 *Surg J* 2010;**30**:265-6.  
25  
26 50. Ngai S, Gold JL, Gill SS, *et al*. Haunted manuscripts: ghost authorship in the medical  
27  
28 literature. *Account Res* 2005;**12**:103-14.  
29  
30 51. Wiwanitkit V. Ghostwriting: An existing problem. *Am J Med* 2012;**125**:e17.  
31  
32 52. Krinsky S. When conflict-of-interest is a factor in scientific misconduct. *Med Law*  
33  
34 2007;**26**:447-63.  
35  
36 53. Langdon-Neuner E. Medical ghost-writing. *Mens Sana Monogr* 2008;**6**:257-73.  
37  
38 54. Paul M. On transparency, responsibility, and accountability. *Clin Microbiol Infect*  
39  
40 2009;**15**:1100-2.  
41  
42 55. Górski A, Letkiewicz S. "Medical writing" and ghostwriting as ethical challenges in medical  
43  
44 communication. *Transplant Proc* 2010;**42**:3335-7.  
45  
46 56. McHenry L. Of sophists and spin-doctors: industry-sponsored ghostwriting and the crisis of  
47  
48 academic medicine. *Mens Sana Monogr* 2010;**8**:129-45.  
49  
50 57. Healy DT. Transparency and trust: figure for ghost written articles was misquoted. *BMJ*  
51  
52 2004;**329**:1345.  
53  
54  
55  
56  
57  
58  
59  
60

- 1  
2  
3 58. Mitrany D. The ghostwriting controversy: Time for a proper burial. *Science Editor*  
4  
5 2005;**28**:187.  
6  
7  
8 59. Kmietowicz Z. Consumer organisations criticise influence of drug companies. *BMJ*  
9  
10 2004;**329**:937.  
11  
12 60. Bonita RE, Adams S, Whellan DJ. Reporting of clinical trials: publication, authorship, and  
13  
14 trial registration. *Heart Fail Clin* 2011;**7**:561-7.  
15  
16 61. Anon. Ghostwriting in medical literature. *Int J Occup Environ Health* 2011;**17**:168-77.  
17  
18 62. Anon. High prevalence of ghost authorship in industry-initiated trials. *Nat Clin Pract Nephrol*  
19  
20 2007;**3**:240.  
21  
22 63. Baethge C. On ghost authorship and reviews: The 6th International Congress on Peer  
23  
24 Review and Biomedical Publication. *Deutsches Arzteblatt* 2009;**106**:731-2.  
25  
26 64. Flanagan A. Research on authorship. What do we know about the prevalence of ghost  
27  
28 authorship? *Council of Science Editors Annual Meeting, May 14-18, Atlanta, Georgia*  
29  
30 2010.  
31  
32 65. Murray S, Brophy J, Palepu A. Open Medicine's ghost and guest authorship policy. *Open*  
33  
34 *Med* 2010;**4**:e11-2.  
35  
36 66. Moore N. Transparency and trust: Clear definition of ghost writing would be helpful. *BMJ*  
37  
38 2004;**329**:1345-6.  
39  
40 67. Hargreaves S. Industry funded trials often have ghost authorship. *BMJ* 2007;**334**:223.  
41  
42 68. Jones N. Ghosts still present in the medical machine. *Nature* 2009;**461**:325.  
43  
44  
45  
46  
47  
48  
49  
50  
51  
52  
53  
54  
55  
56  
57  
58  
59  
60



## FIGURE LEGENDS

**Figure 1. Selection of publications reporting a numerical estimate of the prevalence of ghostwriting.** Electronic databases were searched on 23 May 2013.

<sup>a</sup> Journal of the European Medical Writers Association, formerly known as The Write Stuff.

<sup>b</sup> Journal of the American Medical Writers Association.

<sup>c</sup> Council of Science Editors Annual Meetings.

<sup>d</sup> International Congress on Peer Review and Biomedical Publication.

**Figure 2. Case study of original versus cited evidence of ghostwriting prevalence.**

Contrast between original evidence on the prevalence of possible ghostwriting in sertraline publications from 1998 to 2000 and the subsequent citations of this evidence. Source of the original published evidence: Healy and Cattell[4] showed that 55 of 96 (57%) articles published on sertraline from 1998 to 2000 were coordinated through a medical communications company and concluded that these data provided information on the “possible extent of ghostwriting based on a single drug”. Inaccurate reporting from the cited source is marked with a cross.

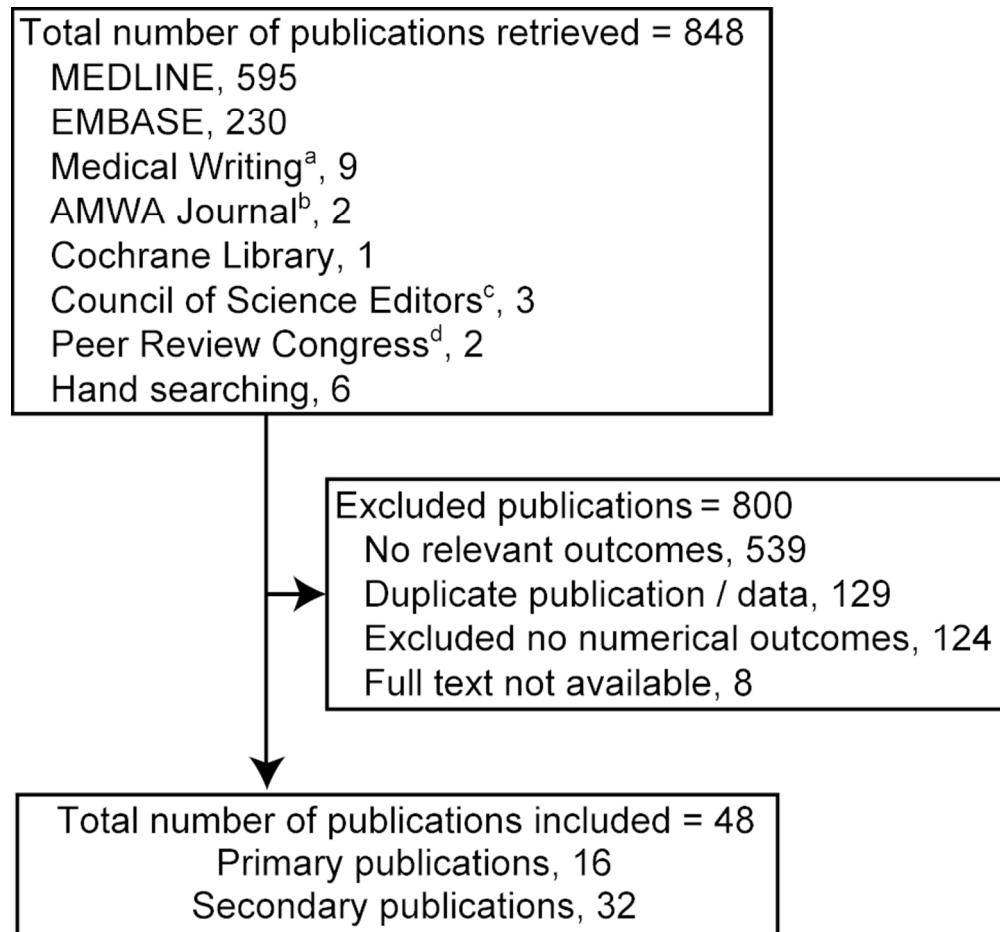

Figure 1. Selection of publications reporting a numerical estimate of the prevalence of ghostwriting.

Electronic databases were searched on 23 May 2013.

a Journal of the European Medical Writers Association, formerly known as The Write Stuff.

b Journal of the American Medical Writers Association.

c Council of Science Editors Annual Meetings.

d International Congress on Peer Review and Biomedical Publication.

82x76mm (300 x 300 DPI)

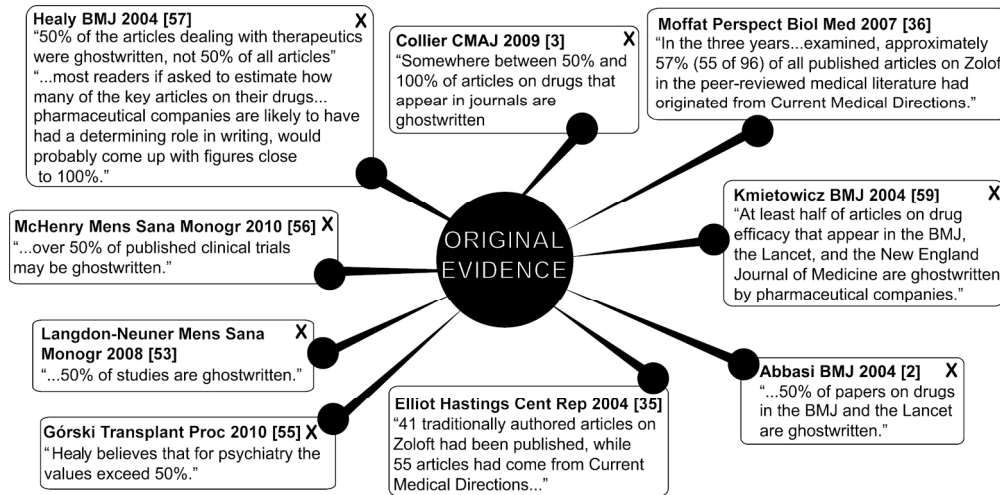

Figure 2. Case study of original versus cited evidence of ghostwriting prevalence. Contrast between original evidence on the prevalence of possible ghostwriting in sertraline publications from 1998 to 2000 and the subsequent citations of this evidence. Source of the original published evidence: Healy and Cattell[4] showed that 55 of 96 (57%) articles published on sertraline from 1998 to 2000 were coordinated through a medical communications company and concluded that these data provided information on the “possible extent of ghostwriting based on a single drug”. Inaccurate reporting from the cited source is marked with a cross.

170x83mm (300 x 300 DPI)

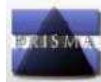

# PRISMA 2009 Checklist

| Section/topic                      | #  | Checklist item                                                                                                                                                                                                                                                                                              | Reported on page # |
|------------------------------------|----|-------------------------------------------------------------------------------------------------------------------------------------------------------------------------------------------------------------------------------------------------------------------------------------------------------------|--------------------|
| <b>TITLE</b>                       |    |                                                                                                                                                                                                                                                                                                             |                    |
| Title                              | 1  | Identify the report as a systematic review, meta-analysis, or both.                                                                                                                                                                                                                                         | 1                  |
| <b>ABSTRACT</b>                    |    |                                                                                                                                                                                                                                                                                                             |                    |
| Structured summary                 | 2  | Provide a structured summary including, as applicable: background; objectives; data sources; study eligibility criteria, participants, and interventions; study appraisal and synthesis methods; results; limitations; conclusions and implications of key findings; systematic review registration number. | 2/3                |
| <b>INTRODUCTION</b>                |    |                                                                                                                                                                                                                                                                                                             |                    |
| Rationale                          | 3  | Describe the rationale for the review in the context of what is already known.                                                                                                                                                                                                                              | 5                  |
| Objectives                         | 4  | Provide an explicit statement of questions being addressed with reference to participants, interventions, comparisons, outcomes, and study design (PICOS).                                                                                                                                                  | 6                  |
| <b>METHODS</b>                     |    |                                                                                                                                                                                                                                                                                                             |                    |
| Protocol and registration          | 5  | Indicate if a review protocol exists, if and where it can be accessed (e.g., Web address), and, if available, provide registration information including registration number.                                                                                                                               | Not applicable     |
| Eligibility criteria               | 6  | Specify study characteristics (e.g., PICOS, length of follow-up) and report characteristics (e.g., years considered, language, publication status) used as criteria for eligibility, giving rationale.                                                                                                      | 7                  |
| Information sources                | 7  | Describe all information sources (e.g., databases with dates of coverage, contact with study authors to identify additional studies) in the search and date last searched.                                                                                                                                  | 6                  |
| Search                             | 8  | Present full electronic search strategy for at least one database, including any limits used, such that it could be repeated.                                                                                                                                                                               | 6                  |
| Study selection                    | 9  | State the process for selecting studies (i.e., screening, eligibility, included in systematic review, and, if applicable, included in the meta-analysis).                                                                                                                                                   | 6/7                |
| Data collection process            | 10 | Describe method of data extraction from reports (e.g., piloted forms, independently, in duplicate) and any processes for obtaining and confirming data from investigators.                                                                                                                                  | 7                  |
| Data items                         | 11 | List and define all variables for which data were sought (e.g., PICOS, funding sources) and any assumptions and simplifications made.                                                                                                                                                                       | 7                  |
| Risk of bias in individual studies | 12 | Describe methods used for assessing risk of bias of individual studies (including specification of whether this was done at the study or outcome level), and how this information is to be used in any data synthesis.                                                                                      | Not applicable     |
| Summary measures                   | 13 | State the principal summary measures (e.g., risk ratio, difference in means).                                                                                                                                                                                                                               | Not applicable     |
| Synthesis of results               | 14 | Describe the methods of handling data and combining results of studies, if done, including measures of consistency (e.g., $I^2$ for each meta-analysis).                                                                                                                                                    | Not applicable     |

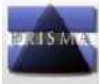

# PRISMA 2009 Checklist

Page 1 of 2

1  
2  
3  
4  
5  
6  
7  
8  
9  
10  
11  
12  
13  
14  
15  
16  
17  
18  
19  
20  
21  
22  
23  
24  
25  
26  
27  
28  
29  
30  
31  
32  
33  
34  
35  
36  
37  
38  
39  
40  
41  
42  
43  
44  
45  
46  
47  
48  
49

| Section/topic                 | #  | Checklist item                                                                                                                                                                                           | Reported on page #   |
|-------------------------------|----|----------------------------------------------------------------------------------------------------------------------------------------------------------------------------------------------------------|----------------------|
| Risk of bias across studies   | 15 | Specify any assessment of risk of bias that may affect the cumulative evidence (e.g., publication bias, selective reporting within studies).                                                             | Not applicable       |
| Additional analyses           | 16 | Describe methods of additional analyses (e.g., sensitivity or subgroup analyses, meta-regression), if done, indicating which were pre-specified.                                                         | Not applicable       |
| <b>RESULTS</b>                |    |                                                                                                                                                                                                          |                      |
| Study selection               | 17 | Give numbers of studies screened, assessed for eligibility, and included in the review, with reasons for exclusions at each stage, ideally with a flow diagram.                                          | 8, Figure 1          |
| Study characteristics         | 18 | For each study, present characteristics for which data were extracted (e.g., study size, PICOS, follow-up period) and provide the citations.                                                             | 8-11, 15, Tables 1-3 |
| Risk of bias within studies   | 19 | Present data on risk of bias of each study and, if available, any outcome level assessment (see item 12).                                                                                                | Not applicable       |
| Results of individual studies | 20 | For all outcomes considered (benefits or harms), present, for each study: (a) simple summary data for each intervention group (b) effect estimates and confidence intervals, ideally with a forest plot. | Tables 1-3           |
| Synthesis of results          | 21 | Present results of each meta-analysis done, including confidence intervals and measures of consistency.                                                                                                  | Not applicable       |
| Risk of bias across studies   | 22 | Present results of any assessment of risk of bias across studies (see Item 15).                                                                                                                          | Not applicable       |
| Additional analysis           | 23 | Give results of additional analyses, if done (e.g., sensitivity or subgroup analyses, meta-regression [see Item 16]).                                                                                    | Not applicable       |
| <b>DISCUSSION</b>             |    |                                                                                                                                                                                                          |                      |
| Summary of evidence           | 24 | Summarize the main findings including the strength of evidence for each main outcome; consider their relevance to key groups (e.g., healthcare providers, users, and policy makers).                     | 20-24                |
| Limitations                   | 25 | Discuss limitations at study and outcome level (e.g., risk of bias), and at review-level (e.g., incomplete retrieval of identified research, reporting bias).                                            | 20-22                |
| Conclusions                   | 26 | Provide a general interpretation of the results in the context of other evidence, and implications for future research.                                                                                  | 22-24                |
| <b>FUNDING</b>                |    |                                                                                                                                                                                                          |                      |
| Funding                       | 27 | Describe sources of funding for the systematic review and other support (e.g., supply of data); role of funders for the systematic review.                                                               | Not applicable       |

For more information, visit: [www.prisma-statement.org](http://www.prisma-statement.org).

Page 2 of 2

For peer review only - <http://bmjopen.bmj.com/site/about/guidelines.xhtml>

# BMJ Open

## Systematic review on the primary and secondary reporting of the prevalence of ghostwriting in the medical literature

|                                 |                                          |
|---------------------------------|------------------------------------------|
| Journal:                        | <i>BMJ Open</i>                          |
| Manuscript ID:                  | bmjopen-2013-004777.R1                   |
| Article Type:                   | Research                                 |
| Date Submitted by the Author:   | 14-Apr-2014                              |
| Complete List of Authors:       | Stretton, Serina; ProScribe,             |
| <b>Primary Subject Heading</b>: | Medical publishing and peer review       |
| Secondary Subject Heading:      | Ethics                                   |
| Keywords:                       | MEDICAL ETHICS, Ghostwriting, Authorship |
|                                 |                                          |

SCHOLARONE™  
Manuscripts

Review only

**TITLE**

Systematic review on the primary and secondary reporting of the prevalence of ghostwriting  
in the medical literature

**AUTHOR**

Serina Stretton, PhD CMPP

**AUTHOR'S AFFILIATION**

ProScribe – Envision Pharma Group, Sydney, NSW, Australia

**AUTHOR FOR CORRESPONDENCE**

Serina Stretton, PhD, CMPP

ProScribe – Envision Pharma Group

18 Poulet St

Matrville, NSW, 2036

AUSTRALIA

Tel: + 612 9661 0768

Fax: + 617 5474 9156

Email: serina.stretton@EnvisionPharmaGroup.com

**KEYWORDS**

Authorship, ghostwriting, systematic review

**WORD COUNT**

3,588

## ABSTRACT

**Background:** Ghostwriting of industry-sponsored articles is unethical and is perceived to be common practice.

**Objective:** To systematically review how evidence for the prevalence of ghostwriting is reported in the medical literature.

**Data sources:** MEDLINE via PubMed 1966+, EMBASE 1966+, The Cochrane Library 1988+, Medical Writing 1998+, The AMWA Journal 1986+, Council of Science Editors Annual Meetings 2007+, and the Peer Review Congress 1994+ were searched electronically (23 May 2013) using the search terms ghostwrit\*, ghostauthor\*, ghost AND writ\*, ghost AND author\*.

**Eligibility criteria:** All publication types were considered; only publications reporting a numerical estimate of possible ghostwriting prevalence were included.

**Data extraction:** Two independent reviewers screened the publications; discrepancies were resolved by consensus. Data to be collected included a numerical estimate of the prevalence of possible ghostwriting (primary outcome measure), definitions of ghostwriting reported, source of the reported prevalence, publication type and year, study design, and sample population.

**Results** Of the 848 publications retrieved and screened for eligibility, 48 reported numerical estimates for the prevalence of possible ghostwriting. Sixteen primary publications reported findings from cross-sectional surveys or descriptive analyses of published articles; 32 secondary publications cited published or unpublished evidence. Estimates on the prevalence of possible ghostwriting in primary and secondary publications varied markedly. Primary estimates were not suitable for meta-analysis because of the various definitions of ghostwriting used, study designs, and types of populations or samples. Secondary estimates were not always reported or cited correctly or appropriately.



1  
2  
3 **Conclusions** Evidence for the prevalence of ghostwriting in the medical literature is limited  
4 and can be outdated, misleading, or mistaken. Researchers should not inflate estimates  
5 using nonstandard definitions of ghostwriting nor conflate ghostwriting with other unethical  
6 authorship practices. Editors and peer reviewers should not accept articles that incorrectly  
7 cite or interpret primary publications that report the prevalence of ghostwriting.  
8  
9  
10  
11  
12  
13  
14  
15  
16  
17  
18  
19  
20  
21  
22  
23  
24  
25  
26  
27  
28  
29  
30  
31  
32  
33  
34  
35  
36  
37  
38  
39  
40  
41  
42  
43  
44  
45  
46  
47  
48  
49  
50  
51  
52  
53  
54  
55  
56  
57  
58  
59  
60

For peer review only

## Strengths

- First systematic review on the reporting of the prevalence of ghostwriting in the medical literature
- A broad search strategy was employed with few restrictions to minimize any potential for publication or language bias; there were no restrictions on language.
- All study designs and publication types were considered

## Limitations

- Study heterogeneity in the outcomes reported and populations investigated precluded synthesis of the data
- Retrospective and self-reported nature of the data collection increased the risk of selection bias in the studies
- Most included studies were not broadly representative of the peer-reviewed medical literature

## INTRODUCTION

Ghostwriting of peer-reviewed journal publications in the medical literature is believed to be common practice.[1-3] This belief is supported, to a large extent, by highly publicized cases, primarily from the 1990s and early 2000s, of pharmaceutical companies and authors who had used ghostwriters to prepare manuscripts for publication in medical journals.[4-6] Such cases are highly unethical because the role of the commercial sponsor and any other potential conflicts of interest were hidden.

Ghostwriting occurs when writing contributions to a manuscript that do not meet authorship criteria are not disclosed in the acknowledgments. This practice is distinct from ghost authoring, where contributions to a manuscript that do merit authorship are not disclosed in the author byline.[7] However, part of the challenge in understanding the prevalence of ghostwriting is the current confusion surrounding the two unethical practices. For example, the widely used Council of Science Editors definition of ghost authors (ie, individuals who participate in research, data analysis, and/or writing of a manuscript but are not named or disclosed in the author byline or acknowledgments) does not distinguish between ghost authors and ghostwriters.[8] Estimating the prevalence of ghostwriting has also been hindered by the failure of authors to distinguish ghostwriting, which is unethical, from professional medical writing support, which is ethical.[9, 10] Ghostwriters keep their involvement in a manuscript hidden, whereas professional medical writers disclose their involvement and follow ethical publication practices.[7, 9-11] Consistent with the authorship criteria recommended by the International Committee of Medical Journal Editors (ICMJE), professional medical writers who provide writing assistance and do not meet all of the ICMJE authorship criteria, should be acknowledged rather than listed as authors.[12] The prevalence of disclosed professional medical writing assistance in medical journals has been estimated to be between 6.0% and 11.0%[10, 13] and the legitimate value that this medical

1  
2  
3 writing assistance can bring to improving the quality, timeliness, and integrity of reporting in  
4  
5 medical journals has been demonstrated.[7, 14, 15] However, the exact prevalence of  
6  
7 ghostwriting and other forms of undisclosed contributions to papers published in medical  
8  
9 journals is unknown.

10  
11  
12  
13 The primary objective of this study was to conduct the first systematic review on how the  
14  
15 prevalence of ghostwriting is reported in the medical literature. The secondary objectives  
16  
17 were to assess the variability of the reported estimates of the prevalence of ghostwriting and  
18  
19 investigate the source for these estimates.  
20  
21  
22  
23  
24  
25  
26  
27  
28  
29  
30  
31  
32  
33  
34  
35  
36  
37  
38  
39  
40  
41  
42  
43  
44  
45  
46  
47  
48  
49  
50  
51  
52  
53  
54  
55  
56  
57  
58  
59  
60

## MATERIALS AND METHODS

### Literature search strategy

A search strategy was developed to retrieve publications from the medical literature that reported quantitative estimates of the prevalence of ghostwriting. The following databases were searched on 23 May 2013: MEDLINE via PubMed (1966+); EMBASE (1966+); The Cochrane Library, including the Cochrane Database of Systematic Reviews and Cochrane Central Register of Controlled Trials (1988+); The AMWA Journal (1986+, journal of the American Medical Writers Association); Medical Writing (1998+, journal of the European Medical Writers Association, formerly known as The Write Stuff); Council of Science Editors annual meetings (2007+); and the International Congress on Peer Review and Biomedical Publication meetings (1994+). General text was searched using the following search terms: ghostwrit\*, ghostauthor\*, ghost AND writ\*, ghost AND author\*. Truncation symbols and Boolean operators (AND, OR) were used wherever possible.

Two reviewers (SS, SMG) independently screened the title and abstracts of all retrieved publications using prespecified eligibility criteria; the full text of potentially eligible publications was screened to confirm eligibility for inclusion. Any discrepancies between the reviewers were resolved by consensus. The reference lists of relevant reviews and other publications were screened by hand to identify any additional publications for inclusion.

### Eligibility criteria

The eligibility criteria were prespecified. Publications were included if they reported a numerical estimate of the prevalence of possible ghostwriting. Publications were excluded if they were duplicate publications from different databases or abstracts of subsequently published full-text articles, did not report any outcomes related to ghostwriting, or reported

1  
2  
3 qualitative estimate(s) of the prevalence of possible ghostwriting. No restrictions on  
4  
5 language were included in the eligibility criteria.  
6  
7

### 8 9 **Data extraction and analysis**

10  
11 The primary and secondary outcomes and data to be collected were prespecified. Data to  
12  
13 be collected included publication type and year, study design and sample population,  
14  
15 definitions of ghostwriting reported, reported prevalence of possible ghostwriting, and the  
16  
17 source of the reported prevalence of ghostwriting. The prevalence of possible ghostwriting  
18  
19 was reported as published. No unpublished data from the retrieved literature were reported  
20  
21 and values for prevalence were not extrapolated from published data.  
22  
23

24  
25 The primary outcome measure for the systematic review was a numerical estimate of the  
26  
27 prevalence of possible ghostwriting. The reported definitions of possible ghostwriting were  
28  
29 categorized according to the following standard definitions, irrespective of the term used to  
30  
31 describe the practice in the publication. Undisclosed writing contributions to a manuscript  
32  
33 were defined as (i) ghostwriting if they were described as not meriting authorship and were  
34  
35 not listed in the acknowledgments[9, 16] and (ii) ghost authoring if they did merit authorship  
36  
37 and were not listed in the author byline.[7] Consistent with recommendations from  
38  
39 international medical journal editors,[12, 14] Good Publication Practice guidelines,[11] and  
40  
41 professional medical writing associations,[17, 18] disclosed writing contributions to a  
42  
43 manuscript that did not merit authorship and were disclosed in the acknowledgments were  
44  
45 not categorized as ghostwriting.  
46  
47

48  
49 The key factors considered when assessing study quality were study design, the population  
50  
51 assessed, and how ghostwriting was defined. While there is no consensus on the best  
52  
53 practice for reporting survey research,[19] the quality of the cross-sectional surveys was  
54  
55  
56  
57  
58  
59  
60

1  
2  
3  
4  
5  
6  
7  
8  
9  
10  
11  
12  
13  
14  
15  
16  
17  
18  
19  
20  
21  
22  
23  
24  
25  
26  
27  
28  
29  
30  
31  
32  
33  
34  
35  
36  
37  
38  
39  
40  
41  
42  
43  
44  
45  
46  
47  
48  
49  
50  
51  
52  
53  
54  
55  
56  
57  
58  
59  
60

determined by an assessment of the following factors: validation or pretesting of the survey questions, anonymity of the response, sample size, and response rate.

For peer review only

## RESULTS

### Publication selection

A total of 848 articles were retrieved from the literature search, 800 were excluded, and 48 met the eligibility criteria and were included in the systematic review (Figure 1). The main reasons for exclusion were publications not relevant to ghostwriting (n = 539), duplicate publications from different databases (n = 129), and publications not reporting a numerical estimate of the prevalence of possible ghostwriting (n = 124). The titles or abstracts of the 8 publications that were excluded because the full text or abstract could not be retrieved were reviewed; none were considered to report a numerical estimate of the prevalence of possible ghostwriting. Overall, eligible publications included 16 primary publications that reported original research on the prevalence of possible ghostwriting and 32 secondary publications that cited published or unpublished evidence of possible ghostwriting.

### Primary publications

#### Publication characteristics

Of the 16 primary publications (Table 1), there were 13 full-text publications[4, 6, 20-30] and three conference abstracts[31-33] that reported a numerical estimate of possible ghostwriting. Twelve publications[20-28, 31-33] reported findings from cross-sectional surveys and four publications[4, 6, 29, 30] reported findings from descriptive analyses of published articles. Most cross-sectional surveys were reasonably well reported. The surveys used were not validated but most included pretested questions, required an anonymous response, were conducted in targeted populations (ie, all individuals invited to participate were involved in the preparation of peer-reviewed manuscripts), and reported a sample size and response rate. Of the cross-sectional surveys conducted in targeted populations (eg, corresponding or first authors), six had response rates greater than 50%, two had response rates less than 50%, and one did not report a response rate (Table 1). Of the cross-sectional



**Table 1.** Characteristics of Primary Publications Reporting Original Evidence of Ghostwriting

| Publication                                                                     | Population                                  | Survey description                                                 | Data collected    | N          | RR               |
|---------------------------------------------------------------------------------|---------------------------------------------|--------------------------------------------------------------------|-------------------|------------|------------------|
| <b><i>Cross-sectional surveys – authors or corresponding authors</i></b>        |                                             |                                                                    |                   |            |                  |
| Flanagin<br>1998[27]                                                            | 6 general medicine<br>journals <sup>a</sup> | Self-administered, postal,<br>anonymous, pretested, targeted       | 1996              | 809        | 69%              |
| Mowatt<br>2002[23]                                                              | Published Cochrane<br>reviews               | Self-administered, online,<br>anonymous, pretested, targeted       | 1999              | 362        | 63%              |
| Hao 2009[32]<br>(Abstract)                                                      | Chin Med J                                  | Self-administered, email, not<br>anonymous, targeted               | 2008 <sup>c</sup> | 220        | 86%              |
| Dotson<br>2011[28]                                                              | 3 pharmacy journals                         | Self-administered, online,<br>anonymous, pretested, targeted       | 2009              | 112        | 25%              |
| Mirzazadeh<br>2011[24]                                                          | 3 Iranian journals                          | Self-administered, email, not<br>anonymous, targeted               | 2009-<br>2010     | NR         | NR               |
| Wislar<br>2011[20]                                                              | 6 general medicine<br>journals <sup>b</sup> | Self-administered, online,<br>anonymous, pretested, targeted       | 2008              | 622        | 70%              |
| Ghajarzadeh<br>2012[26]                                                         | Arch Iran Med (based<br>on student theses)  | Self-administered, email,<br>anonymous, targeted                   | 2005-<br>2007     | 30         | 49%              |
| Vinther<br>2012[21]                                                             | Ugeskr Laeger & Dan<br>Med J                | Self-administered, online,<br>anonymous, pretested, targeted       | 2010              | 272        | 62%              |
| <b><i>Cross-sectional surveys – healthcare professionals</i></b>                |                                             |                                                                    |                   |            |                  |
| Price 2000[22]                                                                  | Health academic staff                       | Self-administered, postal,<br>anonymous, pretested, targeted       | NR                | 166        | 59%              |
| Rees 2013[31]<br>(Abstract)                                                     | Registered users of<br>EPG Online           | Self-administered, online,<br>anonymous, nontargeted               | NR                | 295        | NR               |
| <b><i>Cross-sectional surveys – members of medical writing associations</i></b> |                                             |                                                                    |                   |            |                  |
| Jacobs<br>2009[25]                                                              | EMWA / AMWA<br>members                      | Self-administered, online,<br>anonymous, pretested,<br>nontargeted | 2005<br>2008      | 843<br>773 | 28%<br>14%       |
| Hamilton                                                                        | EMWA / AMWA                                 | Self-administered, online,                                         | 2011              | 620        | 12% <sup>d</sup> |

2012[33] members anonymous, pretested,  
(Abstract) nontargeted

---

**Publication reviews and descriptive analysis**

|                      |                                                                       |    |               |     |    |
|----------------------|-----------------------------------------------------------------------|----|---------------|-----|----|
| Healy 2003[4]        | Articles on sertraline                                                | NA | 1998-<br>2000 | 96  | NA |
| Gøtzsche<br>2007[30] | Articles on Danish<br>industry-initiated trials<br>approved 1994-1995 | NA | NR            | 44  | NA |
| Ross 2008[6]         | Reviews on rofecoxib<br>associated with Merck<br>support              | NA | 1996-<br>2004 | 72  | NA |
| Suda 2011[29]        | Noninferiority clinical<br>trials                                     | NA | 1989-<br>2009 | 583 | NA |

<sup>a</sup> Annals of Internal Medicine, JAMA, the New England Journal of Medicine, American Journal of Cardiology, American Journal of Medicine, American Journal of Obstetrics and Gynecology.

<sup>b</sup> Annals of Internal Medicine, JAMA, the New England Journal of Medicine, Lancet, Nature Medicine, PLoS Medicine.

<sup>c</sup> Submission date.

<sup>d</sup> Personal communication, C. Hamilton.

Abbreviations: AMWA, American Medical Writers Association; EMWA, European Medical Writers Association; NA, not applicable; NR, not reported; RR, response rate.

surveys conducted in nontargeted populations (eg, individuals invited to participate who may or may not have been involved in providing medical writing assistance for peer-reviewed publications), three had low (12% to 28%) response rates and one did not report a response rate (Table 1).

Not all cross-sectional surveys were broadly representative of the peer-reviewed medical literature. The cross-sectional surveys were conducted in single populations of academic staff or healthcare professionals[22, 31], members of medical writing associations[25, 33], or

1  
2  
3 corresponding or first authors. The corresponding or first authors were surveyed from single  
4  
5 journals (Cochrane reviews, Chinese Medical Journal, Archives of Iranian Medicine),[23, 26,  
6  
7 32] two Danish journals,[21] three Iranian journals,[24] and three pharmacy journals.[28] Two  
8  
9 cross-sectional surveys of corresponding authors were conducted in six general medicine  
10  
11 journals.[20, 27]  
12

13  
14  
15 The descriptive analyses of published articles were conducted in single populations and  
16  
17 included an analysis of sertraline publications from 1998 to 2000,[4] rofecoxib reviews from  
18  
19 1996 to 2004,[6] publications from industry-initiated trials in Denmark from 1994 to 1995,[30]  
20  
21 and from published noninferiority trials from 1989 to 2009.[29]  
22

#### 23 24 25 Reported prevalence of ghostwriting

26  
27 The reported prevalence of possible ghostwriting in the primary publications varied markedly  
28  
29 and were not suitable for meta-analysis because of the different populations assessed, the  
30  
31 different methods used to generate the estimates, and the various definitions that were used  
32  
33 (Tables 1 and 2). All cross-sectional surveys reported a definition of ghostwriting or ghost  
34  
35 authoring, but most definitions did not differentiate contributions that merited authorship from  
36  
37 those that did not merit authorship (Table 2).  
38

39  
40  
41 Four cross-sectional surveys reported the prevalence of ghostwriting where the definition  
42  
43 provided could be categorized as undisclosed contributions that do not merit authorship.[20,  
44  
45 25, 27, 33] Findings from these surveys, which were repeated at different time points,  
46  
47 suggested that the prevalence of ghostwriting is low and decreasing. Flanagin[27] and  
48  
49 Wislar[20] conducted two similar cross-sectional surveys of corresponding authors of articles  
50  
51 published in six general medicine journals in 1996[27] and in 2008.[20] The surveys, which  
52  
53 included a core set of three journals (Annals of Internal Medicine, JAMA, the New England  
54  
55 Journal of Medicine) at each time point and in targeted populations, used pretested  
56  
57  
58  
59  
60

**Table 2.** Primary Publications Reporting Estimates of the Prevalence of Possible Ghostwriting

| Publication                                                                               | Measure of Possible Ghostwriting Reported by Authors                                                                                                                             | Estimate % (n)                                                                       |
|-------------------------------------------------------------------------------------------|----------------------------------------------------------------------------------------------------------------------------------------------------------------------------------|--------------------------------------------------------------------------------------|
| <b><i>Cross-sectional surveys reporting ghostwriting</i></b>                              |                                                                                                                                                                                  |                                                                                      |
| Flanagin 1998[27]                                                                         | Unnamed individual who participated in the writing                                                                                                                               | 1.4% (11/809) of articles                                                            |
| Wislar 2011[20]                                                                           | Unnamed individual who participated in the writing                                                                                                                               | 0.2% <sup>a</sup> (1/622) of articles                                                |
| Jacobs 2009,<br>Hamilton 2012[25,<br>33]                                                  | Undisclosed medical writing assistance not qualifying for authorship                                                                                                             | 2005: 61.8% (NR)<br>2009: 41.7% (NR)<br>2011: 33.0% (NR)<br>of articles <sup>b</sup> |
| <b><i>Cross-sectional surveys reporting combined ghost authoring and ghostwriting</i></b> |                                                                                                                                                                                  |                                                                                      |
| Flanagin 1998[27]                                                                         | Failure to name, as an author, individuals who made substantial contributions to the research or writing or an unidentified medical writer                                       | 11.5% (93/809) of articles                                                           |
| Price 2000[22]                                                                            | Failure to name, as an author, individuals who made substantial contributions to the research or writing                                                                         | 24.1% (40/166) of authors                                                            |
| Mowatt 2002[23]                                                                           | Individual merited authorship or had assisted with drafting but not listed as an author or acknowledged                                                                          | 8.8% (32/362) of articles                                                            |
| Hao 2009[32]                                                                              | English-language speakers assisted with writing but not identified as authors or acknowledged                                                                                    | 10.4% (NR) of authors                                                                |
| Dotson 2011[28]                                                                           | Failure to name, as an author, individuals who made substantial contributions to the research or writing                                                                         | 0.9% (1/112) of articles                                                             |
| Wislar 2011[20]                                                                           | Failure to name, as an author, individuals who made substantial contributions to the research or writing of the article or an unnamed individual who participated in the writing | 7.9% (49/622) of articles                                                            |
| <b><i>Cross-sectional surveys reporting ghost authoring</i></b>                           |                                                                                                                                                                                  |                                                                                      |
| Mirzazadeh<br>2011[24]                                                                    | Failure to name, as an author, individuals who made substantial contributions to the research                                                                                    | 21.4% (25/NR) of authors                                                             |
| Ghajarzadeh                                                                               | Failure to name, as an author, students who made substantial                                                                                                                     | 0.7% (2/296) of                                                                      |

|                  |                                                           |                                   |
|------------------|-----------------------------------------------------------|-----------------------------------|
| 2012[26]         | contributions to the research <sup>c</sup>                | articles                          |
| Vinther 2012[21] | Individual merited authorship but not listed as an author | 2.4% (6/245) of articles          |
| Rees 2013[31]    | Individual merited authorship but not listed as an author | 70% (NR/202) of published authors |

---

***Publication reviews and descriptive analysis reporting possible ghost authoring or ghostwriting***

|                   |                                                                                                                                                                                                                                 |                           |
|-------------------|---------------------------------------------------------------------------------------------------------------------------------------------------------------------------------------------------------------------------------|---------------------------|
| Healy 2003[4]     | Published articles coordinated by a medical information company, including acknowledged medical writing support <sup>d</sup>                                                                                                    | 57.3% (55/96) of articles |
| Gøtzsche 2007[30] | Individuals who wrote the trial protocol, conducted the statistical analyses, or wrote the manuscript but were not listed as authors, not members of a study group or steering committee, or not disclosed in an acknowledgment | 75.0% (33/44) of trials   |
| Ross 2008[6]      | Published reviews associated with Merck support and with a single external author <sup>e</sup>                                                                                                                                  | 69.4% (50/72) of reviews  |

---

<sup>a</sup> Available as online supplementary data.

<sup>b</sup> Values represent the mean weighted percentage of publications that were ghostwritten by respondents. Findings were weighted in proportion to the number of manuscripts the respondent wrote per year.

<sup>c</sup> Students were classified as ghostwriters if the student was not named as an author and if the results reported in the publications were based on the results of their theses.

<sup>d</sup> Authors conclude data provide quantification of the possible extent of ghostwriting based on a single drug. Of the 55 published articles that were coordinated through a medical information company, 2 included medical writing assistance that was acknowledged in the published article.

<sup>e</sup> Published review articles had been identified from correspondence between Merck and a medical publishing company, from Merck publication status reports, or were affiliated with an author named within the correspondence or publication status reports. The authors did not report whether medical writing assistance was acknowledged in the published article.

Abbreviations: NR, not reported.

1  
2  
3 questions that required an anonymous response and had response rates greater than 65%.  
4  
5 The prevalence of ghost authoring (which included ghostwriting) was estimated to be 11.5%  
6  
7 in 1996 and 7.9% in 2008. The prevalence of ghostwriting from these surveys was estimated  
8  
9 to be 1.4% in 1996 and 0.2% in 2008. Hamilton and Jacobs conducted a cross-sectional  
10  
11 survey of members of two medical writing associations in 2005, 2008, and 2011.[25, 33] The  
12  
13 survey, which was not conducted in targeted populations, used pretested questions that  
14  
15 required an anonymous response and had response rates from 12% to 28% of the total  
16  
17 population surveyed (ie, not all participants surveyed were involved in the preparation of  
18  
19 peer-reviewed manuscripts). Findings from these surveys showed that the mean weighted  
20  
21 percentage of publications that were ghostwritten by respondents had decreased from  
22  
23 61.8% in 2005 to 33.0% in 2011. Findings were weighted in proportion to the number of  
24  
25 manuscripts the respondent wrote per year.  
26  
27

28  
29 Six cross-sectional survey publications reported the prevalence of possible ghostwriting (ie,  
30  
31 the prevalence of ghostwriting and ghost authoring combined).[20, 22, 23, 27, 28, 32] The  
32  
33 prevalence of possible ghostwriting reported in these cross-sectional surveys varied from  
34  
35 0.9% to 24.1% of publications or authors.  
36  
37

38  
39 Four cross-sectional survey publications reported the prevalence of ghost authoring.[21, 24,  
40  
41 26, 31] The prevalence of ghost authoring reported in these cross-sectional surveys varied  
42  
43 from 0.7% to 70% of publications or authors.  
44  
45

46  
47 The descriptive analyses of published articles on sertraline and rofecoxib did not include a  
48  
49 prespecified definition of ghost authoring or ghostwriting;[4, 6] in these studies, possible  
50  
51 ghostwriting or ghost authoring was assumed in publications associated with industry-  
52  
53 sponsored support (Table 2). The descriptive analysis of industry-initiated trials in Denmark  
54  
55 used a nonstandard definition of ghost authors; in this study ghost authors were defined as  
56  
57 individuals, not named as authors, who were involved in writing the protocol, conducting the  
58  
59

1  
2  
3 statistical analyses, or writing the manuscript.[30] The prevalence of possible ghostwriting in  
4  
5 the two descriptive analyses of single drugs that did not include a prespecified definition of  
6  
7 ghostwriting was 57% of articles on sertraline published from 1998 to 2000[4] and 69% of  
8  
9 reviews on rofecoxib published from 1996 to 2004.[6] The prevalence of possible  
10  
11 ghostwriting in the descriptive analysis of Danish industry-initiated trials, which used a  
12  
13 nonstandard definition of authorship, was 75% of Danish initiated trials approved in 1994 to  
14  
15 1995.[30] The descriptive analysis of noninferiority trials[29] was not considered further as  
16  
17 the definition of ghostwriting used was consistent with disclosed medical writing assistance.  
18  
19 In this study ghostwriters were defined as acknowledged individuals, other than authors, who  
20  
21 contributed to the writing and were affiliated with an industry-sponsored study.[29] The  
22  
23 prevalence of disclosed medical writing assistance in this descriptive analysis was 17.3%  
24  
25 (101/583) of clinical trials.  
26  
27  
28  
29

## 30 **Secondary publications**

### 31 Publication characteristics

32  
33 Of the 32 secondary publications, there were 13 review articles, 10 editorials, 5  
34  
35 commentaries, 3 news articles, and 1 government report, with most being published after  
36  
37 2008 (Table 3). Most publications cited primary sources as evidence of the prevalence of  
38  
39 possible ghostwriting (Table 3), with the cited prevalence of possible ghostwriting varying  
40  
41 from 6% of publications to 100% of publications involving drugs. In most secondary  
42  
43 publications, the information on the prevalence of ghostwriting was not reported consistently  
44  
45 compared with the cited evidence (Table 3). Misleading and mistaken information was  
46  
47 reported in many publications that (i) did not distinguish between ghostwriting and ghost  
48  
49 authoring, (ii) included acknowledged medical writing assistance or a combined estimate of  
50  
51 guest authorship and ghost authorship as ghostwriting, (iii) generalized findings from  
52  
53 publication reviews and analyses of specific datasets to wider populations of publications or  
54  
55  
56  
57  
58  
59  
60

**Table 3.** Characteristics of Secondary Publications Citing Evidence of Possible Ghostwriting

| Publication                                 | Cited evidence         | Consistent with cited source(s) | Comment                                                                              |
|---------------------------------------------|------------------------|---------------------------------|--------------------------------------------------------------------------------------|
| Elliot Hastings Cent Rep 2004[35]           | Primary                | No                              | Did not distinguish GW from GA                                                       |
| Moffat Perspect Biol Med 2007[36]           | Primary                | No                              | Did not distinguish GW from GA                                                       |
| Schiefe Pharmacotherapy 2009[47]            | Primary                | No                              | Did not distinguish GW from GA                                                       |
| MacLennan Climacteric 2010[48]              | Primary                | No                              | Did not distinguish GW from GA                                                       |
| Nahai Aesthet Surg J 2010[49]               | Secondary              | No                              | Did not distinguish GW from GA                                                       |
| Ngai Account Res 2005[50]                   | Primary                | Yes                             | Did not distinguish GW from GA                                                       |
| Bosch EMBO Rep 2011[43]                     | Primary                | Yes                             | Did not distinguish GW from GA                                                       |
| Wiwanitkit Am J Med 2012[51]                | Primary                | No                              | Did not distinguish GW from GA<br>or GA from guest authorship                        |
| Krimsky Med Law 2007[52]                    | Primary                | No                              | Did not distinguish GW from GA<br>or GA from guest authorship                        |
| Langdon-Neuner Mens Sana Monogr<br>2008[53] | Primary &<br>secondary | No                              | Did not distinguish GW from GA<br>or GW from disclosed medical<br>writing support    |
| Tharyan Indian J Med Ethics 2011[45]        | Primary                | Yes                             | Did not distinguish GW from GA<br>or GW from disclosed medical<br>writing assistance |
| Paul Clin Microbiol Infect 2009[54]         | Primary                | Yes                             | Did not distinguish GW / GA<br>from disclosed medical writing<br>assistance          |
| Bavdekar Lung India 2012[42]                | Primary                | No                              | Did not distinguish GW from GA<br>and generalized evidence to a<br>wider population  |
| Górski Transplant Proc 2010[55]             | Primary &<br>secondary | No                              | Did not distinguish GW from GA<br>and generalized evidence to a<br>wider population  |



|    |                                       |             |         |                                 |
|----|---------------------------------------|-------------|---------|---------------------------------|
| 1  |                                       |             |         |                                 |
| 2  |                                       |             |         |                                 |
| 3  | Matias-Guiu Neurologia 2011[44]       | Primary &   | No      | Did not distinguish GW from GA  |
| 4  |                                       | secondary   |         | and generalized evidence to a   |
| 5  |                                       |             |         | wider population                |
| 6  |                                       |             |         |                                 |
| 7  |                                       |             |         |                                 |
| 8  | McHenry Mens Sana Monogr 2010[56]     | Gov. report | No      | Generalized evidence to a wider |
| 9  |                                       |             |         | population                      |
| 10 |                                       |             |         |                                 |
| 11 | Healy BMJ 2004[57]                    | Primary &   | No / ND | Generalized evidence to a wider |
| 12 |                                       | secondary   |         | population and reported         |
| 13 |                                       |             |         | personal opinion of GW          |
| 14 |                                       |             |         | prevalence                      |
| 15 |                                       |             |         |                                 |
| 16 | Abbasi BMJ 2004[2]                    | Secondary   | No      | Secondary publication cited     |
| 17 |                                       |             |         | named individual                |
| 18 |                                       |             |         |                                 |
| 19 | Mitrany Science Editor 2005[58]       | None        | ND      | Cited named individual          |
| 20 |                                       |             |         |                                 |
| 21 | Collier Can Med Assoc J 2009[3]       | None        | ND      | Cited named individual          |
| 22 |                                       |             |         |                                 |
| 23 | Kmietowicz BMJ 2004[59]               | None        | ND      | Cited named individual          |
| 24 |                                       |             |         |                                 |
| 25 | Matthews Wall St J 2005[1]            | None        | ND      | Cited unpublished data          |
| 26 |                                       |             |         |                                 |
| 27 | Bonita Heart Fail Clin 2011[60]       | Primary     | Yes     | Consistent with cited source    |
| 28 |                                       |             |         |                                 |
| 29 | Grassley Int J Occup Environ Health   | Primary     | Yes     | Consistent with cited source    |
| 30 | 2011[61]                              |             |         |                                 |
| 31 |                                       |             |         |                                 |
| 32 | Nat Clin Pract Nephrol 2007[62]       | Primary     | Yes     | Consistent with cited source    |
| 33 |                                       |             |         |                                 |
| 34 | Editors J Urol 2008[15]               | Primary     | Yes     | Consistent with cited source    |
| 35 |                                       |             |         |                                 |
| 36 | Baethge Deutsches Arzteblatt 2009[63] | Primary     | Yes     | Consistent with cited source    |
| 37 |                                       |             |         |                                 |
| 38 | Flanagin CSE Annual Mtg 2010[64]      | Primary     | Yes     | Consistent with cited source    |
| 39 |                                       |             |         |                                 |
| 40 | Murray Open Med 2010[65]              | Primary     | Yes     | Consistent with cited source    |
| 41 |                                       |             |         |                                 |
| 42 | Moore BMJ 2004[66]                    | Secondary   | Yes     | Consistent with cited source    |
| 43 |                                       |             |         |                                 |
| 44 | Hargreaves BMJ 2007[67]               | Primary     | Yes     | Consistent with cited source    |
| 45 |                                       |             |         |                                 |
| 46 | Jones Nature 2009[68]                 | Primary     | Yes     | Consistent with cited source    |
| 47 |                                       |             |         |                                 |
| 48 |                                       |             |         |                                 |
| 49 |                                       |             |         |                                 |
| 50 |                                       |             |         |                                 |

Abbreviations: CSE, Council of Science Editors; GA, ghost authoring; Gov, government; GW, ghostwriting; ND, not determined.

industry-sponsored trials, or (iv) cited personal communications or informal surveys where the original source was unpublished and could not be verified (Table 3).

1  
2  
3  
4  
5 Case study of misleading and mistaken evidence  
6

7 An analysis of secondary publications citing the possible prevalence of ghostwriting in  
8 sertraline publications provides an illuminating case study on how misleading or mistaken  
9 evidence can enter and remain in the medical literature. In 2003, Healy and Cattell showed  
10 that 57% (55/96) of articles on sertraline published from 1998 to 2000 were coordinated  
11 through a medical information company and only two acknowledged medical writing  
12 assistance.[4] The authors concluded that these data provided information on the “possible  
13 extent of ghostwriting based on a single drug”. In 2004 (October 14), Healy also provided  
14 evidence on the influence of the pharmaceutical industry on key groups at a United Kingdom  
15 House of Commons Health Select Committee investigation.[34] In answer to Question 197,  
16 Healy stated the following:  
17  
18  
19  
20  
21  
22  
23  
24  
25  
26  
27  
28

29 *“My estimate is that, even in journals like the BMJ, the Lancet, the New England Journal of*  
30 *Medicine and JAMA, the leading journals in the field, if these articles have to do with*  
31 *therapeutics, with drugs, it may be worse perhaps for psychiatry than elsewhere, but I doubt*  
32 *it, 50% of these articles are ghostwritten. It may be higher.”*  
33  
34  
35  
36  
37  
38

39 Healy and Cattell’s original evidence has been cited incorrectly and interchangeably with  
40 Healy’s statement to the House of Commons Health Select Committee investigation (Figure  
41 2). Although findings from the primary publication have been cited and interpreted correctly  
42 in two secondary publications,[35, 36] many secondary publications incorrectly cited Healy’s  
43 original evidence and statement to the House of Commons Health Select Committee  
44 investigation (Figure 2).  
45  
46  
47  
48  
49  
50  
51  
52  
53  
54  
55  
56  
57  
58  
59  
60

## DISCUSSION

This systematic review on the reported prevalence of ghostwriting in the medical literature showed that the estimates of the prevalence of ghostwriting in primary publications varied markedly and were influenced by the definitions used, the types of study designs, and the type of population or sample assessed. In addition, secondary publications often cited outdated, misleading, or mistaken evidence of the reported prevalence of ghostwriting, with many publications not distinguishing ghostwriting from ghost authoring.

Although evidence from descriptive analyses can highlight the extent of ghostwriting in single populations, evidence from well-conducted cross-sectional surveys have the potential to provide estimates of the prevalence of ghostwriting that may be generalized to the majority of peer-reviewed publications. Despite this, many of the cross-sectional surveys retrieved in this systematic review were conducted in limited populations that were not broadly representative of the peer-reviewed medical literature. In addition, many of the cross-sectional surveys did not differentiate between contributions that merited authorship from those that did not merit authorship and provided at best, an estimate of possible ghostwriting. The reported prevalence of ghostwriting, where ghostwriting was defined as undisclosed contributions that did not merit authorship, was retrieved from the two cross-sectional surveys of corresponding authors from several general medicine journals and by cross-sectional surveys (repeated on three separate occasions from 2005 to 2011) of members of two major medical writing associations. Together the findings from these surveys suggested that the prevalence of ghostwriting has decreased in recent years. However, while the findings from these surveys may be considered more broadly representative of the peer-reviewed medical literature than surveys focused on single journals, single countries, or single subject areas, interpretation of these findings should take

1  
2  
3 into account that respondents were required to retrospectively self-report potentially  
4 unethical or unprofessional behaviour.  
5  
6  
7

8  
9 Unethical authorship practices are a major concern and are an increasingly recognized  
10 problem in the medical literature.[37] As the findings from this systematic review suggest,  
11 some of these perceived problems may arise from the considerable, but unnecessary,  
12 confusion and disagreement surrounding the definitions of ghostwriting. As recognized by  
13 the World Association of Medical Editors, professional medical writers can have a legitimate  
14 role in assisting authors to communicate their research findings in the peer-reviewed  
15 literature.[14] Professional medical writers can and do improve the timeliness and quality of  
16 reporting and can assist investigators and industry sponsors to meet their ethical  
17 commitments to the disclosure and publishing of clinical trial results.[7, 38-40] As such, the  
18 misleading and mistaken reporting of the prevalence of ghostwriting that was evident in the  
19 secondary publications retrieved in this systematic review is disappointing. Specifically, the  
20 confusion surrounding definitions of ghost authorship and ghostwriting and the unbalanced  
21 focus on industry as the source of unethical authorship practices in the secondary  
22 publications takes attention away from the need to focus on all types of unethical  
23 contributions in peer-reviewed publications, irrespective of the source of the unethical  
24 practice.  
25  
26  
27  
28  
29  
30  
31  
32  
33  
34  
35  
36  
37  
38  
39  
40  
41  
42

43 The strengths of this systematic review are that a broad search strategy was employed with  
44 few restrictions to minimize any potential for publication or language bias. All study designs  
45 and publication types were considered and there were no restrictions on language. Although  
46 the full text or abstracts of 8 publications could not be retrieved, omission of these  
47 publications was unlikely to have biased the findings. Review of the abstracts or titles of  
48 these publications suggested that none reported numerical estimates of the prevalence of  
49 ghostwriting. The major finding of this review was the limitations of the reported evidence of  
50 ghostwriting in the medical literature. These limitations included the heterogeneity among the  
51  
52  
53  
54  
55  
56  
57  
58  
59  
60

1  
2  
3 studies in the outcomes reported and populations investigated, the observational study  
4 designs, and the retrospective nature of data collection. Given the nature of unethical  
5 authorship practices, it may not be feasible to conduct a prospective study on ghostwriting.  
6  
7 However, based on the findings from this review, recommendations can be made to help  
8  
9 researchers, authors, editors, and peer-reviewers apply the same rigorous standards that  
10  
11 are applied to the conduct and assessment of all clinical research and actively improve the  
12  
13 quality of reporting of the evidence of unethical authorship practices.  
14  
15

16  
17  
18  
19 Researchers should use a standard definition of ghostwriting so that the confusion around  
20  
21 ghostwriters and ghost authors is not perpetuated. Ghostwriting is paid or unpaid writing  
22  
23 assistance by individuals who generally do not merit authorship and whose contributions are  
24  
25 not disclosed in the acknowledgments.[7] In contrast, ghost authoring is contributions to the  
26  
27 research, data analysis, and/or writing of a manuscript by individuals who do merit  
28  
29 authorship and whose contributions are not disclosed in the author byline.[7] For example,  
30  
31 the descriptive analysis of Danish industry-initiated trials used a nonstandard definition of  
32  
33 authorship, which is likely to have contributed to the very high prevalence of possible  
34  
35 ghostwriting reported in this study (75%). In this study, Gøtzsche et al.[30] suggested that  
36  
37 individuals who write the trial protocol, conduct the statistical analyses, or who contribute to  
38  
39 the writing of a publication should be included as authors. Indeed, the prevalence of ghost  
40  
41 authorship in this study was 91% when the analyses included these individuals, irrespective  
42  
43 of whether they had been appropriately acknowledged elsewhere. Given that the Gøtzsche  
44  
45 et al.[30] study has been downloaded more than 3,000 times since publication[41] and cited  
46  
47 repeatedly as evidence not only of ghost authorship but also of ghostwriting,[42-45] it would  
48  
49 have been illuminating if the authors had included an estimate of the prevalence of  
50  
51 ghostwriting using standard definitions for comparison. In addition to using standard  
52  
53 definitions of ghostwriting, researchers and authors should ensure that cited evidence of  
54  
55 ghostwriting is reported accurately without unwarranted generalizations. Publications based  
56  
57 on personal commentary should be avoided and studies that use nonstandard definitions,  
58  
59

1  
2  
3 specific populations, or that were conducted before a change in practice (eg, before the  
4 adoption of the Good Publication Practice guidelines for communicating company sponsored  
5 research in 2003 [GPP][46] and in 2009 [GPP2][11]) should be described in context.  
6  
7  
8  
9

10  
11 Editors and peer reviewers have a duty to prevent outdated, misleading, or mistaken  
12 evidence on the prevalence of ghostwriting from being published and perpetuated. Close  
13 attention should be paid to the internal and external validity of the study, the definitions used,  
14 how the data are reported, and whether the data are interpreted within the context of current  
15 practices. When assessing a submitted manuscript on ghostwriting, editors should consider  
16 using peer reviewers with expertise in the appropriate study designs (eg, survey research)  
17 and ethical publication practices. Collectively, these actions could help prevent further  
18 questionable evidence on the prevalence of ghostwriting from being published.  
19  
20  
21  
22  
23  
24  
25  
26  
27  
28

29 In conclusion, the findings from this systematic review showed that reports of the prevalence  
30 of ghostwriting in the medical literature are limited by the varied definitions used to describe  
31 unethical authorship practices, the types of study designs employed, and the populations  
32 assessed. To improve reporting, researchers should not inflate estimates using nonstandard  
33 definitions of ghostwriting nor conflate ghostwriting with other unethical authorship practices.  
34 While open and transparent debate should be encouraged, editors and peer reviewers  
35 should not accept articles that incorrectly cite or interpret primary publications that report the  
36 prevalence of ghostwriting.  
37  
38  
39  
40  
41  
42  
43  
44  
45  
46  
47  
48  
49  
50  
51  
52  
53  
54  
55  
56  
57  
58  
59  
60

## ACKNOWLEDGMENTS

The author, SS, contributed to the conception and design of the systematic literature review, the collection and screening of publications, and the analysis and interpretation of the findings. SS drafted and critically revised draft versions of the manuscript and gave final approval for submission.

The author acknowledges and thanks Sericka McGee, PharmD, Hamilton House, for her contributions to the conception and design of the systematic literature review and the collection and screening of articles for inclusion. Sericka McGee contributed to an earlier version of the systematic review (search dates 1966 to May 2011), which was presented at the 8th Annual Meeting, International Society for Medical Publication Professionals, 23-25 Apr 2012 and at the 72<sup>nd</sup> Annual Conference, American Medical Writers Association, 4-6 Oct 2012, Sacramento, USA. The author thanks Professor Karen Woolley, PhD, CMPP (ProScribe – Envision Pharma Group) and Dr Cindy Hamilton, PharmD, ELS (Hamilton House) for their stimulating and valuable contributions to the interpretation of the findings from this study and for their critical review during the drafting of the manuscript.

## COMPETING INTERESTS

The author is a professional medical writer who is actively involved in national and international not-for-profit organizations that encourage ethical medical writing practices. The author has no relationships with any pharmaceutical company that might have an interest in the submitted work and has no other relationships that could be construed as a competing interest.

**FUNDING**

The author was supported (eg, reimbursement of expenses for conference travel) by her employer, ProScribe – Envision Pharma Group, for the submitted work. No other funding was received to conduct this research.

**DATA SHARING STATEMENT**

All data associated with the study are fully available to the author.

For peer review only



**REFERENCES**

1. Mathews AW. Ghost story: at medical journals, writers paid by industry play big role. *Wall St J (East Ed)* 2005:A1, A8.
2. Abbasi K. Editor's choice: Transparency and trust. *BMJ* 2004;**329**:0.8.
3. Collier R. Prevalence of ghostwriting spurs calls for transparency. *Can Med Assoc J* 2009;**181**:E161-2.
4. Healy D, Cattell D. Interface between authorship, industry and science in the domain of therapeutics. *Br J Psychiatry* 2003;**183**:22-7.
5. PLoS Med Editors. Ghostwriting: The dirty little secret of medical publishing that just got bigger. *PLoS Med* 2009;**6**:e1000156.
6. Ross JS, Hill KP, Egilman DS, *et al*. Guest authorship and ghostwriting in publications related to rofecoxib: A case study of industry documents from rofecoxib litigation. *JAMA* 2008;**299**:1800-12.
7. Woolley KL, Gertel A, Hamilton CW, *et al*. Time to finger point or fix? An invitation to join ongoing efforts to promote ethical authorship and other good publication practices. *Ann Pharmacother* 2013;**47**:1084-7.
8. Scott-Lichter D and the Editorial Policy Committee of the Council of Science Editors. CSE's White Paper on Promoting Integrity in Scientific Journal Publications, 2012 Update. Wheat Ridge, CO: 2012. [http://www.councilscienceeditors.org/files/public/entire\\_whitepaper.pdf](http://www.councilscienceeditors.org/files/public/entire_whitepaper.pdf) (accessed 30 December 2013).
9. Gøtzsche PC, Kassirer JP, Woolley KL, *et al*. What should be done to tackle ghostwriting in the medical literature? *PLoS Med* 2009;**6**:e23.
10. Woolley KL, Ely JA, Woolley MJ, *et al*. Declaration of medical writing assistance in international peer-reviewed publications. *JAMA* 2006;**296**:932-4.
11. Graf C, Battisti WP, Bridges D, *et al*. Research Methods & Reporting. Good publication practice for communicating company sponsored medical research: the GPP2 guidelines. *BMJ* 2009;**339**:b4330.

- 1  
2  
3  
4  
5  
6  
7  
8  
9  
10  
11  
12  
13  
14  
15  
16  
17  
18  
19  
20  
21  
22  
23  
24  
25  
26  
27  
28  
29  
30  
31  
32  
33  
34  
35  
36  
37  
38  
39  
40  
41  
42  
43  
44  
45  
46  
47  
48  
49  
50  
51  
52  
53  
54  
55  
56  
57  
58  
59  
60
12. International Committee of Medical Journal Editors. Recommendations for the conduct, reporting, editing and publication of scholarly work in medical journals. Roles and responsibilities of authors, contributors, reviewers, editors, publishers, and owners: defining the role of authors and contributors. 2013. [http://www.icmje.org/roles\\_a.html](http://www.icmje.org/roles_a.html) (accessed 30 December 2013).
13. Nastasee S. Acknowledgement of medical writers in medical journal articles: a comparison from the years 2000 and 2007. *AMWA J* 2010;**25**:2-6.
14. World Association of Medical Editors. Policy Statement: Ghost writing initiated by commercial companies, Revised 15 June 2005. <http://www.wame.org/resources/policies#ghost> (accessed 30 December 2013).
15. Editors. Ghost writers in the sky. *J Urol* 2008;**179**:809-10.
16. Woolley KL. Goodbye Ghostwriters!: How to work ethically and efficiently with professional medical writers. *Chest* 2006;**130**:921-3.
17. Jacobs A, Wager E. European Medical Writers Association (EMWA) guidelines on the role of medical writers in developing peer-reviewed publications. *Curr Med Res Opin* 2005;**21**:317-22.
18. Hamilton C. AMWA position statement on the contributions of medical writers to scientific publications. *AMWA J* 2003;**18**:13-6.
19. Bennett C, Khangura S, Brehaut J, *et al*. Reporting guidelines for survey research: an analysis of published guidance and reporting practices. *PLoS Med* 2011;**8**:e1001069.
20. Wislar JS, Flanagin A, Fontanarosa PB, *et al*. Honorary and ghost authorship in high impact biomedical journals: a cross sectional survey. *BMJ* 2011;**343**:d6128.
21. Vinther S, Rosenberg J. Appearance of ghost and gift authors in Ugeskrift for Laeger and Danish Medical Journal. *Dan Med J* 2012;**59**:1-6.
22. Price J, Dake J, Oden L. Authorship of health education articles: Guests, ghosts and trends. *Am J Health Behavior* 2000;**24**:290-9.
23. Mowatt G, Shirran L, Grimshaw JM, *et al*. Prevalence of honorary and ghost authorship in Cochrane reviews. *JAMA* 2002;**287**:2769-71.

- 1  
2  
3  
4  
5  
6  
7  
8  
9  
10  
11  
12  
13  
14  
15  
16  
17  
18  
19  
20  
21  
22  
23  
24  
25  
26  
27  
28  
29  
30  
31  
32  
33  
34  
35  
36  
37  
38  
39  
40  
41  
42  
43  
44  
45  
46  
47  
48  
49  
50  
51  
52  
53  
54  
55  
56  
57  
58  
59  
60
24. Mirzazadeh A, Navadeh S, Rokni M, *et al*. The prevalence of honorary and ghost authorships in Iranian bio-medical journals and its associated factors. *Iran J Public Health* 2011;**40**:15-21.
25. Jacobs A, Hamilton C. Decreased evidence of ghostwriting in a 2008 vs 2005 survey of medical writers. *Write Stuff* 2009;**18**:118-23.
26. Ghajarzadeh M. Guest authors in an Iranian journal. *Dev World Bioeth*. Published Online First: 1 Oct 2012. doi: 10.1111/dewb.12002.
27. Flanagin A, Carey LA, Fontanarosa PB, *et al*. Prevalence of articles with honorary authors and ghost authors in peer- reviewed medical journals. *JAMA* 1998;**280**:222-4.
28. Dotson B, Slaughter RL. Prevalence of articles with honorary and ghost authors in three pharmacy journals. *Am J Health Syst Pharm* 2011;**68**:1730-4.
29. Suda KJ, Hurley AM, McKibbin T, *et al*. Publication of noninferiority clinical trials: Changes over a 20-year interval. *Pharmacotherapy* 2011;**31**:833-9.
30. Gøtzsche PC, Hróbjartsson A, Johansen HK, *et al*. Ghost authorship in industry-initiated randomised trials. *PLoS Med* 2007;**4**:0047-52.
31. Rees T, Kelly M, Smith S. How much do healthcare professionals know about GPP authorship criteria? *Curr Med Res Opin* 2013;**29**:S18-S9.
32. Hao X, Qian S, You S, *et al*. Ghost writers and honorary authorship: a survey from the Chinese Medical Journal [abstract]. *Sixth International Congress on Peer Review and Biomedical Publication; 2009 Sept 10-12; Vancouver, BC, Canada* 2009.
33. Hamilton CW, Jacobs A. Evidence of decreased ghostwriting in a series of three surveys of medical communicators conducted between 2005 and 2011. *AMWA J* 2012;**27**:115.
34. Williams M. An inquiry by the UK House of Commons Health Select Committee into the influence of the pharmaceutical industry (18 October). 2004.  
[http://www.meactionuk.org.uk/HoC\\_Select\\_Ctte\\_Inquiry\\_into\\_Pharma.htm](http://www.meactionuk.org.uk/HoC_Select_Ctte_Inquiry_into_Pharma.htm) (accessed 30 December 2013).
35. Elliott C. Pharma goes to the laundry: Public relations and the business of medical education. *Hastings Cent Rep* 2004;**34**:18-23.

- 1  
2  
3  
4  
5  
6  
7  
8  
9  
10  
11  
12  
13  
14  
15  
16  
17  
18  
19  
20  
21  
22  
23  
24  
25  
26  
27  
28  
29  
30  
31  
32  
33  
34  
35  
36  
37  
38  
39  
40  
41  
42  
43  
44  
45  
46  
47  
48  
49  
50  
51  
52  
53  
54  
55  
56  
57  
58  
59  
60
36. Moffatt B, Elliott C. Ghost marketing: Pharmaceutical companies and ghostwritten journal articles. *Perspect Biol Med* 2007;**50**:18-31.
37. Marušić A, Bošnjak L, Jeronšić A. A systematic review of research on the meaning, ethics and practices of authorship across scholarly disciplines. *PLoS One* 2011;**6**:e23477.
38. Bailey M. Science editing and its effect on manuscript acceptance time. *AMWA J* 2011;**26**:147-52.
39. Jacobs A. Adherence to the CONSORT guideline in papers written by professional medical writers. *Write Stuff* 2010;**19**:196-200.
40. Woolley KL, Lew RA, Stretton S, *et al*. Lack of involvement of medical writers and the pharmaceutical industry in publications retracted for misconduct: a systematic, controlled, retrospective study. *Curr Med Res Opin* 2011;**27**:1175-82.
41. PLoS Med. Article metrics: Ghost authorship in industry-initiated randomised trials: PLoS Med, 2013.
42. Bavdekar SB. Authorship issues. *Lung India* 2012;**29**:76-80.
43. Bosch X. Exorcising ghostwriting. Ghostwriting could potentially have serious repercussions for science and should therefore be treated as research misconduct. *EMBO Rep* 2011;**12**:489-94.
44. Matías-Guiu J, García-Ramos R. Ghost-authors, improvement article communication, and medical publications. *Neurologia* 2011;**26**:257-61.
45. Tharyan P. Evidence-based medicine: can the evidence be trusted? *Indian J Med Ethics* 2011;**8**:201-7.
46. Wager E, Field EA, Grossman L. Good publication practice for pharmaceutical companies. *Curr Med Res Opin* 2003;**19**:149-54.
47. Scheife RT. A ghost in the machine. *Pharmacotherapy* 2009;**29**:363-4.
48. MacLennan A, Sturdee D, Fenton A, *et al*. Editorial: Ghost writers, vested interest and funding disclosures. *Climacteric* 2010;**13**:301-2.
49. Nahai F. Ghostwriting: Stringent disclosure policies take aim at authorship abuses. *Aesthet Surg J* 2010;**30**:265-6.

- 1  
2  
3  
4  
5  
6  
7  
8  
9  
10  
11  
12  
13  
14  
15  
16  
17  
18  
19  
20  
21  
22  
23  
24  
25  
26  
27  
28  
29  
30  
31  
32  
33  
34  
35  
36  
37  
38  
39  
40  
41  
42  
43  
44  
45  
46  
47  
48  
49  
50  
51  
52  
53  
54  
55  
56  
57  
58  
59  
60
50. Ngai S, Gold JL, Gill SS, *et al*. Haunted manuscripts: ghost authorship in the medical literature. *Account Res* 2005;**12**:103-14.
51. Wiwanitkit V. Ghostwriting: An existing problem. *Am J Med* 2012;**125**:e17.
52. Krinsky S. When conflict-of-interest is a factor in scientific misconduct. *Med Law* 2007;**26**:447-63.
53. Langdon-Neuner E. Medical ghost-writing. *Mens Sana Monogr* 2008;**6**:257-73.
54. Paul M. On transparency, responsibility, and accountability. *Clin Microbiol Infect* 2009;**15**:1100-2.
55. Górski A, Letkiewicz S. "Medical writing" and ghostwriting as ethical challenges in medical communication. *Transplant Proc* 2010;**42**:3335-7.
56. McHenry L. Of sophists and spin-doctors: industry-sponsored ghostwriting and the crisis of academic medicine. *Mens Sana Monogr* 2010;**8**:129-45.
57. Healy DT. Transparency and trust: figure for ghost written articles was misquoted. *BMJ* 2004;**329**:1345.
58. Mitrany D. The ghostwriting controversy: Time for a proper burial. *Science Editor* 2005;**28**:187.
59. Kmietowicz Z. Consumer organisations criticise influence of drug companies. *BMJ* 2004;**329**:937.
60. Bonita RE, Adams S, Whellan DJ. Reporting of clinical trials: publication, authorship, and trial registration. *Heart Fail Clin* 2011;**7**:561-7.
61. Anon. Ghostwriting in medical literature. *Int J Occup Environ Health* 2011;**17**:168-77.
62. Anon. High prevalence of ghost authorship in industry-initiated trials. *Nat Clin Pract Nephrol* 2007;**3**:240.
63. Baethge C. On ghost authorship and reviews: The 6th International Congress on Peer Review and Biomedical Publication. *Deutsches Arzteblatt* 2009;**106**:731-2.
64. Flanagan A. Research on authorship. What do we know about the prevalence of ghost authorship? *Council of Science Editors Annual Meeting, May 14-18, Atlanta, Georgia* 2010.

- 1  
2  
3  
4  
5  
6  
7  
8  
9  
10  
11  
12  
13  
14  
15  
16  
17  
18  
19  
20  
21  
22  
23  
24  
25  
26  
27  
28  
29  
30  
31  
32  
33  
34  
35  
36  
37  
38  
39  
40  
41  
42  
43  
44  
45  
46  
47  
48  
49  
50  
51  
52  
53  
54  
55  
56  
57  
58  
59  
60
65. Murray S, Brophy J, Palepu A. Open Medicine's ghost and guest authorship policy. *Open Med* 2010;**4**:e11-2.
66. Moore N. Transparency and trust: Clear definition of ghost writing would be helpful. *BMJ* 2004;**329**:1345-6.
67. Hargreaves S. Industry funded trials often have ghost authorship. *BMJ* 2007;**334**:223.
68. Jones N. Ghosts still present in the medical machine. *Nature* 2009;**461**:325.

For peer review only

## FIGURE LEGENDS

**Figure 1. Selection of publications reporting a numerical estimate of the prevalence of ghostwriting.** Electronic databases were searched on 23 May 2013.

<sup>a</sup> Journal of the European Medical Writers Association, formerly known as The Write Stuff.

<sup>b</sup> Journal of the American Medical Writers Association.

<sup>c</sup> Council of Science Editors Annual Meetings.

<sup>d</sup> International Congress on Peer Review and Biomedical Publication.

**Figure 2. Case study of original versus cited evidence of ghostwriting prevalence.**

Contrast between original evidence on the prevalence of possible ghostwriting in sertraline publications from 1998 to 2000 and the subsequent citations of this evidence. Source of the original published evidence: Healy and Cattell[4] showed that 55 of 96 (57%) articles published on sertraline from 1998 to 2000 were coordinated through a medical communications company and concluded that these data provided information on the “possible extent of ghostwriting based on a single drug”. Inaccurate reporting from the cited source is marked with a cross.

**TITLE**

Systematic review on the primary and secondary reporting of the prevalence of ghostwriting  
in the medical literature

**AUTHOR**

Serina Stretton, PhD CMPP

**AUTHOR'S AFFILIATION**

ProScribe – ~~Envision Pharma Group~~ Medical Communications, ~~Neesaville,~~  
~~Queensland~~ Sydney, NSW, Australia

**AUTHOR FOR CORRESPONDENCE**

Serina Stretton, PhD, CMPP

ProScribe – ~~Envision Pharma Group~~ ~~Medical Communications~~

18 Poulet St

Matraville, NSW, 2036

AUSTRALIA

Tel: + 612 9661 0768

Fax: + 612-7-5474 91569661-0766

Email: [serina.stretton@EnvisionPharmaGroup.com](mailto:serina.stretton@EnvisionPharmaGroup.com) ~~ss@proscribe.com.au~~

**KEYWORDS**

Authorship, ghostwriting, systematic review

**WORD COUNT**

3,588441



## ABSTRACT

**Background:** Ghostwriting of industry-sponsored articles is unethical and is perceived to be common practice ~~in the medical literature.~~

**Objective:** ~~To~~ ~~he~~ ~~conduct~~ ~~a~~ systematic~~ally~~ review ~~on~~ how evidence for the prevalence of ghostwriting is reported in the medical literature.

**Data sources:** MEDLINE via PubMed 1966+, EMBASE 1966+, The Cochrane Library 1988+, Medical Writing 1998+, The AMWA Journal 1986+, Council of Science Editors Annual Meetings 2007+, and the Peer Review Congress 1994+ were searched electronically (23 May 2013) using the search terms ghostwrit\*, ghostauthor\*, ghost AND writ\*, ghost AND author\*.

**Eligibility criteria:** All publication types were considered; only publications reporting a numerical estimate of possible ghostwriting prevalence were included.

**Data extraction:** Two independent reviewers screened the publications; discrepancies were resolved by consensus. Data to be collected included a numerical estimate of the prevalence of possible ghostwriting (primary outcome measure), definitions of ghostwriting reported, source of the reported prevalence, publication type and year, study design, and sample population.

**Results** Of the 848 publications retrieved and screened for eligibility, 48 reported numerical estimates for the prevalence of possible ghostwriting ~~and were analyzed further.~~ Sixteen primary publications reported findings from cross-sectional surveys or descriptive analyses of published articles; ~~and~~ 32 secondary publications cited published or unpublished evidence. Estimates on the prevalence of possible ghostwriting in primary and secondary publications varied markedly. Primary estimates were not suitable for meta-analysis because of the various. ~~Estimates were influenced by the~~ definitions of ghostwriting used, ~~the study designs, and types~~ of populations or samples ~~assessed.~~ Secondary estimates were not

1  
2  
3 always reported or, ~~and whether evidence from primary publications was~~ cited correctly or  
4 appropriately.  
5

6  
7 **Conclusions** Evidence for the prevalence of ghostwriting ~~Estimates of ghostwriting~~  
8 ~~report ed~~ in the medical literature is limited and can be outdated, misleading, or mistaken.  
9

10  
11 Researchers should not inflate estimates using nonstandard definitions of ghostwriting nor  
12 conflate ghostwriting with other unethical authorship practices. Editors and peer reviewers  
13 should not accept articles that incorrectly cite or interpret primary publications that report the  
14 prevalence of ghostwriting.  
15  
16  
17  
18  
19  
20  
21  
22  
23  
24  
25  
26  
27  
28  
29  
30  
31  
32  
33  
34  
35  
36  
37  
38  
39  
40  
41  
42  
43  
44  
45  
46  
47  
48  
49  
50  
51  
52  
53  
54  
55  
56  
57  
58  
59  
60

### Strengths

- First systematic review on the reporting of the prevalence of ghostwriting in the medical literature
- A broad search strategy was employed with few restrictions to minimize any potential for publication or language bias; there were no restrictions on language.
- All study designs and publication types were considered

### Limitations

- Study heterogeneity in the outcomes reported and populations investigated precluded synthesis of the data
- Retrospective and self-reported nature of the data collection increased the risk of selection bias in the studies
- Most included studies were not broadly representative of the peer-reviewed medical literature

## INTRODUCTION

Ghostwriting of peer-reviewed journal publications in the medical literature is believed to be common practice.[1-3] This belief is supported, to a large extent, by highly publicized cases, primarily from the 1990s and early 2000s, of pharmaceutical companies and authors who had used ghostwriters to prepare manuscripts for publication in medical journals.[4-6] Such cases are highly unethical because the role of the commercial sponsor and any other potential conflicts of interest were hidden.

Ghostwriting occurs when writing contributions to a manuscript that do not meet authorship criteria are not disclosed in the acknowledgments. This practice is distinct from ghost authoring, where contributions to a manuscript that do merit authorship are not disclosed in the author byline.[7] However, part of the challenge in understanding the prevalence of ghostwriting is the current confusion surrounding the two unethical practices. For example, the widely used Council of Science Editors definition of ghost authors (ie, individuals who participate in research, data analysis, and/or writing of a manuscript but are not named or disclosed in the author byline or acknowledgments) does not distinguish between ghost authors and ghostwriters.[8] Estimating the prevalence of ghostwriting has also been hindered by the failure of authors to distinguish ghostwriting, which is unethical, from professional medical writing support, which is ethical.[9, 10] Ghostwriters keep their involvement in a manuscript hidden, whereas professional medical writers disclose their involvement and follow ethical publication practices.[7, 9-11] Consistent with the authorship criteria recommended by the International Committee of Medical Journal Editors (ICMJE), professional medical writers who provide writing assistance and do not meet all of the ICMJE authorship criteria, should be acknowledged rather than listed as authors.[12] The prevalence of disclosed professional medical writing assistance in medical journals has been estimated to be between 6.0% and 11.0%[10, 13] and the legitimate value that this medical

1  
2  
3 writing assistance can bring to improving the quality, timeliness, and integrity of reporting in  
4  
5 medical journals has been demonstrated.[7, 14, 15] However, the exact prevalence of  
6  
7 ghostwriting and other forms of undisclosed contributions to papers published in medical  
8  
9 journals is unknown.

10  
11  
12  
13 The primary objective of this study was to conduct the first systematic review on how the  
14  
15 prevalence of ghostwriting is reported in the medical literature. The secondary objectives  
16  
17 were to assess the variability of the reported estimates of the prevalence of ghostwriting and  
18  
19 investigate the source for these estimates.  
20  
21  
22  
23  
24  
25  
26  
27  
28  
29  
30  
31  
32  
33  
34  
35  
36  
37  
38  
39  
40  
41  
42  
43  
44  
45  
46  
47  
48  
49  
50  
51  
52  
53  
54  
55  
56  
57  
58  
59  
60

## MATERIALS AND METHODS

### Literature search strategy

A search strategy was developed to retrieve publications from the medical literature that reported quantitative estimates of the prevalence of ghostwriting. The following databases were searched on 23 May 2013: MEDLINE via PubMed (1966+); EMBASE (1966+); The Cochrane Library, including the Cochrane Database of Systematic Reviews and Cochrane Central Register of Controlled Trials (1988+); The AMWA Journal (1986+, journal of the American Medical Writers Association); Medical Writing (1998+, journal of the European Medical Writers Association, formerly known as The Write Stuff); Council of Science Editors annual meetings (2007+); and the International Congress on Peer Review and Biomedical Publication meetings (1994+). General text was searched using the following search terms: ghostwrit\*, ghostauthor\*, ghost AND writ\*, ghost AND author\*. Truncation symbols and Boolean operators (AND, OR) were used wherever possible.

Two reviewers (SS, SMG) independently screened the title and abstracts of all retrieved publications using prespecified eligibility criteria; the full text of potentially eligible publications was screened to confirm eligibility for inclusion. Any discrepancies between the reviewers were resolved by consensus. The reference lists of relevant reviews and other publications were screened by hand to identify any additional publications for inclusion.

### Eligibility criteria

The eligibility criteria were prespecified. Publications were included if they reported a numerical estimate of the prevalence of possible ghostwriting. Publications were excluded if they were duplicate publications from different databases or abstracts of subsequently published full-text articles, did not report any outcomes related to ghostwriting, or reported

1  
2  
3 qualitative estimate(s) of the prevalence of possible ghostwriting. No restrictions on  
4  
5 language were included in the eligibility criteria.  
6  
7

## 8 9 **Data extraction and analysis**

10  
11 The primary and secondary outcomes and data to be collected were prespecified. Data to  
12 be collected and included publication type and year, study design and sample population,  
13  
14 definitions of ghostwriting reported, reported prevalence of possible ghostwriting, and the  
15  
16 source of the reported prevalence of ghostwriting. The prevalence of possible ghostwriting  
17 was reported as published. No unpublished data from the retrieved literature were reported  
18 and values for prevalence were not extrapolated from published data.  
19  
20  
21  
22  
23

24  
25 The primary outcome measure for the systematic review was a numerical estimate of the  
26  
27 prevalence of possible ghostwriting. The reported definitions of possible ghostwriting were  
28  
29 categorized according to the following standard definitions, irrespective of the term used to  
30  
31 describe the practice in the publication. Undisclosed writing contributions to a manuscript  
32  
33 were defined as (i) ghostwriting if they were described as not meriting authorship and were  
34  
35 not listed in the acknowledgments[9, 16] and (ii) ghost authoring if they did merit authorship  
36  
37 and were not listed in the author byline.[7] Consistent with recommendations from  
38  
39 international medical journal editors,[12, 14] Good Publication Practice guidelines,[11] and  
40  
41 professional medical writing associations,[17, 18] disclosed writing contributions to a  
42  
43 manuscript that did not merit authorship and were disclosed in the acknowledgments were  
44  
45 not categorized as ghostwriting.  
46  
47  
48

49  
50 The key factors considered when assessing study quality were study design, the population  
51 assessed, and how ghostwriting was defined. While there is no consensus on the best  
52 practice for reporting survey research,[19] the quality of the cross-sectional surveys was  
53  
54  
55  
56  
57  
58  
59  
60

1  
2  
3 determined by an assessment of the following factors: validation or pretesting of the survey  
4  
5 questions, anonymity of the response, sample size, and response rate.  
6  
7  
8  
9  
10  
11  
12  
13  
14  
15  
16  
17  
18  
19  
20  
21  
22  
23  
24  
25  
26  
27  
28  
29  
30  
31  
32  
33  
34  
35  
36  
37  
38  
39  
40  
41  
42  
43  
44  
45  
46  
47  
48  
49  
50  
51  
52  
53  
54  
55  
56  
57  
58  
59  
60

For peer review only



## RESULTS

### Publication selection

A total of 848 articles were retrieved from the literature search, 800 were excluded, and 48 met the eligibility criteria and were included in the systematic review (Figure 1). The main reasons for exclusion were publications not relevant to ghostwriting (n = 539), duplicate publications from different databases (n = 129), and publications not reporting a numerical estimate of the prevalence of possible ghostwriting (n = 124). The titles or abstracts of the 8 publications that were excluded because the full text or abstract could not be retrieved were reviewed; none were considered to report a numerical estimate of the prevalence of possible ghostwriting. Overall, eligible publications included 16 primary publications that reported original research on the prevalence of possible ghostwriting and 32 secondary publications that cited published or unpublished evidence of possible ghostwriting.

### Primary publications

#### Publication characteristics

Of the 16 primary publications (Table 1), there were 13 full-text publications[4, 6, 20-30] and three conference abstracts[31-33] that reported a numerical estimate of possible ghostwriting. Twelve publications[20-28, 31-33] reported findings from cross-sectional surveys and four publications[4, 6, 29, 30] reported findings from descriptive analyses of published articles. **While there is no consensus on the best practice for reporting survey research,[33]M** most cross-sectional surveys were reasonably well reported. The surveys used were not validated but most included pretested questions, required an anonymous response, were conducted in targeted populations (ie, all individuals invited to participate were involved in the preparation of peer-reviewed manuscripts), and reported a sample size and response rate. Of the cross-sectional surveys conducted in targeted populations (eg,

1  
2  
3 corresponding or first authors), six had response rates greater than 50%, two had response  
4  
5 rates less than 50%, and one did not report a response rate (Table 1). Of the cross-sectional  
6  
7  
8  
9  
10  
11  
12  
13  
14  
15  
16  
17  
18  
19  
20  
21  
22  
23  
24  
25  
26  
27  
28  
29  
30  
31  
32  
33  
34  
35  
36  
37  
38  
39  
40  
41  
42  
43  
44  
45  
46  
47  
48  
49  
50  
51  
52  
53  
54  
55  
56  
57  
58  
59  
60

For peer review only

**Table 1.** Characteristics of Primary Publications Reporting Original Evidence of Ghostwriting

| Publication                                                                     | Population                               | Survey description                                           | Data collected    | N        | RR               |
|---------------------------------------------------------------------------------|------------------------------------------|--------------------------------------------------------------|-------------------|----------|------------------|
| <b><i>Cross-sectional surveys – authors or corresponding authors</i></b>        |                                          |                                                              |                   |          |                  |
| Flanagin 1998[27]                                                               | 6 general medicine journals <sup>a</sup> | Self-administered, postal, anonymous, pretested, targeted    | 1996              | 809      | 69%              |
| Mowatt 2002[23]                                                                 | Published Cochrane reviews               | Self-administered, online, anonymous, pretested, targeted    | 1999              | 362      | 63%              |
| Hao 2009[32] (Abstract)                                                         | Chin Med J                               | Self-administered, email, not anonymous, targeted            | 2008 <sup>c</sup> | 220      | 86%              |
| Dotson 2011[28]                                                                 | 3 pharmacy journals                      | Self-administered, online, anonymous, pretested, targeted    | 2009              | 112      | 25%              |
| Mirzazadeh 2011[24]                                                             | 3 Iranian journals                       | Self-administered, email, not anonymous, targeted            | 2009-2010         | NR       | NR               |
| Wislar 2011[20]                                                                 | 6 general medicine journals <sup>b</sup> | Self-administered, online, anonymous, pretested, targeted    | 2008              | 622      | 70%              |
| Ghajarzadeh 2012[26]                                                            | Arch Iran Med (based on student theses)  | Self-administered, email, anonymous, targeted                | 2005-2007         | 30       | 49%              |
| Vinther 2012[21]                                                                | Ugeskr Laeger & Dan Med J                | Self-administered, online, anonymous, pretested, targeted    | 2010              | 272      | 62%              |
| <b><i>Cross-sectional surveys – healthcare professionals</i></b>                |                                          |                                                              |                   |          |                  |
| Price 2000[22]                                                                  | Health academic staff                    | Self-administered, postal, anonymous, pretested, targeted    | NR                | 166      | 59%              |
| Rees 2013[31] (Abstract)                                                        | Registered users of EPG Online           | Self-administered, online, anonymous, nontargeted            | NR                | 295      | NR               |
| <b><i>Cross-sectional surveys – members of medical writing associations</i></b> |                                          |                                                              |                   |          |                  |
| Jacobs 2009[25]                                                                 | EMWA / AMWA members                      | Self-administered, online, anonymous, pretested, nontargeted | 2005, 2008        | 843, 773 | 28%, 14%         |
| Hamilton                                                                        | EMWA / AMWA                              | Self-administered, online,                                   | 2011              | 620      | 12% <sup>d</sup> |

2012[33] members anonymous, pretested,  
(Abstract) nontargeted

---

**Publication reviews and descriptive analysis**

|                      |                                                                       |    |               |     |    |
|----------------------|-----------------------------------------------------------------------|----|---------------|-----|----|
| Healy 2003[4]        | Articles on sertraline                                                | NA | 1998-<br>2000 | 96  | NA |
| Götzsche<br>2007[30] | Articles on Danish<br>industry-initiated trials<br>approved 1994-1995 | NA | NR            | 44  | NA |
| Ross 2008[6]         | Reviews on rofecoxib<br>associated with Merck<br>support              | NA | 1996-<br>2004 | 72  | NA |
| Suda 2011[29]        | Noninferiority clinical<br>trials                                     | NA | 1989-<br>2009 | 583 | NA |

<sup>a</sup> Annals of Internal Medicine, JAMA, the New England Journal of Medicine, American Journal of Cardiology, American Journal of Medicine, American Journal of Obstetrics and Gynecology.

<sup>b</sup> Annals of Internal Medicine, JAMA, the New England Journal of Medicine, Lancet, Nature Medicine, PLoS Medicine.

<sup>c</sup> Submission date.

<sup>d</sup> Personal communication, C. Hamilton.

Abbreviations: AMWA, American Medical Writers Association; EMWA, European Medical Writers Association; NA, not applicable; NR, not reported; RR, response rate.

surveys conducted in nontargeted populations (eg, individuals invited to participate who may or may not have been involved in providing medical writing assistance for peer-reviewed publications), three had low (12% to 28%) response rates and one did not report a response rate (Table 1).

Not all cross-sectional surveys were broadly representative of the peer-reviewed medical literature. The cross-sectional surveys were conducted in single populations of academic staff or healthcare professionals[22, 31], members of medical writing associations[25, 33], or

1  
2  
3 corresponding or first authors. The corresponding or first authors were surveyed from single  
4 journals (Cochrane reviews, Chinese Medical Journal, Archives of Iranian Medicine),[23, 26,  
5 32] two Danish journals,[21] three Iranian journals,[24] and three pharmacy journals.[28] Two  
6  
7 cross-sectional surveys of corresponding authors were conducted in six general medicine  
8  
9 journals.[20, 27]  
10  
11

12  
13  
14  
15 The descriptive analyses of published articles were conducted in single populations and  
16 included an analysis of sertraline publications from 1998 to 2000,[4] rofecoxib reviews from  
17 1996 to 2004,[6] publications from industry-initiated trials in Denmark from 1994 to 1995,[30]  
18 and from published noninferiority trials from 1989 to 2009.[29]  
19  
20  
21  
22

#### 23 24 25 Reported prevalence of ghostwriting

26  
27 The reported prevalence of possible ghostwriting in the primary publications varied markedly  
28  
29 and were not suitable for meta-analysis and was difficult to compare because of the different  
30 populations assessed, the different methods used to generate the estimates, and the various  
31 definitions that were used (Tables 1 and 2). All cross-sectional surveys reported a definition  
32 of ghostwriting or ghost authoring, but most definitions did not differentiate contributions that  
33 merited authorship from those that did not merit authorship (Table 2).  
34  
35  
36  
37  
38  
39

40  
41 Four cross-sectional surveys reported the prevalence of ghostwriting where the definition  
42 provided could be categorized as undisclosed contributions that do not merit authorship.[20,  
43 25, 27, 33] Findings from these surveys, which were repeated at different time points,  
44 suggested that the prevalence of ghostwriting is low and decreasing. Flanagin[27] and  
45 Wislar[20] conducted two similar cross-sectional surveys of corresponding authors of articles  
46 published in six general medicine journals in 1996[27] and in 2008.[20] The surveys, which  
47 included a core set of three journals (Annals of Internal Medicine, JAMA, the New England  
48 Journal of Medicine) at each time point and in targeted populations, used pretested  
49  
50  
51  
52  
53  
54  
55  
56  
57  
58  
59  
60

**Table 2.** Primary Publications Reporting Estimates of the Prevalence of Possible Ghostwriting

| Publication                                                                               | <u>Measure of Possible Ghostwriting Reported</u><br><u>Authors</u>                                                                                                               | <u>Estimate % (n)</u>                                                                                      |
|-------------------------------------------------------------------------------------------|----------------------------------------------------------------------------------------------------------------------------------------------------------------------------------|------------------------------------------------------------------------------------------------------------|
| <b><i>Cross-sectional surveys reporting ghostwriting</i></b>                              |                                                                                                                                                                                  |                                                                                                            |
| Flanagin 1998[27]                                                                         | Unnamed individual who participated in the writing                                                                                                                               | 1.4% (11/809) of articles                                                                                  |
| Wislar 2011[20]                                                                           | Unnamed individual who participated in the writing                                                                                                                               | 0.2% <sup>a</sup> (1/622) of articles                                                                      |
| Jacobs 2009,<br>Hamilton 2012[25,<br>33]                                                  | Undisclosed medical writing assistance not qualifying for authorship                                                                                                             | 2005: 61.8% (NR)<br>2009: 41.7% (NR)<br>2011: 33.0% (NR)<br>of <u>writers</u> <u>articles</u> <sup>b</sup> |
| <b><i>Cross-sectional surveys reporting combined ghost authoring and ghostwriting</i></b> |                                                                                                                                                                                  |                                                                                                            |
| Flanagin 1998[27]                                                                         | Failure to name, as an author, individuals who made substantial contributions to the research or writing or an unidentified medical writer                                       | 11.5% (93/809) of articles                                                                                 |
| Price 2000[22]                                                                            | Failure to name, as an author, individuals who made substantial contributions to the research or writing                                                                         | 24.1% (40/166) of authors                                                                                  |
| Mowatt 2002[23]                                                                           | Individual merited authorship or had assisted with drafting but not listed as an author or acknowledged                                                                          | 8.8% (32/362) of articles                                                                                  |
| Hao 2009[32]                                                                              | English-language speakers assisted with writing but not identified as authors or acknowledged                                                                                    | 10.4% (NR) of authors                                                                                      |
| Dotson 2011[28]                                                                           | Failure to name, as an author, individuals who made substantial contributions to the research or writing                                                                         | 0.9% (1/112) of articles                                                                                   |
| Wislar 2011[20]                                                                           | Failure to name, as an author, individuals who made substantial contributions to the research or writing of the article or an unnamed individual who participated in the writing | 7.9% (49/622) of articles                                                                                  |
| <b><i>Cross-sectional surveys reporting ghost authoring</i></b>                           |                                                                                                                                                                                  |                                                                                                            |
| Mirzazadeh<br>2011[24]                                                                    | Failure to name, as an author, individuals who made substantial contributions to the research                                                                                    | 21.4% (25/NR) of authors                                                                                   |

|    |                  |                                                              |                   |
|----|------------------|--------------------------------------------------------------|-------------------|
| 1  |                  |                                                              |                   |
| 2  |                  |                                                              |                   |
| 3  | Ghajarzadeh      | Failure to name, as an author, students who made substantial | 0.7% (2/296) of   |
| 4  |                  |                                                              |                   |
| 5  | 2012[26]         | contributions to the research <sup>c</sup>                   | articles          |
| 6  |                  |                                                              |                   |
| 7  | Vinther 2012[21] | Individual merited authorship but not listed as an author    | 2.4% (6/245) of   |
| 8  |                  |                                                              | articles          |
| 9  |                  |                                                              |                   |
| 10 | Rees 2013[31]    | Individual merited authorship but not listed as an author    | 70% (NR/202) of   |
| 11 |                  |                                                              | published authors |
| 12 |                  |                                                              |                   |
| 13 |                  |                                                              |                   |

---

***Publication reviews and descriptive analysis reporting possible ghost authoring or ghostwriting***

|    |               |                                                                        |                  |
|----|---------------|------------------------------------------------------------------------|------------------|
| 14 |               |                                                                        |                  |
| 15 |               |                                                                        |                  |
| 16 | Healy 2003[4] | Published articles coordinated by a medical information                | 57.3% (55/96) of |
| 17 |               | company, including acknowledged medical writing support <sup>d,e</sup> | articles         |
| 18 |               |                                                                        |                  |
| 19 | Gøtzsche      | Individuals who wrote the trial protocol, conducted the                | 75.0% (33/44) of |
| 20 |               |                                                                        |                  |
| 21 | 2007[30]      | statistical analyses, or wrote the manuscript but were not listed      | trials           |
| 22 |               |                                                                        |                  |
| 23 |               | as authors, not members of a study group or steering                   |                  |
| 24 |               |                                                                        |                  |
| 25 |               | committee, or not disclosed in an acknowledgment                       |                  |
| 26 |               |                                                                        |                  |
| 27 | Ross 2008[6]  | Published reviews associated with Merck support and with a             | 69.4% (50/72) of |
| 28 |               |                                                                        |                  |
| 29 |               | single external author <sup>e,d</sup>                                  | reviews          |
| 30 |               |                                                                        |                  |

---

<sup>a</sup> Available as online supplementary data.

<sup>b</sup> Values represent the mean weighted percentage of publications that were ghostwritten by respondents. Findings were weighted in proportion to the number of manuscripts the respondent wrote per year.

<sup>b,c</sup> Students were classified as ghostwriters if the student was not named as an author and if the results reported in the publications were based on the results of their theses.

<sup>e,d</sup> Authors conclude data provide quantification of the possible extent of ghostwriting based on a single drug. Of the 55 published articles that were coordinated through a medical information company, 2 included medical writing assistance that was acknowledged in the published article.

<sup>e,e</sup> Published review articles had been identified from correspondence between Merck and a medical publishing company, from Merck publication status reports, or were affiliated with an author named within the correspondence or publication status reports. The authors did not report whether medical writing assistance was acknowledged in the published article.

Abbreviations: NR, not reported.

1  
2  
3 questions that required an anonymous response and had response rates greater than 65%.  
4  
5 The prevalence of ghost authoring (which included ghostwriting) was estimated to be 11.5%  
6  
7 in 1996 and 7.9% in 2008. The prevalence of ghostwriting from these surveys was estimated  
8  
9 to be 1.4% in 1996 and 0.2% in 2008. Hamilton and Jacobs conducted a cross-sectional  
10  
11 survey of members of two medical writing associations in 2005, 2008, and 2011.[25, 33] The  
12  
13 survey, which was not conducted in targeted populations, used pretested questions that  
14  
15 required an anonymous response and had response rates from 12% to 28% of the total  
16  
17 population surveyed (ie, not all participants surveyed were involved in the preparation of  
18  
19 peer-reviewed manuscripts). Findings from these surveys showed that the mean weighted  
20  
21 percentage of publications that were association members who contributed to peer reviewed  
22  
23 publications and had ghostwritten by respondents at least once during the survey year had  
24  
25 decreased from 61.8% in 2005 to 33.0% in 2011. Findings were weighted in proportion to  
26  
27 the number of manuscripts the respondent wrote per year.  
28  
29

30  
31 Six cross-sectional survey publications reported the prevalence of possible ghostwriting (ie,  
32  
33 the prevalence of ghostwriting and ghost authoring combined).[20, 22, 23, 27, 28, 32] The  
34  
35 prevalence of possible ghostwriting reported in these cross-sectional surveys varied from  
36  
37 0.9% to 24.1% of publications or authors.  
38  
39

40  
41 Four cross-sectional survey publications reported the prevalence of ghost authoring.[21, 24,  
42  
43 26, 31] The prevalence of ghost authoring reported in these cross-sectional surveys varied  
44  
45 from 0.7% to 70% of publications or authors.  
46  
47

48  
49 The descriptive analyses of published articles on sertraline and rofecoxib did not include a  
50  
51 prespecified definition of ghost authoring or ghostwriting;[4, 6] in these studies, possible  
52  
53 ghostwriting or ghost authoring was assumed in publications associated with industry-  
54  
55 sponsored support (Table 2). The descriptive analysis of industry-initiated trials in Denmark  
56  
57 used a nonstandard definition of ghost authors; in this study ghost authors were defined as  
58  
59



1  
2  
3 individuals, not named as authors, who were involved in writing the protocol, conducting the  
4 statistical analyses, or writing the manuscript.[30] The prevalence of possible ghostwriting in  
5 the two descriptive analyses of single drugs that did not include a prespecified definition of  
6 ghostwriting was 57% of articles on sertraline published from 1998 to 2000[4] and 69% of  
7 reviews on rofecoxib published from 1996 to 2004.[6] The prevalence of possible  
8 ghostwriting in the descriptive analysis of Danish industry-initiated trials, which used a  
9 nonstandard definition of authorship, was 75% of Danish initiated trials approved in 1994 to  
10 1995.[30] The descriptive analysis of noninferiority trials[29] was not considered further as  
11 the definition of ghostwriting used was consistent with disclosed medical writing assistance.  
12 In this study ghostwriters were defined as acknowledged individuals, other than authors, who  
13 contributed to the writing and were affiliated with an industry-sponsored study.[29] The  
14 prevalence of disclosed medical writing assistance in this descriptive analysis was 17.3%  
15 (101/583) of clinical trials.  
16  
17  
18  
19  
20  
21  
22  
23  
24  
25  
26  
27  
28  
29  
30  
31

## 32 **Secondary publications**

### 33 Publication characteristics

34  
35 Of the 32 secondary publications, there were 13 review articles, 10 editorials, 5  
36 commentaries, 3 news articles, and 1 government report, with most being published after  
37 2008 (Table 3). Most publications cited primary sources as evidence of the prevalence of  
38 possible ghostwriting (Table 3), with the cited prevalence of possible ghostwriting varying  
39 from 6% of publications to 100% of publications involving drugs. In most secondary  
40 publications, the information on the prevalence of ghostwriting was not reported consistently  
41 compared with the cited evidence (Table 3). Misleading and mistaken information was  
42 reported in many publications that (i) did not distinguish between ghostwriting and ghost  
43 authoring, (ii) included acknowledged medical writing assistance or a combined estimate of  
44 guest authorship and ghost authorship as ghostwriting, (iii) generalized findings from  
45 publication reviews and analyses of specific datasets to wider populations of publications or  
46  
47  
48  
49  
50  
51  
52  
53  
54  
55  
56  
57  
58  
59  
60

**Table 3.** Characteristics of Secondary Publications Citing Evidence of Possible Ghostwriting

| <b>Publication</b>                          | <b>Cited evidence</b>  | <b>Consistent with cited source(s)</b> | <b>Comment</b>                                                                       |
|---------------------------------------------|------------------------|----------------------------------------|--------------------------------------------------------------------------------------|
| Elliot Hastings Cent Rep 2004[35]           | Primary                | No                                     | Did not distinguish GW from GA                                                       |
| Moffat Perspect Biol Med 2007[36]           | Primary                | No                                     | Did not distinguish GW from GA                                                       |
| Schiefe Pharmacotherapy 2009[47]            | Primary                | No                                     | Did not distinguish GW from GA                                                       |
| MacLennan Climacteric 2010[48]              | Primary                | No                                     | Did not distinguish GW from GA                                                       |
| Nahai Aesthet Surg J 2010[49]               | Secondary              | No                                     | Did not distinguish GW from GA                                                       |
| Ngai Account Res 2005[50]                   | Primary                | Yes                                    | Did not distinguish GW from GA                                                       |
| Bosch EMBO Rep 2011[43]                     | Primary                | Yes                                    | Did not distinguish GW from GA                                                       |
| Wiwanitkit Am J Med 2012[51]                | Primary                | No                                     | Did not distinguish GW from GA<br>or GA from guest authorship                        |
| Krimsky Med Law 2007[52]                    | Primary                | No                                     | Did not distinguish GW from GA<br>or GA from guest authorship                        |
| Langdon-Neuner Mens Sana Monogr<br>2008[53] | Primary &<br>secondary | No                                     | Did not distinguish GW from GA<br>or GW from disclosed medical<br>writing support    |
| Tharyan Indian J Med Ethics 2011[45]        | Primary                | Yes                                    | Did not distinguish GW from GA<br>or GW from disclosed medical<br>writing assistance |
| Paul Clin Microbiol Infect 2009[54]         | Primary                | Yes                                    | Did not distinguish GW / GA<br>from disclosed medical writing<br>assistance          |
| Bavdekar Lung India 2012[42]                | Primary                | No                                     | Did not distinguish GW from GA<br>and generalized evidence to a<br>wider population  |
| Górski Transplant Proc 2010[55]             | Primary &<br>secondary | No                                     | Did not distinguish GW from GA<br>and generalized evidence to a<br>wider population  |

|    |                                       |             |         |                                 |
|----|---------------------------------------|-------------|---------|---------------------------------|
| 1  |                                       |             |         |                                 |
| 2  |                                       |             |         |                                 |
| 3  | Matias-Guiu Neurologia 2011[44]       | Primary &   | No      | Did not distinguish GW from GA  |
| 4  |                                       | secondary   |         | and generalized evidence to a   |
| 5  |                                       |             |         | wider population                |
| 6  |                                       |             |         |                                 |
| 7  |                                       |             |         |                                 |
| 8  | McHenry Mens Sana Monogr 2010[56]     | Gov. report | No      | Generalized evidence to a wider |
| 9  |                                       |             |         | population                      |
| 10 |                                       |             |         |                                 |
| 11 | Healy BMJ 2004[57]                    | Primary &   | No / ND | Generalized evidence to a wider |
| 12 |                                       | secondary   |         | population and reported         |
| 13 |                                       |             |         | personal opinion of GW          |
| 14 |                                       |             |         | prevalence                      |
| 15 |                                       |             |         |                                 |
| 16 | Abbasi BMJ 2004[2]                    | Secondary   | No      | Secondary publication cited     |
| 17 |                                       |             |         | named individual                |
| 18 |                                       |             |         |                                 |
| 19 | Mitrany Science Editor 2005[58]       | None        | ND      | Cited named individual          |
| 20 |                                       |             |         |                                 |
| 21 | Collier Can Med Assoc J 2009[3]       | None        | ND      | Cited named individual          |
| 22 |                                       |             |         |                                 |
| 23 | Kmietowicz BMJ 2004[59]               | None        | ND      | Cited named individual          |
| 24 |                                       |             |         |                                 |
| 25 | Matthews Wall St J 2005[1]            | None        | ND      | Cited unpublished data          |
| 26 |                                       |             |         |                                 |
| 27 | Bonita Heart Fail Clin 2011[60]       | Primary     | Yes     | Consistent with cited source    |
| 28 |                                       |             |         |                                 |
| 29 | Grassley Int J Occup Environ Health   | Primary     | Yes     | Consistent with cited source    |
| 30 | 2011[61]                              |             |         |                                 |
| 31 |                                       |             |         |                                 |
| 32 | Nat Clin Pract Nephrol 2007[62]       | Primary     | Yes     | Consistent with cited source    |
| 33 |                                       |             |         |                                 |
| 34 | Editors J Urol 2008[15]               | Primary     | Yes     | Consistent with cited source    |
| 35 |                                       |             |         |                                 |
| 36 | Baethge Deutsches Arzteblatt 2009[63] | Primary     | Yes     | Consistent with cited source    |
| 37 |                                       |             |         |                                 |
| 38 | Flanagin CSE Annual Mtg 2010[64]      | Primary     | Yes     | Consistent with cited source    |
| 39 |                                       |             |         |                                 |
| 40 | Murray Open Med 2010[65]              | Primary     | Yes     | Consistent with cited source    |
| 41 |                                       |             |         |                                 |
| 42 | Moore BMJ 2004[66]                    | Secondary   | Yes     | Consistent with cited source    |
| 43 |                                       |             |         |                                 |
| 44 | Hargreaves BMJ 2007[67]               | Primary     | Yes     | Consistent with cited source    |
| 45 |                                       |             |         |                                 |
| 46 | Jones Nature 2009[68]                 | Primary     | Yes     | Consistent with cited source    |
| 47 |                                       |             |         |                                 |
| 48 |                                       |             |         |                                 |
| 49 |                                       |             |         |                                 |
| 50 |                                       |             |         |                                 |

Abbreviations: CSE, Council of Science Editors; GA, ghost authoring; Gov, government; GW, ghostwriting; ND, not determined.

industry-sponsored trials, or (iv) cited personal communications or informal surveys where the original source was unpublished and could not be verified (Table 3).

1  
2  
3  
4  
5 Case study of misleading and mistaken evidence  
6

7 An analysis of secondary publications citing the possible prevalence of ghostwriting in  
8 sertraline publications provides an illuminating case study on how misleading or mistaken  
9 evidence can enter and remain in the medical literature. In 2003, Healy and Cattell showed  
10 that 57% (55/96) of articles on sertraline published from 1998 to 2000 were coordinated  
11 through a medical information company and only two acknowledged medical writing  
12 assistance.[4] The authors concluded that these data provided information on the “possible  
13 extent of ghostwriting based on a single drug”. In 2004 (October 14), Healy also provided  
14 evidence on the influence of the pharmaceutical industry on key groups at a United Kingdom  
15 House of Commons Health Select Committee investigation.[34] In answer to Question 197,  
16 Healy stated the following:  
17  
18  
19  
20  
21  
22  
23  
24  
25  
26  
27  
28

29 *“My estimate is that, even in journals like the BMJ, the Lancet, the New England Journal of*  
30 *Medicine and JAMA, the leading journals in the field, if these articles have to do with*  
31 *therapeutics, with drugs, it may be worse perhaps for psychiatry than elsewhere, but I doubt*  
32 *it, 50% of these articles are ghostwritten. It may be higher.”*  
33  
34  
35  
36  
37  
38

39 Healy and Cattell’s original evidence has been cited incorrectly and interchangeably with  
40 Healy’s statement to the House of Commons Health Select Committee investigation (Figure  
41 2). Although findings from the primary publication have been cited and interpreted correctly  
42 in two secondary publications,[35, 36] many secondary publications incorrectly cited Healy’s  
43 original evidence and statement to the House of Commons Health Select Committee  
44 investigation (Figure 2).  
45  
46  
47  
48  
49  
50  
51  
52  
53  
54  
55  
56  
57  
58  
59  
60

## DISCUSSION

This systematic review on the reported prevalence of ghostwriting in the medical literature showed that the estimates of the prevalence of ghostwriting in primary publications varied markedly and were influenced by the definitions used, the types of study designs, and the type of population or samples assessed. In addition, secondary publications often cited outdated, misleading, or mistaken evidence of the reported prevalence of ghostwriting, with many publications not distinguishing ghostwriting from ghost authoring.

Although evidence from descriptive analyses can highlight the extent of ghostwriting in single populations, evidence from well-conducted cross-sectional surveys have the potential to provide estimates of the prevalence of ghostwriting that may be generalized to the majority of peer-reviewed publications. Despite this, many of the cross-sectional surveys retrieved in this systematic review were conducted in limited populations that were not broadly representative of the peer-reviewed medical literature. In addition, many of the cross-sectional surveys did not differentiate between contributions that merited authorship from those that did not merit authorship and provided at best, an estimate of possible ghostwriting. The reported prevalence of ghostwriting, where ghostwriting was defined as undisclosed contributions that did not merit authorship, was retrieved from the two cross-sectional surveys of corresponding authors from several general medicine journals and by cross-sectional surveys (repeated on three separate occasions from 2005 to 2011) of members of two major medical writing associations. Together the findings from these surveys suggested that the prevalence of ghostwriting has decreased in recent years. However, while the findings from these surveys may be considered more broadly representative of the peer-reviewed medical literature than surveys focused on single journals, single countries, or single subject areas, interpretation of these findings should take

1  
2  
3 into account that respondents were required to retrospectively self-report potentially  
4 unethical or unprofessional behaviour.  
5  
6  
7

8  
9 Unethical authorship practices are a major concern and are an increasingly recognized  
10 problem in the medical literature.[37] As the findings from this systematic review suggest,  
11 some of these perceived problems may arise from the considerable, but unnecessary,  
12 confusion and disagreement surrounding the definitions of ghostwriting. As recognized by  
13 the World Association of Medical Editors, professional medical writers can have a legitimate  
14 role in assisting authors to communicate their research findings in the peer-reviewed  
15 literature.[14] Professional medical writers can and do improve the timeliness and quality of  
16 reporting and can assist investigators and industry sponsors to meet their ethical  
17 commitments to the disclosure and publishing of clinical trial results.[7, 38-40] As such, the  
18 misleading and mistaken reporting of the prevalence of ghostwriting that was evident in the  
19 secondary publications retrieved in this systematic review is disappointing. Specifically, the  
20 confusion surrounding definitions of ghost authorship and ghostwriting and the unbalanced  
21 focus on industry as the source of unethical authorship practices in the secondary  
22 publications takes attention away from the need to focus on all types of unethical  
23 contributions in peer-reviewed publications, irrespective of the source of the unethical  
24 practice.  
25  
26  
27  
28  
29  
30  
31  
32  
33  
34  
35  
36  
37  
38  
39  
40  
41  
42

43 The strengths of this systematic review are that a broad search strategy was employed with  
44 few restrictions to minimize any potential for publication or language bias. All study designs  
45 and publication types were considered and there were no restrictions on language. Although  
46 the full text or abstracts of 8 publications could not be retrieved, omission of these  
47 publications was unlikely to have biased the findings. Review of the abstracts or titles of  
48 these publications suggested that none reported numerical estimates of the prevalence of  
49 ghostwriting. The major finding of this review was the limitations of the reported evidence of  
50 ghostwriting in the medical literature. These limitations included the heterogeneity among the  
51  
52  
53  
54  
55  
56  
57  
58  
59  
60

1  
2  
3 studies in the outcomes reported and populations investigated, the observational study  
4 designs, and the retrospective nature of data collection. Given the nature of unethical  
5 authorship practices, it may not be feasible to conduct a prospective study on ghostwriting.  
6  
7 However, based on the findings from this review, recommendations can be made to help  
8  
9 researchers, authors, editors, and peer-reviewers apply the same rigorous standards that  
10  
11 are applied to the conduct and assessment of all clinical research and actively improve the  
12  
13 quality of reporting of the evidence of unethical authorship practices.  
14  
15  
16

17  
18  
19 Researchers should use a standard definition of ghostwriting so that the confusion around  
20  
21 ghostwriters and ghost authors is not perpetuated. Ghostwriting is paid or unpaid writing  
22  
23 assistance by individuals who generally do not merit authorship and whose contributions are  
24  
25 not disclosed in the acknowledgments.[7] In contrast, ghost authoring is contributions to the  
26  
27 research, data analysis, and/or writing of a manuscript by individuals who do merit  
28  
29 authorship and whose contributions are not disclosed in the author byline.[7] For example,  
30  
31 the descriptive analysis of Danish industry-initiated trials used a nonstandard definition of  
32  
33 authorship, which is likely to have contributed to the very high prevalence of possible  
34  
35 ghostwriting reported in this study (75%). In this study, Gøtzsche et al.[30] suggested that  
36  
37 individuals who write the trial protocol, conduct the statistical analyses, or who contribute to  
38  
39 the writing of a publication should be included as authors. Indeed, the prevalence of ghost  
40  
41 authorship in this study was 91% when the analyses included these individuals, irrespective  
42  
43 of whether they had been appropriately acknowledged elsewhere. Given that the Gøtzsche  
44  
45 et al.[30] study has been downloaded more than 3,000 times since publication[41] and cited  
46  
47 repeatedly as evidence not only of ghost authorship but also of ghostwriting,[42-45] it would  
48  
49 have been illuminating if the authors had included an estimate of the prevalence of  
50  
51 ghostwriting using standard definitions for comparison. In addition to using standard  
52  
53 definitions of ghostwriting, researchers and authors should ensure that cited evidence of  
54  
55 ghostwriting is reported accurately without unwarranted generalizations. Publications based  
56  
57 on personal commentary should be avoided and studies that use nonstandard definitions,  
58  
59

1  
2  
3 specific populations, or that were conducted before a change in practice (eg, before the  
4 adoption of the Good Publication Practice guidelines for communicating company sponsored  
5 research in 2003 [GPP][46] and in 2009 [GPP2][11]) should be described in context.  
6  
7  
8  
9

10  
11 Editors and peer reviewers have a duty to prevent outdated, misleading, or mistaken  
12 evidence on the prevalence of ghostwriting from being published and perpetuated. Close  
13 attention should be paid to the internal and external validity of the study, the definitions used,  
14 how the data are reported, and whether the data are interpreted within the context of current  
15 practices. When assessing a submitted manuscript on ghostwriting, editors should consider  
16 using peer reviewers with expertise in the appropriate study designs (eg, survey research)  
17 and ethical publication practices. Collectively, these actions could help prevent further  
18 questionable evidence on the prevalence of ghostwriting from being published.  
19  
20  
21  
22  
23  
24  
25  
26  
27  
28

29 In conclusion, the findings from this systematic review showed that reports of the prevalence  
30 of ghostwriting in the medical literature are limited by the varied definitions used to describe  
31 unethical authorship practices, the types of study designs employed, and the populations  
32 assessed. To improve reporting, researchers should not inflate estimates using nonstandard  
33 definitions of ghostwriting nor conflate ghostwriting with other unethical authorship practices.  
34 While open and transparent debate should be encouraged, editors and peer reviewers  
35 should not accept articles that incorrectly cite or interpret primary publications that report the  
36 prevalence of ghostwriting.  
37  
38  
39  
40  
41  
42  
43  
44  
45  
46  
47  
48  
49  
50  
51  
52  
53  
54  
55  
56  
57  
58  
59  
60



## ACKNOWLEDGMENTS

The author, SS, contributed to the conception and design of the systematic literature review, the collection and screening of publications, and the analysis and interpretation of the findings. SS drafted and critically revised draft versions of the manuscript and gave final approval for submission.

The author acknowledges and thanks Sericka McGee, PharmD, Hamilton House, for her contributions to the conception and design of the systematic literature review and the collection and screening of articles for inclusion. Sericka McGee contributed to an earlier version of the systematic review (search dates 1966 to May 2011), which was presented at the 8th Annual Meeting, International Society for Medical Publication Professionals, 23-25 Apr 2012 and at the 72<sup>nd</sup> Annual Conference, American Medical Writers Association, 4-6 Oct 2012, Sacramento, USA. The author thanks Professor Karen Woolley, PhD, CMPP (ProScribe – ~~Envision Pharma Group Medical Communications~~) and Dr Cindy Hamilton, PharmD, ELS (Hamilton House) for their stimulating and valuable contributions to the interpretation of the findings from this study and for their critical review during the drafting of the manuscript.

## COMPETING INTERESTS

The author is a professional medical writer who is actively involved in national and international not-for-profit organizations that encourage ethical medical writing practices. The author has no relationships with any pharmaceutical company that might have an interest in the submitted work and has no other relationships that could be construed as a competing interest.

## FUNDING

The author was supported (eg, reimbursement of expenses for conference travel) by her employer, ProScribe ~~Medical Communications~~ Envision Pharma Group, for the submitted work. No other funding was received to conduct this research.

For peer review only

**REFERENCES**

1. Mathews AW. Ghost story: at medical journals, writers paid by industry play big role. *Wall St J (East Ed)* 2005:A1, A8.
2. Abbasi K. Editor's choice: Transparency and trust. *BMJ* 2004;**329**:0.8.
3. Collier R. Prevalence of ghostwriting spurs calls for transparency. *Can Med Assoc J* 2009;**181**:E161-2.
4. Healy D, Cattell D. Interface between authorship, industry and science in the domain of therapeutics. *Br J Psychiatry* 2003;**183**:22-7.
5. PLoS Med Editors. Ghostwriting: The dirty little secret of medical publishing that just got bigger. *PLoS Med* 2009;**6**:e1000156.
6. Ross JS, Hill KP, Egilman DS, *et al*. Guest authorship and ghostwriting in publications related to rofecoxib: A case study of industry documents from rofecoxib litigation. *JAMA* 2008;**299**:1800-12.
7. Woolley KL, Gertel A, Hamilton CW, *et al*. Time to finger point or fix? An invitation to join ongoing efforts to promote ethical authorship and other good publication practices. *Ann Pharmacother* 2013;**47**:1084-7.
8. Scott-Lichter D and the Editorial Policy Committee of the Council of Science Editors. CSE's White Paper on Promoting Integrity in Scientific Journal Publications, 2012 Update. Wheat Ridge, CO: 2012.  
[http://www.councilscienceeditors.org/files/public/entire\\_whitepaper.pdf](http://www.councilscienceeditors.org/files/public/entire_whitepaper.pdf) (accessed 30 December 2013).
9. Gøtzsche PC, Kassirer JP, Woolley KL, *et al*. What should be done to tackle ghostwriting in the medical literature? *PLoS Med* 2009;**6**:e23.
10. Woolley KL, Ely JA, Woolley MJ, *et al*. Declaration of medical writing assistance in international peer-reviewed publications. *JAMA* 2006;**296**:932-4.
11. Graf C, Battisti WP, Bridges D, *et al*. Research Methods & Reporting. Good publication practice for communicating company sponsored medical research: the GPP2 guidelines. *BMJ* 2009;**339**:b4330.

- 1  
2  
3  
4  
5  
6  
7  
8  
9  
10  
11  
12  
13  
14  
15  
16  
17  
18  
19  
20  
21  
22  
23  
24  
25  
26  
27  
28  
29  
30  
31  
32  
33  
34  
35  
36  
37  
38  
39  
40  
41  
42  
43  
44  
45  
46  
47  
48  
49  
50  
51  
52  
53  
54  
55  
56  
57  
58  
59  
60
12. International Committee of Medical Journal Editors. Recommendations for the conduct, reporting, editing and publication of scholarly work in medical journals. Roles and responsibilities of authors, contributors, reviewers, editors, publishers, and owners: defining the role of authors and contributors. 2013. [http://www.icmje.org/roles\\_a.html](http://www.icmje.org/roles_a.html) (accessed 30 December 2013).
13. Nastasee S. Acknowledgement of medical writers in medical journal articles: a comparison from the years 2000 and 2007. *AMWA J* 2010;**25**:2-6.
14. World Association of Medical Editors. Policy Statement: Ghost writing initiated by commercial companies, Revised 15 June 2005. <http://www.wame.org/resources/policies#ghost> (accessed 30 December 2013).
15. Editors. Ghost writers in the sky. *J Urol* 2008;**179**:809-10.
16. Woolley KL. Goodbye Ghostwriters!: How to work ethically and efficiently with professional medical writers. *Chest* 2006;**130**:921-3.
17. Jacobs A, Wager E. European Medical Writers Association (EMWA) guidelines on the role of medical writers in developing peer-reviewed publications. *Curr Med Res Opin* 2005;**21**:317-22.
18. Hamilton C. AMWA position statement on the contributions of medical writers to scientific publications. *AMWA J* 2003;**18**:13-6.
19. Bennett C, Khangura S, Brehaut J, *et al*. Reporting guidelines for survey research: an analysis of published guidance and reporting practices. *PLoS Med* 2011;**8**:e1001069.
20. Wislar JS, Flanagan A, Fontanarosa PB, *et al*. Honorary and ghost authorship in high impact biomedical journals: a cross sectional survey. *BMJ* 2011;**343**:d6128.
21. Vinther S, Rosenberg J. Appearance of ghost and gift authors in Ugeskrift for Laeger and Danish Medical Journal. *Dan Med J* 2012;**59**:1-6.
22. Price J, Dake J, Oden L. Authorship of health education articles: Guests, ghosts and trends. *Am J Health Behavior* 2000;**24**:290-9.
23. Mowatt G, Shirran L, Grimshaw JM, *et al*. Prevalence of honorary and ghost authorship in Cochrane reviews. *JAMA* 2002;**287**:2769-71.

- 1  
2  
3  
4  
5  
6  
7  
8  
9  
10  
11  
12  
13  
14  
15  
16  
17  
18  
19  
20  
21  
22  
23  
24  
25  
26  
27  
28  
29  
30  
31  
32  
33  
34  
35  
36  
37  
38  
39  
40  
41  
42  
43  
44  
45  
46  
47  
48  
49  
50  
51  
52  
53  
54  
55  
56  
57  
58  
59  
60
24. Mirzazadeh A, Navadeh S, Rokni M, *et al.* The prevalence of honorary and ghost authorships in Iranian bio-medical journals and its associated factors. *Iran J Public Health* 2011;**40**:15-21.
25. Jacobs A, Hamilton C. Decreased evidence of ghostwriting in a 2008 vs 2005 survey of medical writers. *Write Stuff* 2009;**18**:118-23.
26. Ghajarzadeh M. Guest authors in an Iranian journal. *Dev World Bioeth.* Published Online First: 1 Oct 2012. doi: 10.1111/dewb.12002.
27. Flanagan A, Carey LA, Fontanarosa PB, *et al.* Prevalence of articles with honorary authors and ghost authors in peer- reviewed medical journals. *JAMA* 1998;**280**:222-4.
28. Dotson B, Slaughter RL. Prevalence of articles with honorary and ghost authors in three pharmacy journals. *Am J Health Syst Pharm* 2011;**68**:1730-4.
29. Suda KJ, Hurley AM, McKibbin T, *et al.* Publication of noninferiority clinical trials: Changes over a 20-year interval. *Pharmacotherapy* 2011;**31**:833-9.
30. Gøtzsche PC, Hróbjartsson A, Johansen HK, *et al.* Ghost authorship in industry-initiated randomised trials. *PLoS Med* 2007;**4**:0047-52.
31. Rees T, Kelly M, Smith S. How much do healthcare professionals know about GPP authorship criteria? *Curr Med Res Opin* 2013;**29**:S18-S9.
32. Hao X, Qian S, You S, *et al.* Ghost writers and honorary authorship: a survey from the Chinese Medical Journal [abstract]. *Sixth International Congress on Peer Review and Biomedical Publication; 2009 Sept 10-12; Vancouver, BC, Canada* 2009.
33. Hamilton CW, Jacobs A. Evidence of decreased ghostwriting in a series of three surveys of medical communicators conducted between 2005 and 2011. *AMWA J* 2012;**27**:115.
34. Williams M. An inquiry by the UK House of Commons Health Select Committee into the influence of the pharmaceutical industry (18 October). 2004.  
[http://www.meactionuk.org.uk/HoC\\_Select\\_Ctte\\_Inquiry\\_into\\_Pharma.htm](http://www.meactionuk.org.uk/HoC_Select_Ctte_Inquiry_into_Pharma.htm) (accessed 30 December 2013).
35. Elliott C. Pharma goes to the laundry: Public relations and the business of medical education. *Hastings Cent Rep* 2004;**34**:18-23.

- 1  
2  
3  
4  
5  
6  
7  
8  
9  
10  
11  
12  
13  
14  
15  
16  
17  
18  
19  
20  
21  
22  
23  
24  
25  
26  
27  
28  
29  
30  
31  
32  
33  
34  
35  
36  
37  
38  
39  
40  
41  
42  
43  
44  
45  
46  
47  
48  
49  
50  
51  
52  
53  
54  
55  
56  
57  
58  
59  
60
36. Moffatt B, Elliott C. Ghost marketing: Pharmaceutical companies and ghostwritten journal articles. *Perspect Biol Med* 2007;**50**:18-31.
37. Marušić A, Bošnjak L, Jeronšić A. A systematic review of research on the meaning, ethics and practices of authorship across scholarly disciplines. *PLoS One* 2011;**6**:e23477.
38. Bailey M. Science editing and its effect on manuscript acceptance time. *AMWA J* 2011;**26**:147-52.
39. Jacobs A. Adherence to the CONSORT guideline in papers written by professional medical writers. *Write Stuff* 2010;**19**:196-200.
40. Woolley KL, Lew RA, Stretton S, *et al.* Lack of involvement of medical writers and the pharmaceutical industry in publications retracted for misconduct: a systematic, controlled, retrospective study. *Curr Med Res Opin* 2011;**27**:1175-82.
41. PLoS Med. Article metrics: Ghost authorship in industry-initiated randomised trials: PLoS Med, 2013.
42. Bavdekar SB. Authorship issues. *Lung India* 2012;**29**:76-80.
43. Bosch X. Exorcising ghostwriting. Ghostwriting could potentially have serious repercussions for science and should therefore be treated as research misconduct. *EMBO Rep* 2011;**12**:489-94.
44. Matías-Guiu J, García-Ramos R. Ghost-authors, improvement article communication, and medical publications. *Neurologia* 2011;**26**:257-61.
45. Tharyan P. Evidence-based medicine: can the evidence be trusted? *Indian J Med Ethics* 2011;**8**:201-7.
46. Wager E, Field EA, Grossman L. Good publication practice for pharmaceutical companies. *Curr Med Res Opin* 2003;**19**:149-54.
47. Scheife RT. A ghost in the machine. *Pharmacotherapy* 2009;**29**:363-4.
48. MacLennan A, Sturdee D, Fenton A, *et al.* Editorial: Ghost writers, vested interest and funding disclosures. *Climacteric* 2010;**13**:301-2.
49. Nahai F. Ghostwriting: Stringent disclosure policies take aim at authorship abuses. *Aesthet Surg J* 2010;**30**:265-6.

- 1  
2  
3  
4  
5  
6  
7  
8  
9  
10  
11  
12  
13  
14  
15  
16  
17  
18  
19  
20  
21  
22  
23  
24  
25  
26  
27  
28  
29  
30  
31  
32  
33  
34  
35  
36  
37  
38  
39  
40  
41  
42  
43  
44  
45  
46  
47  
48  
49  
50  
51  
52  
53  
54  
55  
56  
57  
58  
59  
60
50. Ngai S, Gold JL, Gill SS, *et al.* Haunted manuscripts: ghost authorship in the medical literature. *Account Res* 2005;**12**:103-14.
51. Wiwanitkit V. Ghostwriting: An existing problem. *Am J Med* 2012;**125**:e17.
52. Krinsky S. When conflict-of-interest is a factor in scientific misconduct. *Med Law* 2007;**26**:447-63.
53. Langdon-Neuner E. Medical ghost-writing. *Mens Sana Monogr* 2008;**6**:257-73.
54. Paul M. On transparency, responsibility, and accountability. *Clin Microbiol Infect* 2009;**15**:1100-2.
55. Górski A, Letkiewicz S. "Medical writing" and ghostwriting as ethical challenges in medical communication. *Transplant Proc* 2010;**42**:3335-7.
56. McHenry L. Of sophists and spin-doctors: industry-sponsored ghostwriting and the crisis of academic medicine. *Mens Sana Monogr* 2010;**8**:129-45.
57. Healy DT. Transparency and trust: figure for ghost written articles was misquoted. *BMJ* 2004;**329**:1345.
58. Mitrany D. The ghostwriting controversy: Time for a proper burial. *Science Editor* 2005;**28**:187.
59. Kmietowicz Z. Consumer organisations criticise influence of drug companies. *BMJ* 2004;**329**:937.
60. Bonita RE, Adams S, Whellan DJ. Reporting of clinical trials: publication, authorship, and trial registration. *Heart Fail Clin* 2011;**7**:561-7.
61. Anon. Ghostwriting in medical literature. *Int J Occup Environ Health* 2011;**17**:168-77.
62. Anon. High prevalence of ghost authorship in industry-initiated trials. *Nat Clin Pract Nephrol* 2007;**3**:240.
63. Baethge C. On ghost authorship and reviews: The 6th International Congress on Peer Review and Biomedical Publication. *Deutsches Arzteblatt* 2009;**106**:731-2.
64. Flanagan A. Research on authorship. What do we know about the prevalence of ghost authorship? *Council of Science Editors Annual Meeting, May 14-18, Atlanta, Georgia* 2010.

- 1  
2  
3  
4  
5  
6  
7  
8  
9  
10  
11  
12  
13  
14  
15  
16  
17  
18  
19  
20  
21  
22  
23  
24  
25  
26  
27  
28  
29  
30  
31  
32  
33  
34  
35  
36  
37  
38  
39  
40  
41  
42  
43  
44  
45  
46  
47  
48  
49  
50  
51  
52  
53  
54  
55  
56  
57  
58  
59  
60
65. Murray S, Brophy J, Palepu A. Open Medicine's ghost and guest authorship policy. *Open Med* 2010;**4**:e11-2.
66. Moore N. Transparency and trust: Clear definition of ghost writing would be helpful. *BMJ* 2004;**329**:1345-6.
67. Hargreaves S. Industry funded trials often have ghost authorship. *BMJ* 2007;**334**:223.
68. Jones N. Ghosts still present in the medical machine. *Nature* 2009;**461**:325.

For peer review only



## FIGURE LEGENDS

**Figure 1. Selection of publications reporting a numerical estimate of the prevalence of ghostwriting.** Electronic databases were searched on 23 May 2013.

<sup>a</sup> Journal of the European Medical Writers Association, formerly known as The Write Stuff.

<sup>b</sup> Journal of the American Medical Writers Association.

<sup>c</sup> Council of Science Editors Annual Meetings.

<sup>d</sup> International Congress on Peer Review and Biomedical Publication.

**Figure 2. Case study of original versus cited evidence of ghostwriting prevalence.**

Contrast between original evidence on the prevalence of possible ghostwriting in sertraline publications from 1998 to 2000 and the subsequent citations of this evidence. Source of the original published evidence: Healy and Cattell[4] showed that 55 of 96 (57%) articles published on sertraline from 1998 to 2000 were coordinated through a medical communications company and concluded that these data provided information on the “possible extent of ghostwriting based on a single drug”. Inaccurate reporting from the cited source is marked with a cross.



Figure 1. Selection of publications reporting a numerical estimate of the prevalence of ghostwriting.

Electronic databases were searched on 23 May 2013.

a Journal of the European Medical Writers Association, formerly known as The Write Stuff.

b Journal of the American Medical Writers Association.

c Council of Science Editors Annual Meetings.

d International Congress on Peer Review and Biomedical Publication.

82x76mm (300 x 300 DPI)



Figure 2. Case study of original versus cited evidence of ghostwriting prevalence. Contrast between original evidence on the prevalence of possible ghostwriting in sertraline publications from 1998 to 2000 and the subsequent citations of this evidence. Source of the original published evidence: Healy and Cattell[4] showed that 55 of 96 (57%) articles published on sertraline from 1998 to 2000 were coordinated through a medical communications company and concluded that these data provided information on the “possible extent of ghostwriting based on a single drug”. Inaccurate reporting from the cited source is marked with a cross.

170x83mm (300 x 300 DPI)

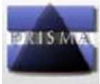

# PRISMA 2009 Checklist

1  
2  
3  
4  
5  
6  
7  
8  
9  
10  
11  
12  
13  
14  
15  
16  
17  
18  
19  
20  
21  
22  
23  
24  
25  
26  
27  
28  
29  
30  
31  
32  
33  
34  
35  
36  
37  
38  
39  
40  
41  
42  
43  
44  
45  
46  
47  
48  
49

| Section/topic             | #  | Checklist item                                                                                                                                                                                                                                                                                              | Reported on page #                                                                                                                                                                                                                                                                                 |
|---------------------------|----|-------------------------------------------------------------------------------------------------------------------------------------------------------------------------------------------------------------------------------------------------------------------------------------------------------------|----------------------------------------------------------------------------------------------------------------------------------------------------------------------------------------------------------------------------------------------------------------------------------------------------|
| <b>TITLE</b>              |    |                                                                                                                                                                                                                                                                                                             |                                                                                                                                                                                                                                                                                                    |
| Title                     | 1  | Identify the report as a systematic review, meta-analysis, or both.                                                                                                                                                                                                                                         | p. 1                                                                                                                                                                                                                                                                                               |
| <b>ABSTRACT</b>           |    |                                                                                                                                                                                                                                                                                                             |                                                                                                                                                                                                                                                                                                    |
| Structured summary        | 2  | Provide a structured summary including, as applicable: background; objectives; data sources; study eligibility criteria, participants, and interventions; study appraisal and synthesis methods; results; limitations; conclusions and implications of key findings; systematic review registration number. | pp. 2/3                                                                                                                                                                                                                                                                                            |
| <b>INTRODUCTION</b>       |    |                                                                                                                                                                                                                                                                                                             |                                                                                                                                                                                                                                                                                                    |
| Rationale                 | 3  | Describe the rationale for the review in the context of what is already known.                                                                                                                                                                                                                              | p. 5                                                                                                                                                                                                                                                                                               |
| Objectives                | 4  | Provide an explicit statement of questions being addressed with reference to participants, interventions, comparisons, outcomes, and study design (PICOS).                                                                                                                                                  | p. 6                                                                                                                                                                                                                                                                                               |
| <b>METHODS</b>            |    |                                                                                                                                                                                                                                                                                                             |                                                                                                                                                                                                                                                                                                    |
| Protocol and registration | 5  | Indicate if a review protocol exists, if and where it can be accessed (e.g., Web address), and, if available, provide registration information including registration number.                                                                                                                               | A review protocol was prepared that prespecified the primary and secondary objectives of the literature review, eligibility criteria, data to be collected, and primary and secondary outcome measures. The review protocol was not registered in a public registry but is available upon request. |
| Eligibility criteria      | 6  | Specify study characteristics (e.g., PICOS, length of follow-up) and report characteristics (e.g., years considered, language, publication status) used as criteria for eligibility, giving rationale.                                                                                                      | p. 7                                                                                                                                                                                                                                                                                               |
| Information sources       | 7  | Describe all information sources (e.g., databases with dates of coverage, contact with study authors to identify additional studies) in the search and date last searched.                                                                                                                                  | p. 6                                                                                                                                                                                                                                                                                               |
| Search                    | 8  | Present full electronic search strategy for at least one database, including any limits used, such that it could be repeated.                                                                                                                                                                               | p. 6                                                                                                                                                                                                                                                                                               |
| Study selection           | 9  | State the process for selecting studies (i.e., screening, eligibility, included in systematic review, and, if applicable, included in the meta-analysis).                                                                                                                                                   | pp. 6/7                                                                                                                                                                                                                                                                                            |
| Data collection process   | 10 | Describe method of data extraction from reports (e.g., piloted forms, independently, in duplicate) and any processes for obtaining and confirming data from investigators.                                                                                                                                  | p. 7                                                                                                                                                                                                                                                                                               |

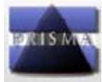

# PRISMA 2009 Checklist

1  
2  
3  
4  
5  
6  
7  
8  
9  
10  
11  
12  
13  
14  
15  
16  
17  
18  
19  
20  
21  
22  
23  
24  
25  
26  
27  
28  
29  
30  
31  
32  
33  
34  
35  
36  
37  
38  
39  
40  
41  
42  
43  
44  
45  
46  
47  
48  
49

|                                    |    |                                                                                                                                                                                                                        |                                                                                                                                                                                                                                                                                                                                                                                                                                                                                                                               |
|------------------------------------|----|------------------------------------------------------------------------------------------------------------------------------------------------------------------------------------------------------------------------|-------------------------------------------------------------------------------------------------------------------------------------------------------------------------------------------------------------------------------------------------------------------------------------------------------------------------------------------------------------------------------------------------------------------------------------------------------------------------------------------------------------------------------|
| Data items                         | 11 | List and define all variables for which data were sought (e.g., PICOS, funding sources) and any assumptions and simplifications made.                                                                                  | p. 7                                                                                                                                                                                                                                                                                                                                                                                                                                                                                                                          |
| Risk of bias in individual studies | 12 | Describe methods used for assessing risk of bias of individual studies (including specification of whether this was done at the study or outcome level), and how this information is to be used in any data synthesis. | Risk of bias was not conducted formally because data were not synthesised and because of the various study types retrieved. Given the various study designs and methods used across the retrieved studies, the quality of the study methods were assessed on a study-by-study basis. The key factors considered were the study design, definition of ghostwriting used, and study population. The factors considered when determining the quality of the cross-sectional surveys are described in the Methods section (p. 7). |
| Summary measures                   | 13 | State the principal summary measures (e.g., risk ratio, difference in means).                                                                                                                                          | Not applicable because study data were not synthesised                                                                                                                                                                                                                                                                                                                                                                                                                                                                        |
| Synthesis of results               | 14 | Describe the methods of handling data and combining results of studies, if done, including measures of consistency (e.g., $I^2$ ) for each meta-analysis.                                                              | Not applicable because study data were not synthesised.                                                                                                                                                                                                                                                                                                                                                                                                                                                                       |

Page 1 of 2

| Section/topic               | #  | Checklist item                                                                                                                                                  | Reported on page #                                                                                                                                                                                                                         |
|-----------------------------|----|-----------------------------------------------------------------------------------------------------------------------------------------------------------------|--------------------------------------------------------------------------------------------------------------------------------------------------------------------------------------------------------------------------------------------|
| Risk of bias across studies | 15 | Specify any assessment of risk of bias that may affect the cumulative evidence (e.g., publication bias, selective reporting within studies).                    | Risk of bias across studies was not conducted formally because data were not synthesised and because of the considerable variation in study designs, populations, and definitions of ghostwriting used in the retrieved publications.      |
| Additional analyses         | 16 | Describe methods of additional analyses (e.g., sensitivity or subgroup analyses, meta-regression), if done, indicating which were pre-specified.                | No additional analyses were conducted                                                                                                                                                                                                      |
| <b>RESULTS</b>              |    |                                                                                                                                                                 |                                                                                                                                                                                                                                            |
| Study selection             | 17 | Give numbers of studies screened, assessed for eligibility, and included in the review, with reasons for exclusions at each stage, ideally with a flow diagram. | 8, Figure 1                                                                                                                                                                                                                                |
| Study characteristics       | 18 | For each study, present characteristics for which data were extracted (e.g., study size, PICOS, follow-up period) and provide the citations.                    | 8-11, 15, Tables 1-3                                                                                                                                                                                                                       |
| Risk of bias within studies | 19 | Present data on risk of bias of each study and, if available, any outcome level assessment (see item 12).                                                       | Risk of bias was not conducted formally because data were not synthesised. All studies retrieved were limited by the observational nature of the data collection. The quality of individual components of each study are listed in Table 1 |

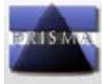

# PRISMA 2009 Checklist

1  
2  
3  
4  
5  
6  
7  
8  
9  
10  
11  
12  
13  
14  
15  
16  
17  
18  
19  
20  
21  
22  
23  
24  
25  
26  
27  
28  
29  
30  
31  
32  
33  
34  
35  
36  
37  
38  
39  
40  
41  
42  
43  
44  
45  
46  
47  
48  
49

|                               |    |                                                                                                                                                                                                          |                                                                                                                                                                                                     |
|-------------------------------|----|----------------------------------------------------------------------------------------------------------------------------------------------------------------------------------------------------------|-----------------------------------------------------------------------------------------------------------------------------------------------------------------------------------------------------|
|                               |    |                                                                                                                                                                                                          | and are summarised in the results section (Publication Characteristics) (pp. 8/9).                                                                                                                  |
| Results of individual studies | 20 | For all outcomes considered (benefits or harms), present, for each study: (a) simple summary data for each intervention group (b) effect estimates and confidence intervals, ideally with a forest plot. | Tables 1-3                                                                                                                                                                                          |
| Synthesis of results          | 21 | Present results of each meta-analysis done, including confidence intervals and measures of consistency.                                                                                                  | Not applicable because study data were not synthesised                                                                                                                                              |
| Risk of bias across studies   | 22 | Present results of any assessment of risk of bias across studies (see Item 15).                                                                                                                          | Not applicable because study data were not synthesised and because of the considerable variation in study designs, populations, and definitions of ghostwriting used in the retrieved publications. |
| Additional analysis           | 23 | Give results of additional analyses, if done (e.g., sensitivity or subgroup analyses, meta-regression [see Item 16]).                                                                                    | No additional analyses were conducted                                                                                                                                                               |
| <b>DISCUSSION</b>             |    |                                                                                                                                                                                                          |                                                                                                                                                                                                     |
| Summary of evidence           | 24 | Summarize the main findings including the strength of evidence for each main outcome; consider their relevance to key groups (e.g., healthcare providers, users, and policy makers).                     | 20-24                                                                                                                                                                                               |
| Limitations                   | 25 | Discuss limitations at study and outcome level (e.g., risk of bias), and at review-level (e.g., incomplete retrieval of identified research, reporting bias).                                            | 20-22                                                                                                                                                                                               |
| Conclusions                   | 26 | Provide a general interpretation of the results in the context of other evidence, and implications for future research.                                                                                  | 22-24                                                                                                                                                                                               |
| <b>FUNDING</b>                |    |                                                                                                                                                                                                          |                                                                                                                                                                                                     |
| Funding                       | 27 | Describe sources of funding for the systematic review and other support (e.g., supply of data); role of funders for the systematic review.                                                               | No funding was received to conduct this study                                                                                                                                                       |

From: Moher D, Liberati A, Tetzlaff J, Altman DG, The PRISMA Group (2009). Preferred Reporting Items for Systematic Reviews and Meta-Analyses: The PRISMA Statement. PLoS Med 6(6): e1000097. doi:10.1371/journal.pmed1000097

For more information, visit: [www.prisma-statement.org](http://www.prisma-statement.org).

# BMJ Open

## Systematic review on the primary and secondary reporting of the prevalence of ghostwriting in the medical literature

|                                 |                                                             |
|---------------------------------|-------------------------------------------------------------|
| Journal:                        | <i>BMJ Open</i>                                             |
| Manuscript ID:                  | bmjopen-2013-004777.R2                                      |
| Article Type:                   | Research                                                    |
| Date Submitted by the Author:   | 19-Jun-2014                                                 |
| Complete List of Authors:       | Stretton, Serina; ProScribe,                                |
| <b>Primary Subject Heading</b>: | Medical publishing and peer review                          |
| Secondary Subject Heading:      | Ethics                                                      |
| Keywords:                       | MEDICAL ETHICS, systematic review, ghostwriting, authorship |
|                                 |                                                             |

SCHOLARONE™  
Manuscripts

Review only

**TITLE**

Systematic review on the primary and secondary reporting of the prevalence of ghostwriting  
in the medical literature

**AUTHOR**

Serina Stretton, PhD CMPP

**AUTHOR'S AFFILIATION**

ProScribe – Envision Pharma Group, Sydney, NSW, Australia

**AUTHOR FOR CORRESPONDENCE**

Serina Stretton, PhD, CMPP

ProScribe – Envision Pharma Group

18 Poulet St

Matrville, NSW, 2036

AUSTRALIA

Tel: + 612 9661 0768

Fax: + 617 5474 9156

Email: serina.stretton@EnvisionPharmaGroup.com

**KEYWORDS**

Authorship, ghostwriting, systematic review

**WORD COUNT**

3,967



## ABSTRACT

**Background:** Ghostwriting of industry-sponsored articles is unethical and is perceived to be common practice.

**Objective:** To systematically review how evidence for the prevalence of ghostwriting is reported in the medical literature.

**Data sources:** MEDLINE via PubMed 1966+, EMBASE 1966+, The Cochrane Library 1988+, Medical Writing 1998+, The AMWA Journal 1986+, Council of Science Editors Annual Meetings 2007+, and the Peer Review Congress 1994+ were searched electronically (23 May 2013) using the search terms ghostwrit\*, ghostauthor\*, ghost AND writ\*, ghost AND author\*.

**Eligibility criteria:** All publication types were considered; only publications reporting a numerical estimate of possible ghostwriting prevalence were included.

**Data extraction:** Two independent reviewers screened the publications; discrepancies were resolved by consensus. Data to be collected included a numerical estimate of the prevalence of possible ghostwriting (primary outcome measure), definitions of ghostwriting reported, source of the reported prevalence, publication type and year, study design, and sample population.

**Results:** Of the 848 publications retrieved and screened for eligibility, 48 reported numerical estimates for the prevalence of possible ghostwriting. Sixteen primary publications reported findings from cross-sectional surveys or descriptive analyses of published articles; 32 secondary publications cited published or unpublished evidence. Estimates on the prevalence of possible ghostwriting in primary and secondary publications varied markedly. Primary estimates were not suitable for meta-analysis because of the various definitions of ghostwriting used, study designs, and types of populations or samples. Secondary estimates were not always reported or cited correctly or appropriately.

**Conclusions:** Evidence for the prevalence of ghostwriting in the medical literature is limited and can be outdated, misleading, or mistaken. Researchers should not inflate estimates

1  
2  
3  
4  
5  
6  
7  
8  
9  
10  
11  
12  
13  
14  
15  
16  
17  
18  
19  
20  
21  
22  
23  
24  
25  
26  
27  
28  
29  
30  
31  
32  
33  
34  
35  
36  
37  
38  
39  
40  
41  
42  
43  
44  
45  
46  
47  
48  
49  
50  
51  
52  
53  
54  
55  
56  
57  
58  
59  
60

using nonstandard definitions of ghostwriting nor conflate ghostwriting with other unethical authorship practices. Editors and peer reviewers should not accept articles that incorrectly cite or interpret primary publications that report the prevalence of ghostwriting.

For peer review only

## Strengths

- First systematic review on the reporting of the prevalence of ghostwriting in the medical literature
- A broad search strategy was employed with few restrictions to minimize any potential for publication or language bias; there were no restrictions on language.
- All study designs and publication types were considered

## Limitations

- Study heterogeneity in the outcomes reported and populations investigated precluded synthesis of the data
- Retrospective and self-reported nature of the data collection increased the risk of selection bias in the studies
- Most included studies were not broadly representative of the peer-reviewed medical literature

## INTRODUCTION

Ghostwriting occurs when paid or unpaid writing contributions to a manuscript that do not meet authorship criteria are not disclosed in the acknowledgments.[1] This practice is considered to be distinct from ghost authoring, where contributions to a manuscript that do merit authorship are not disclosed in the author byline.[1] However, part of the challenge in understanding the prevalence of ghostwriting is the current confusion surrounding these unethical practices. For example, the widely used Council of Science Editors definition of ghost authors (ie, individuals who participate in research, data analysis, and/or writing of a manuscript but are not named or disclosed in the author byline or acknowledgments) does not distinguish between ghost authors and ghostwriters.[2]

Ghostwriting of peer-reviewed journal publications in the medical literature is believed to be common practice.[3-5] This belief is supported, to a large extent, by highly publicized cases, primarily from the 1990s and early 2000s, of pharmaceutical companies and authors who had used ghostwriters to prepare manuscripts for publication in medical journals.[6-8] Such cases are highly unethical because the role of the commercial sponsor and any other potential conflicts of interest were hidden. Estimating the prevalence of ghostwriting in the medical literature has been hindered not only by the different definitions of ghostwriting and ghost authoring, but also by the failure of authors to distinguish ghostwriting, which is unethical, from professional medical writing support, which is ethical.[9, 10] Ghostwriters keep their involvement in a manuscript hidden, whereas professional medical writers disclose their involvement and follow ethical publication practices.[1, 9-11] Consistent with the authorship criteria recommended by the International Committee of Medical Journal Editors (ICMJE), professional medical writers who provide writing assistance and do not meet all of the ICMJE authorship criteria, should be acknowledged rather than listed as authors.[12] The prevalence of disclosed professional medical writing assistance in medical journals has been estimated to be between 6.0% and 11.0%[10, 13] and the legitimate value

1  
2  
3 that this medical writing assistance can bring to improving the quality, timeliness, and  
4 integrity of reporting in medical journals has been demonstrated.[1, 14, 15] However, the  
5 exact prevalence of ghostwriting and other forms of undisclosed contributions to papers  
6 published in medical journals is unknown.  
7  
8  
9

10  
11  
12  
13 The primary objective of this study was to conduct the first systematic review on how the  
14 prevalence of ghostwriting is reported in the medical literature. The secondary objectives  
15 were to assess the variability of the reported estimates of the prevalence of ghostwriting and  
16 investigate the source for these estimates.  
17  
18  
19  
20  
21  
22  
23  
24  
25  
26  
27  
28  
29  
30  
31  
32  
33  
34  
35  
36  
37  
38  
39  
40  
41  
42  
43  
44  
45  
46  
47  
48  
49  
50  
51  
52  
53  
54  
55  
56  
57  
58  
59  
60

## MATERIALS AND METHODS

### Literature search strategy

A search strategy was developed to retrieve publications from the medical literature that reported quantitative estimates of the prevalence of ghostwriting. The following databases were searched on 23 May 2013: MEDLINE via PubMed (1966+); EMBASE (1966+); The Cochrane Library, including the Cochrane Database of Systematic Reviews and Cochrane Central Register of Controlled Trials (1988+); The AMWA Journal (1986+, journal of the American Medical Writers Association); Medical Writing (1998+, journal of the European Medical Writers Association, formerly known as The Write Stuff); Council of Science Editors annual meetings (2007+); and the International Congress on Peer Review and Biomedical Publication meetings (1994+). General text was searched using the following search terms: ghostwrit\*, ghostauthor\*, ghost AND writ\*, ghost AND author\*. Truncation symbols and Boolean operators (AND, OR) were used wherever possible.

Two reviewers (SS, SMG) independently screened the title and abstracts of all retrieved publications using prespecified eligibility criteria; the full text of potentially eligible publications was screened to confirm eligibility for inclusion. Any discrepancies between the reviewers were resolved by consensus. The reference lists of relevant reviews and other publications were screened by hand to identify any additional publications for inclusion.

### Eligibility criteria

The eligibility criteria were prespecified. Publications were included if they reported a numerical estimate of the prevalence of possible ghostwriting. Publications were excluded if they were duplicate publications from different databases or abstracts of subsequently published full-text articles, did not report any outcomes related to ghostwriting, or reported qualitative estimate(s) of the prevalence of possible ghostwriting. No restrictions on language were included in the eligibility criteria. If needed, the abstracts of publications

1  
2  
3 written in non-English language were to be translated to assist in screening for eligibility. If  
4 publications were eligible for inclusion, the full text of the publications were to be translated  
5 to English.  
6  
7  
8  
9

### 10 11 **Data extraction and analysis**

12 The primary and secondary outcomes and data to be collected were prespecified. Data to  
13 be collected included publication type and year, study design and sample population,  
14 definitions of ghostwriting reported, reported prevalence of possible ghostwriting, and the  
15 source of the reported prevalence of ghostwriting. The prevalence of possible ghostwriting  
16 was reported as published. No unpublished data from the retrieved literature were reported  
17 and values for prevalence were not extrapolated from published data.  
18  
19  
20  
21  
22  
23  
24  
25  
26

27 The primary outcome measure for the systematic review was a numerical estimate of the  
28 prevalence of possible ghostwriting. The reported definitions of possible ghostwriting were  
29 categorized according to the following standard definitions, irrespective of the term used to  
30 describe the practice in the publication. Undisclosed writing contributions to a manuscript  
31 were defined as (i) ghostwriting if they were described as not meriting authorship and were  
32 not listed in the acknowledgments[9, 16] and (ii) ghost authoring if they did merit authorship  
33 and were not listed in the author byline.[1] Consistent with recommendations from  
34 international medical journal editors,[12, 14] Good Publication Practice guidelines,[11] and  
35 professional medical writing associations,[17, 18] disclosed writing contributions to a  
36 manuscript that did not merit authorship and were disclosed in the acknowledgments were  
37 not categorized as ghostwriting.  
38  
39  
40  
41  
42  
43  
44  
45  
46  
47  
48  
49

50 The key factors considered when assessing study quality were study design, the population  
51 assessed, and how ghostwriting was defined. While there is no consensus on the best  
52 practice for reporting survey research,[19] the quality of the cross-sectional surveys was  
53  
54  
55  
56  
57  
58  
59  
60

1  
2  
3  
4  
5  
6  
7  
8  
9  
10  
11  
12  
13  
14  
15  
16  
17  
18  
19  
20  
21  
22  
23  
24  
25  
26  
27  
28  
29  
30  
31  
32  
33  
34  
35  
36  
37  
38  
39  
40  
41  
42  
43  
44  
45  
46  
47  
48  
49  
50  
51  
52  
53  
54  
55  
56  
57  
58  
59  
60

determined by an assessment of the following factors: validation or pretesting of the survey questions, anonymity of the response, sample size, and response rate.

For peer review only



## RESULTS

### Publication selection

A total of 848 articles were retrieved from the literature search, 800 were excluded, and 48 met the eligibility criteria and were included in the systematic review (Figure 1). The main reasons for exclusion were publications not relevant to ghostwriting (n = 539), duplicate publications from different databases (n = 129), and publications not reporting a numerical estimate of the prevalence of possible ghostwriting (n = 124). The titles or abstracts of the 8 publications that were excluded because the full text or abstract could not be retrieved were reviewed; none were considered to report a numerical estimate of the prevalence of possible ghostwriting. Overall, eligible publications included 16 primary publications that reported original research on the prevalence of possible ghostwriting and 32 secondary publications that cited published or unpublished evidence of possible ghostwriting.

### Primary publications

#### Publication characteristics

Of the 16 primary publications (Table 1), there were 13 full-text publications[6, 8, 20-30] and three conference abstracts[31-33] that reported a numerical estimate of possible ghostwriting. Twelve publications[20-28, 31-33] reported findings from cross-sectional surveys and four publications[6, 8, 29, 30] reported findings from descriptive analyses of published articles. Most cross-sectional surveys were reasonably well reported. The surveys used were not validated but most included pretested questions, required an anonymous response, were conducted in targeted populations (ie, all individuals invited to participate were involved in the preparation of peer-reviewed manuscripts), and reported a sample size and response rate. Of the cross-sectional surveys conducted in targeted populations (eg, corresponding or first authors), six had response rates greater than 50%, two had response rates less than 50%, and one did not report a response rate (Table 1). Of the cross-sectional surveys conducted in nontargeted populations (eg, individuals invited to participate who may

or may not have been involved in providing medical writing assistance for peer-reviewed publications), three had low (12% to 28%) response rates and one did not report a response rate (Table 1).

**Table 1.** Characteristics of Primary Publications Reporting Original Evidence of Ghostwriting

| Publication                                                              | Population                               | Survey description                                        | Data collected    | N   | RR  |
|--------------------------------------------------------------------------|------------------------------------------|-----------------------------------------------------------|-------------------|-----|-----|
| <b><i>Cross-sectional surveys – authors or corresponding authors</i></b> |                                          |                                                           |                   |     |     |
| Flanagin 1998[27]                                                        | 6 general medicine journals <sup>a</sup> | Self-administered, postal, anonymous, pretested, targeted | 1996              | 809 | 69% |
| Mowatt 2002[23]                                                          | Published Cochrane reviews               | Self-administered, online, anonymous, pretested, targeted | 1999              | 362 | 63% |
| Hao 2009[32] (Abstract)                                                  | Chin Med J                               | Self-administered, email, not anonymous, targeted         | 2008 <sup>c</sup> | 220 | 86% |
| Dotson 2011[28]                                                          | 3 pharmacy journals                      | Self-administered, online, anonymous, pretested, targeted | 2009              | 112 | 25% |
| Mirzazadeh 2011[24]                                                      | 3 Iranian journals                       | Self-administered, email, not anonymous, targeted         | 2009-2010         | NR  | NR  |
| Wislar 2011[20]                                                          | 6 general medicine journals <sup>b</sup> | Self-administered, online, anonymous, pretested, targeted | 2008              | 622 | 70% |
| Ghajarzadeh 2012[26]                                                     | Arch Iran Med (based on student theses)  | Self-administered, email, anonymous, targeted             | 2005-2007         | 30  | 49% |
| Vinther 2012[21]                                                         | Ugeskr Laeger & Dan Med J                | Self-administered, online, anonymous, pretested, targeted | 2010              | 272 | 62% |
| <b><i>Cross-sectional surveys – healthcare professionals</i></b>         |                                          |                                                           |                   |     |     |
| Price 2000[22]                                                           | Health academic staff                    | Self-administered, postal, anonymous, pretested, targeted | NR                | 166 | 59% |
| Rees 2013[31] (Abstract)                                                 | Registered users of EPG Online           | Self-administered, online, anonymous, nontargeted         | NR                | 295 | NR  |

---

**Cross-sectional surveys – members of medical writing associations**

|          |             |                                                 |      |     |                  |
|----------|-------------|-------------------------------------------------|------|-----|------------------|
| Jacobs   | EMWA / AMWA | Self-administered, online,                      | 2005 | 843 | 28%              |
| 2009[25] | members     | anonymous, pretested,<br>nontargeted            | 2008 | 773 | 14%              |
| Hamilton | EMWA / AMWA | Self-administered, online,                      | 2011 | 620 | 12% <sup>d</sup> |
| 2012[33] | members     | anonymous, pretested,<br>(Abstract) nontargeted |      |     |                  |

---

**Publication reviews and descriptive analysis**

|               |                                                 |    |               |     |    |
|---------------|-------------------------------------------------|----|---------------|-----|----|
| Healy 2003[6] | Articles on sertraline                          | NA | 1998-<br>2000 | 96  | NA |
| Gøtzsche      | Articles on Danish                              | NA | NR            | 44  | NA |
| 2007[30]      | industry-initiated trials<br>approved 1994-1995 |    |               |     |    |
| Ross 2008[8]  | Reviews on rofecoxib                            | NA | 1996-<br>2004 | 72  | NA |
|               | associated with Merck<br>support                |    |               |     |    |
| Suda 2011[29] | Noninferiority clinical<br>trials               | NA | 1989-<br>2009 | 583 | NA |

---

<sup>a</sup> Annals of Internal Medicine, JAMA, the New England Journal of Medicine, American Journal of Cardiology, American Journal of Medicine, American Journal of Obstetrics and Gynecology.

<sup>b</sup> Annals of Internal Medicine, JAMA, the New England Journal of Medicine, Lancet, Nature Medicine, PLoS Medicine.

<sup>c</sup> Submission date.

<sup>d</sup> Personal communication, C. Hamilton.

Abbreviations: AMWA, American Medical Writers Association; EMWA, European Medical Writers Association; NA, not applicable; NR, not reported; RR, response rate.

1  
2  
3 Not all cross-sectional surveys were broadly representative of the peer-reviewed medical  
4 literature. The cross-sectional surveys were conducted in single populations of academic  
5 staff or healthcare professionals[22, 31], members of medical writing associations[25, 33], or  
6  
7 corresponding or first authors. The corresponding or first authors were surveyed from single  
8  
9 journals (Cochrane reviews, Chinese Medical Journal, Archives of Iranian Medicine),[23, 26,  
10  
11 32] two Danish journals,[21] three Iranian journals,[24] and three pharmacy journals.[28] Two  
12  
13 cross-sectional surveys of corresponding authors were conducted in six general medicine  
14  
15 journals.[20, 27]  
16  
17  
18  
19  
20

21 The descriptive analyses of published articles were conducted in single populations and  
22  
23 included an analysis of sertraline publications from 1998 to 2000,[6] rofecoxib reviews from  
24  
25 1996 to 2004,[8] publications from industry-initiated trials in Denmark from 1994 to 1995,[30]  
26  
27 and from published noninferiority trials from 1989 to 2009.[29]  
28  
29  
30

### 31 Reported prevalence of ghostwriting

32  
33 The reported prevalence of possible ghostwriting in the primary publications varied markedly  
34  
35 and were not suitable for meta-analysis because of the different populations assessed, the  
36  
37 different methods used to generate the estimates, and the various definitions that were used  
38  
39 (Tables 1 and 2). All cross-sectional surveys reported a definition of ghostwriting or ghost  
40  
41 authoring, but most definitions did not differentiate contributions that merited authorship from  
42  
43 those that did not merit authorship (Table 2).  
44  
45  
46  
47  
48  
49  
50  
51  
52  
53  
54  
55  
56  
57  
58  
59  
60

**Table 2.** Primary Publications Reporting Estimates of the Prevalence of Possible Ghostwriting

| Publication                                                                               | Measure of Possible Ghostwriting Reported by Authors                                                                                                                             | Estimate % (n)                                                                       |
|-------------------------------------------------------------------------------------------|----------------------------------------------------------------------------------------------------------------------------------------------------------------------------------|--------------------------------------------------------------------------------------|
| <b><i>Cross-sectional surveys reporting ghostwriting</i></b>                              |                                                                                                                                                                                  |                                                                                      |
| Flanagin 1998[27]                                                                         | Unnamed individual who participated in the writing                                                                                                                               | 1.4% (11/809) of articles                                                            |
| Wislar 2011[20]                                                                           | Unnamed individual who participated in the writing                                                                                                                               | 0.2% <sup>a</sup> (1/622) of articles                                                |
| Jacobs 2009,<br>Hamilton 2012[25,<br>33]                                                  | Undisclosed medical writing assistance not qualifying for authorship                                                                                                             | 2005: 61.8% (NR)<br>2009: 41.7% (NR)<br>2011: 33.0% (NR)<br>of articles <sup>b</sup> |
| <b><i>Cross-sectional surveys reporting combined ghost authoring and ghostwriting</i></b> |                                                                                                                                                                                  |                                                                                      |
| Flanagin 1998[27]                                                                         | Failure to name, as an author, individuals who made substantial contributions to the research or writing or an unidentified medical writer                                       | 11.5% (93/809) of articles                                                           |
| Price 2000[22]                                                                            | Failure to name, as an author, individuals who made substantial contributions to the research or writing                                                                         | 24.1% (40/166) of authors                                                            |
| Mowatt 2002[23]                                                                           | Individual merited authorship or had assisted with drafting but not listed as an author or acknowledged                                                                          | 8.8% (32/362) of articles                                                            |
| Hao 2009[32]                                                                              | English-language speakers assisted with writing but not identified as authors or acknowledged                                                                                    | 10.4% (NR) of authors                                                                |
| Dotson 2011[28]                                                                           | Failure to name, as an author, individuals who made substantial contributions to the research or writing                                                                         | 0.9% (1/112) of articles                                                             |
| Wislar 2011[20]                                                                           | Failure to name, as an author, individuals who made substantial contributions to the research or writing of the article or an unnamed individual who participated in the writing | 7.9% (49/622) of articles                                                            |
| <b><i>Cross-sectional surveys reporting ghost authoring</i></b>                           |                                                                                                                                                                                  |                                                                                      |
| Mirzazadeh<br>2011[24]                                                                    | Failure to name, as an author, individuals who made substantial contributions to the research                                                                                    | 21.4% (25/NR) of authors                                                             |
| Ghajarzadeh                                                                               | Failure to name, as an author, students who made substantial                                                                                                                     | 0.7% (2/296) of                                                                      |

|                  |                                                           |                                   |
|------------------|-----------------------------------------------------------|-----------------------------------|
| 2012[26]         | contributions to the research <sup>c</sup>                | articles                          |
| Vinther 2012[21] | Individual merited authorship but not listed as an author | 2.4% (6/245) of articles          |
| Rees 2013[31]    | Individual merited authorship but not listed as an author | 70% (NR/202) of published authors |

---

***Publication reviews and descriptive analysis reporting possible ghost authoring or ghostwriting***

|                   |                                                                                                                                                                                                                                 |                           |
|-------------------|---------------------------------------------------------------------------------------------------------------------------------------------------------------------------------------------------------------------------------|---------------------------|
| Healy 2003[6]     | Published articles coordinated by a medical information company, including acknowledged medical writing support <sup>d</sup>                                                                                                    | 57.3% (55/96) of articles |
| Gøtzsche 2007[30] | Individuals who wrote the trial protocol, conducted the statistical analyses, or wrote the manuscript but were not listed as authors, not members of a study group or steering committee, or not disclosed in an acknowledgment | 75.0% (33/44) of trials   |
| Ross 2008[8]      | Published reviews associated with Merck support and with a single external author <sup>e</sup>                                                                                                                                  | 69.4% (50/72) of reviews  |

---

<sup>a</sup> Available as online supplementary data.

<sup>b</sup> Values represent the mean weighted percentage of publications that were ghostwritten by respondents. Findings were weighted in proportion to the number of manuscripts the respondent wrote per year.

<sup>c</sup> Students were classified as ghostwriters if the student was not named as an author and if the results reported in the publications were based on the results of their theses.

<sup>d</sup> Authors conclude data provide quantification of the possible extent of ghostwriting based on a single drug. Of the 55 published articles that were coordinated through a medical information company, 2 included medical writing assistance that was acknowledged in the published article.

<sup>e</sup> Published review articles had been identified from correspondence between Merck and a medical publishing company, from Merck publication status reports, or were affiliated with an author named within the correspondence or publication status reports. The authors did not report whether medical writing assistance was acknowledged in the published article.

Abbreviations: NR, not reported.

1  
2  
3 Four cross-sectional surveys reported the prevalence of ghostwriting where the definition  
4 provided could be categorized as undisclosed contributions that do not merit authorship.[20,  
5 25, 27, 33] Findings from these surveys, which were repeated at different time points,  
6 suggested that the prevalence of ghostwriting is low and decreasing. Flanagin[27] and  
7 Wislar[20] conducted two similar cross-sectional surveys of corresponding authors of articles  
8 published in six general medicine journals in 1996[27] and in 2008.[20] The surveys, which  
9 included a core set of three journals (Annals of Internal Medicine, JAMA, the New England  
10 Journal of Medicine) at each time point and in targeted populations, used pretested  
11 questions that required an anonymous response and had response rates greater than 65%.  
12 The prevalence of ghost authoring (which included ghostwriting) was estimated to be 11.5%  
13 in 1996 and 7.9% in 2008. The prevalence of ghostwriting from these surveys was estimated  
14 to be 1.4% in 1996 and 0.2% in 2008. Hamilton and Jacobs conducted a cross-sectional  
15 survey of members of two medical writing associations in 2005, 2008, and 2011.[25, 33] The  
16 survey, which was not conducted in targeted populations, used pretested questions that  
17 required an anonymous response and had response rates from 12% to 28% of the total  
18 population surveyed (ie, not all participants surveyed were involved in the preparation of  
19 peer-reviewed manuscripts). Findings from these surveys showed that the mean weighted  
20 percentage of publications that were ghostwritten by respondents had decreased from  
21 61.8% in 2005 to 33.0% in 2011. Findings were weighted in proportion to the number of  
22 manuscripts the respondent wrote per year.  
23  
24  
25  
26  
27  
28  
29  
30  
31  
32  
33  
34  
35  
36  
37  
38  
39  
40  
41  
42  
43  
44

45 Six cross-sectional survey publications reported the prevalence of possible ghostwriting (ie,  
46 the prevalence of ghostwriting and ghost authoring combined).[20, 22, 23, 27, 28, 32] The  
47 prevalence of possible ghostwriting reported in these cross-sectional surveys varied from  
48 0.9% to 24.1% of publications or authors.  
49  
50  
51  
52  
53  
54  
55  
56  
57  
58  
59  
60

1  
2  
3 Four cross-sectional survey publications reported the prevalence of ghost authoring.[21, 24,  
4 26, 31] The prevalence of ghost authoring reported in these cross-sectional surveys varied  
5 from 0.7% to 70% of publications or authors.  
6  
7  
8

9  
10  
11 The descriptive analyses of published articles on sertraline and rofecoxib did not include a  
12 prespecified definition of ghost authoring or ghostwriting;[6, 8] in these studies, possible  
13 ghostwriting or ghost authoring was assumed in publications associated with industry-  
14 sponsored support (Table 2). The descriptive analysis of industry-initiated trials in Denmark  
15 used a nonstandard definition of ghost authors; in this study ghost authors were defined as  
16 individuals, not named as authors, who were involved in writing the protocol, conducting the  
17 statistical analyses, or writing the manuscript.[30] The prevalence of possible ghostwriting in  
18 the two descriptive analyses of single drugs that did not include a prespecified definition of  
19 ghostwriting was 57% of articles on sertraline published from 1998 to 2000[6] and 69% of  
20 reviews on rofecoxib published from 1996 to 2004.[8] The prevalence of possible  
21 ghostwriting in the descriptive analysis of Danish industry-initiated trials, which used a  
22 nonstandard definition of authorship, was 75% of Danish initiated trials approved in 1994 to  
23 1995.[30] The descriptive analysis of noninferiority trials[29] was not considered further as  
24 the definition of ghostwriting used was consistent with disclosed medical writing assistance.  
25 In this study ghostwriters were defined as acknowledged individuals, other than authors, who  
26 contributed to the writing and were affiliated with an industry-sponsored study.[29] The  
27 prevalence of disclosed medical writing assistance in this descriptive analysis was 17.3%  
28 (101/583) of clinical trials.  
29  
30  
31  
32  
33  
34  
35  
36  
37  
38  
39  
40  
41  
42  
43  
44  
45  
46  
47  
48  
49

## 50 **Secondary publications**

### 51 Publication characteristics

52  
53 Of the 32 secondary publications, there were 13 review articles, 10 editorials, 5  
54 commentaries, 3 news articles, and 1 government report, with most being published after  
55 2008 (Table 3). Most publications cited primary sources as evidence of the prevalence of  
56  
57  
58  
59



possible ghostwriting (Table 3), with the cited prevalence of possible ghostwriting varying from 6% of publications to 100% of publications involving drugs. In most secondary publications, the information on the prevalence of ghostwriting was not reported consistently compared with the cited evidence (Table 3). Misleading and mistaken information was reported in many publications that (i) did not distinguish between ghostwriting and ghost authoring, (ii) included acknowledged medical writing assistance or a combined estimate of guest authorship and ghost authorship as ghostwriting, (iii) generalized findings from publication reviews and analyses of specific datasets to wider populations of publications or industry-sponsored trials, or (iv) cited personal communications or informal surveys where the original source was unpublished and could not be verified (Table 3).

**Table 3.** Characteristics of Secondary Publications Citing Evidence of Possible Ghostwriting

| Publication                              | Cited evidence      | Consistent with cited source(s) | Comment                                                                     |
|------------------------------------------|---------------------|---------------------------------|-----------------------------------------------------------------------------|
| Elliot Hastings Cent Rep 2004[34]        | Primary             | No                              | Did not distinguish GW from GA                                              |
| Moffat Perspect Biol Med 2007[35]        | Primary             | No                              | Did not distinguish GW from GA                                              |
| Schiefe Pharmacotherapy 2009[36]         | Primary             | No                              | Did not distinguish GW from GA                                              |
| MacLennan Climacteric 2010[37]           | Primary             | No                              | Did not distinguish GW from GA                                              |
| Nahai Aesthet Surg J 2010[38]            | Secondary           | No                              | Did not distinguish GW from GA                                              |
| Ngai Account Res 2005[39]                | Primary             | Yes                             | Did not distinguish GW from GA                                              |
| Bosch EMBO Rep 2011[40]                  | Primary             | Yes                             | Did not distinguish GW from GA                                              |
| Wiwanitkit Am J Med 2012[41]             | Primary             | No                              | Did not distinguish GW from GA or GA from guest authorship                  |
| Krimsky Med Law 2007[42]                 | Primary             | No                              | Did not distinguish GW from GA or GA from guest authorship                  |
| Langdon-Neuner Mens Sana Monogr 2008[43] | Primary & secondary | No                              | Did not distinguish GW from GA or GW from disclosed medical writing support |

|    |                                      |             |         |                                 |
|----|--------------------------------------|-------------|---------|---------------------------------|
| 1  |                                      |             |         |                                 |
| 2  |                                      |             |         |                                 |
| 3  | Tharyan Indian J Med Ethics 2011[44] | Primary     | Yes     | Did not distinguish GW from GA  |
| 4  |                                      |             |         | or GW from disclosed medical    |
| 5  |                                      |             |         | writing assistance              |
| 6  |                                      |             |         |                                 |
| 7  |                                      |             |         |                                 |
| 8  | Paul Clin Microbiol Infect 2009[45]  | Primary     | Yes     | Did not distinguish GW / GA     |
| 9  |                                      |             |         | from disclosed medical writing  |
| 10 |                                      |             |         | assistance                      |
| 11 |                                      |             |         |                                 |
| 12 |                                      |             |         |                                 |
| 13 | Bavdekar Lung India 2012[46]         | Primary     | No      | Did not distinguish GW from GA  |
| 14 |                                      |             |         | and generalized evidence to a   |
| 15 |                                      |             |         | wider population                |
| 16 |                                      |             |         |                                 |
| 17 |                                      |             |         |                                 |
| 18 | Górski Transplant Proc 2010[47]      | Primary &   | No      | Did not distinguish GW from GA  |
| 19 |                                      | secondary   |         | and generalized evidence to a   |
| 20 |                                      |             |         | wider population                |
| 21 |                                      |             |         |                                 |
| 22 |                                      |             |         |                                 |
| 23 | Matias-Guiu Neurologia 2011[48]      | Primary &   | No      | Did not distinguish GW from GA  |
| 24 |                                      | secondary   |         | and generalized evidence to a   |
| 25 |                                      |             |         | wider population                |
| 26 |                                      |             |         |                                 |
| 27 |                                      |             |         |                                 |
| 28 | McHenry Mens Sana Monogr 2010[49]    | Gov. report | No      | Generalized evidence to a wider |
| 29 |                                      |             |         | population                      |
| 30 |                                      |             |         |                                 |
| 31 |                                      |             |         |                                 |
| 32 |                                      |             |         |                                 |
| 33 | Healy BMJ 2004[50]                   | Primary &   | No / ND | Generalized evidence to a wider |
| 34 |                                      | secondary   |         | population and reported         |
| 35 |                                      |             |         | personal opinion of GW          |
| 36 |                                      |             |         | prevalence                      |
| 37 |                                      |             |         |                                 |
| 38 |                                      |             |         |                                 |
| 39 |                                      |             |         |                                 |
| 40 |                                      |             |         |                                 |
| 41 | Abbasi BMJ 2004[4]                   | Secondary   | No      | Secondary publication cited     |
| 42 |                                      |             |         | named individual                |
| 43 |                                      |             |         |                                 |
| 44 |                                      |             |         |                                 |
| 45 | Mitrany Science Editor 2005[51]      | None        | ND      | Cited named individual          |
| 46 |                                      |             |         |                                 |
| 47 | Collier Can Med Assoc J 2009[5]      | None        | ND      | Cited named individual          |
| 48 |                                      |             |         |                                 |
| 49 | Kmietowicz BMJ 2004[52]              | None        | ND      | Cited named individual          |
| 50 |                                      |             |         |                                 |
| 51 | Matthews Wall St J 2005[3]           | None        | ND      | Cited unpublished data          |
| 52 |                                      |             |         |                                 |
| 53 | Bonita Heart Fail Clin 2011[53]      | Primary     | Yes     | Consistent with cited source    |
| 54 |                                      |             |         |                                 |
| 55 | Grassley Int J Occup Environ Health  | Primary     | Yes     | Consistent with cited source    |
| 56 | 2011[54]                             |             |         |                                 |
| 57 |                                      |             |         |                                 |
| 58 |                                      |             |         |                                 |
| 59 |                                      |             |         |                                 |
| 60 |                                      |             |         |                                 |

|    |                                       |           |     |                              |
|----|---------------------------------------|-----------|-----|------------------------------|
| 1  |                                       |           |     |                              |
| 2  |                                       |           |     |                              |
| 3  | Nat Clin Pract Nephrol 2007[55]       | Primary   | Yes | Consistent with cited source |
| 4  | Editors J Urol 2008[15]               | Primary   | Yes | Consistent with cited source |
| 5  |                                       |           |     |                              |
| 6  | Baethge Deutsches Arzteblatt 2009[56] | Primary   | Yes | Consistent with cited source |
| 7  |                                       |           |     |                              |
| 8  | Flanagin CSE Annual Mtg 2010[57]      | Primary   | Yes | Consistent with cited source |
| 9  |                                       |           |     |                              |
| 10 | Murray Open Med 2010[58]              | Primary   | Yes | Consistent with cited source |
| 11 |                                       |           |     |                              |
| 12 | Moore BMJ 2004[59]                    | Secondary | Yes | Consistent with cited source |
| 13 |                                       |           |     |                              |
| 14 | Hargreaves BMJ 2007[60]               | Primary   | Yes | Consistent with cited source |
| 15 |                                       |           |     |                              |
| 16 | Jones Nature 2009[61]                 | Primary   | Yes | Consistent with cited source |

17  
18 Abbreviations: CSE, Council of Science Editors; GA, ghost authoring; Gov, government; GW,  
19 ghostwriting; ND, not determined.  
20  
21

#### 22 Case study of misleading and mistaken evidence

23  
24 An analysis of secondary publications citing the possible prevalence of ghostwriting in  
25 sertraline publications provides an illuminating case study on how misleading or mistaken  
26 evidence can enter and remain in the medical literature. In 2003, Healy and Cattell showed  
27 that 57% (55/96) of articles on sertraline published from 1998 to 2000 were coordinated  
28 through a medical information company and only two acknowledged medical writing  
29 assistance.[6] The authors concluded that these data provided information on the “possible  
30 extent of ghostwriting based on a single drug”. In 2004 (October 14), Healy also provided  
31 evidence on the influence of the pharmaceutical industry on key groups at a United Kingdom  
32 House of Commons Health Select Committee investigation.[62] In answer to Question 197,  
33 Healy stated the following:  
34  
35  
36  
37  
38  
39  
40  
41  
42  
43  
44  
45  
46  
47

48 *“My estimate is that, even in journals like the BMJ, the Lancet, the New England Journal of*  
49 *Medicine and JAMA, the leading journals in the field, if these articles have to do with*  
50 *therapeutics, with drugs, it may be worse perhaps for psychiatry than elsewhere, but I doubt*  
51 *it, 50% of these articles are ghostwritten. It may be higher.”*  
52  
53  
54  
55  
56  
57  
58  
59  
60

1  
2  
3 Healy and Cattell's original evidence has been cited incorrectly and interchangeably with  
4 Healy's statement to the House of Commons Health Select Committee investigation (Figure  
5 2). Although findings from the primary publication have been cited and interpreted correctly in  
6  
7 two secondary publications,[34, 35] many secondary publications incorrectly cited Healy's  
8  
9 original evidence and statement to the House of Commons Health Select Committee  
10  
11 investigation (Figure 2).  
12  
13  
14  
15  
16  
17  
18  
19  
20  
21  
22  
23  
24  
25  
26  
27  
28  
29  
30  
31  
32  
33  
34  
35  
36  
37  
38  
39  
40  
41  
42  
43  
44  
45  
46  
47  
48  
49  
50  
51  
52  
53  
54  
55  
56  
57  
58  
59  
60

## DISCUSSION

This systematic review on the reported prevalence of ghostwriting in the medical literature showed that the estimates of the prevalence of ghostwriting in primary publications varied markedly and were influenced by the definitions used, the types of study designs, and the type of population or sample assessed. In addition, secondary publications often cited outdated, misleading, or mistaken evidence of the reported prevalence of ghostwriting, with many publications not distinguishing ghostwriting from ghost authoring.

Although evidence from descriptive analyses can highlight the extent of ghostwriting in single populations, evidence from well-conducted cross-sectional surveys have the potential to provide estimates of the prevalence of ghostwriting that may be generalized to the majority of peer-reviewed publications. Despite this, many of the cross-sectional surveys retrieved in this systematic review were conducted in limited populations that were not broadly representative of the peer-reviewed medical literature. In addition, many of the cross-sectional surveys did not differentiate between contributions that merited authorship from those that did not merit authorship and provided at best, an estimate of possible ghostwriting. The reported prevalence of ghostwriting, where ghostwriting was defined as undisclosed contributions that did not merit authorship, was retrieved from the two cross-sectional surveys of corresponding authors from several general medicine journals and by cross-sectional surveys (repeated on three separate occasions from 2005 to 2011) of members of two major medical writing associations. Together the findings from these surveys suggested that the prevalence of ghostwriting has decreased in recent years. However, while the findings from these surveys may be considered more broadly representative of the peer-reviewed medical literature than surveys focused on single journals, single countries, or single subject areas, interpretation of these findings should take into account that respondents were required to retrospectively self-report potentially unethical or unprofessional behaviour.

1  
2  
3  
4  
5 Unethical authorship practices are a major concern and are an increasingly recognized  
6  
7 problem in the medical literature.[63] As the findings from this systematic review suggest,  
8  
9 some of these perceived problems may arise from the considerable, but unnecessary,  
10  
11 confusion and disagreement surrounding the definitions of ghostwriting. As recognized by  
12  
13 the World Association of Medical Editors, professional medical writers can have a legitimate  
14  
15 role in assisting authors to communicate their research findings in the peer-reviewed  
16  
17 literature.[14] Professional medical writers can and do improve the timeliness and quality of  
18  
19 reporting and can assist investigators and industry sponsors to meet their ethical  
20  
21 commitments to the disclosure and publishing of clinical trial results.[1, 64-66] As such, the  
22  
23 misleading and mistaken reporting of the prevalence of ghostwriting that was evident in the  
24  
25 secondary publications retrieved in this systematic review is disappointing. Specifically, the  
26  
27 confusion surrounding definitions of ghost authorship and ghostwriting and the unbalanced  
28  
29 focus on industry as the source of unethical authorship practices in the secondary  
30  
31 publications takes attention away from the need to focus on all types of unethical  
32  
33 contributions in peer-reviewed publications, irrespective of the source of the unethical  
34  
35 practice.  
36  
37  
38

39  
40 The various definitions of ghostwriting and ghost authoring found in this systematic review  
41  
42 highlights the considerable disagreement in the medical literature with regard to the  
43  
44 definitions of ghostwriting and ghost authoring and whether a distinction should be made  
45  
46 between these unethical practices. Although the Council of Science Editors uses a  
47  
48 straightforward and broad definition of ghost authors that does not distinguish between ghost  
49  
50 authors and ghostwriters,[2] the distinction between ghost authorship and ghostwriting used  
51  
52 in this manuscript is consistent with those used in the cross-sectional surveys conducted by  
53  
54 Flanagan[67] and Wislar[68] and with the authorship criteria recommended by the ICMJE.[12]  
55  
56 Distinguishing between these practices is important because it differentiates between  
57  
58 undisclosed contributions that do and do not merit authorship. However, part of the reason  
59  
60

1  
2  
3 for the disagreement about definitions of ghost authoring and ghostwriting stems from  
4 differences of opinion in the medical literature over how authorship is defined, particularly  
5 with regard to what constitutes “substantial” contributions to a publication and the role of  
6 disclosure of contributions to a manuscript in the acknowledgments.[69] The ICMJE criteria  
7 for authorship[12] are the most well recognised authorship criteria available, but leave much  
8 about authorship undefined.[63, 70] Despite this, the recent emphasis on author  
9 accountability in the ICMJE’s fourth criterion is an attempt to better define authors as those  
10 persons who are responsible and accountable for the content of a published work. While a  
11 professional medical writer can take responsibility for the writing and how research is  
12 reported in a manuscript, the professional medical writer cannot take responsibility for the  
13 integrity of the research or be accountable for the clinical interpretation of the findings,  
14 unless he or she was involved in the generation of the research or its analysis.  
15 Responsibility for the integrity of research and accountability for the clinical interpretation of  
16 the findings is, and should always be, the responsibility of the authors. Until a more  
17 definitive model of authorship is universally accepted, the controversy and disagreement  
18 over definitions of authors, ghostwriters, and ghost authors will remain. However, no matter  
19 what term is used, the practice of misleading readers about potential competing interests  
20 and hiding contributions to a published work, no matter whether these contributions should  
21 be most appropriately disclosed in the author byline or acknowledgements section, is  
22 unethical and totally unacceptable.  
23  
24  
25  
26  
27  
28  
29  
30  
31  
32  
33  
34  
35  
36  
37  
38  
39  
40  
41  
42  
43  
44  
45

46 The strengths of this systematic review are that a broad search strategy was employed with  
47 few restrictions to minimize any potential for publication or language bias. All study designs  
48 and publication types were considered and there were no restrictions on language. Although  
49 the full text or abstracts of 8 publications could not be retrieved, omission of these  
50 publications was unlikely to have biased the findings. Review of the abstracts or titles of  
51 these publications suggested that none reported numerical estimates of the prevalence of  
52 ghostwriting. The major finding of this review was the limitations of the reported evidence of  
53  
54  
55  
56  
57  
58  
59

1  
2  
3 ghostwriting in the medical literature. These limitations included the heterogeneity among the  
4 studies in the outcomes reported and populations investigated, the observational study  
5 designs, and the retrospective nature of data collection. Given the nature of unethical  
6 authorship practices, it may not be feasible to conduct a prospective study on ghostwriting.  
7  
8 However, based on the findings from this review, recommendations can be made to help  
9 researchers, authors, editors, and peer-reviewers apply the same rigorous standards that  
10 are applied to the conduct and assessment of all clinical research and actively improve the  
11 quality of reporting of the evidence of unethical authorship practices.  
12  
13  
14  
15  
16  
17  
18  
19  
20

21 Researchers should use a standard definition of ghostwriting so that the confusion around  
22 ghostwriters and ghost authors is not perpetuated. For example, the descriptive analysis of  
23 Danish industry-initiated trials used a nonstandard definition of authorship, which is likely to  
24 have contributed to the very high prevalence of possible ghostwriting reported in this study  
25 (75%). In this study, Gøtzsche et al.[30] suggested that individuals who write the trial  
26 protocol, conduct the statistical analyses, or who contribute to the writing of a publication  
27 should be included as authors. Indeed, the prevalence of ghost authorship in this study was  
28 91% when the analyses included these individuals, irrespective of whether they had been  
29 appropriately acknowledged elsewhere. Given that the Gøtzsche et al.[30] study has been  
30 downloaded more than 3,000 times since publication[71] and cited repeatedly as evidence  
31 not only of ghost authorship but also of ghostwriting,[40, 44, 46, 48] it would have been  
32 illuminating if the authors had included an estimate of the prevalence of ghostwriting using  
33 standard definitions for comparison. In addition to using standard definitions of ghostwriting,  
34 researchers and authors should ensure that cited evidence of ghostwriting is reported  
35 accurately without unwarranted generalizations. Publications based on personal  
36 commentary should be avoided and studies that use nonstandard definitions, specific  
37 populations, or that were conducted before a change in practice (eg, before the adoption of  
38 the Good Publication Practice guidelines for communicating company sponsored research in  
39 2003 [GPP][72] and in 2009 [GPP2][11]) should be described in context.  
40  
41  
42  
43  
44  
45  
46  
47  
48  
49  
50  
51  
52  
53  
54  
55  
56  
57  
58  
59  
60



1  
2  
3  
4  
5 Editors and peer reviewers have a duty to prevent outdated, misleading, or mistaken  
6  
7 evidence on the prevalence of ghostwriting from being published and perpetuated. Close  
8  
9 attention should be paid to the internal and external validity of the study, the definitions used,  
10  
11 how the data are reported, and whether the data are interpreted within the context of current  
12  
13 practices. When assessing a submitted manuscript on ghostwriting, editors should consider  
14  
15 using peer reviewers with expertise in the appropriate study designs (eg, survey research)  
16  
17 and ethical publication practices. Collectively, these actions could help prevent further  
18  
19 questionable evidence on the prevalence of ghostwriting from being published.  
20  
21

22  
23 In conclusion, the findings from this systematic review showed that reports of the prevalence  
24  
25 of ghostwriting in the medical literature are limited by the varied definitions used to describe  
26  
27 unethical authorship practices, the types of study designs employed, and the populations  
28  
29 assessed. To improve reporting, researchers should not inflate estimates using nonstandard  
30  
31 definitions of ghostwriting nor conflate ghostwriting with other unethical authorship practices.  
32  
33 While open and transparent debate should be encouraged, editors and peer reviewers  
34  
35 should not accept articles that incorrectly cite or interpret primary publications that report the  
36  
37 prevalence of ghostwriting.  
38  
39  
40  
41  
42  
43  
44  
45  
46  
47  
48  
49  
50  
51  
52  
53  
54  
55  
56  
57  
58  
59  
60

## ACKNOWLEDGEMENT

The author acknowledges and thanks Sericka McGee, PharmD, Hamilton House, for her contributions to the conception and design of the systematic literature review and the collection and screening of articles for inclusion. Sericka McGee contributed to an earlier version of the systematic review (search dates 1966 to May 2011), which was presented at the 8th Annual Meeting, International Society for Medical Publication Professionals, 23-25 Apr 2012 and at the 72<sup>nd</sup> Annual Conference, American Medical Writers Association, 4-6 Oct 2012, Sacramento, USA. The author thanks Professor Karen Woolley, PhD, CMPP (ProScribe – Envision Pharma Group) and Dr Cindy Hamilton, PharmD, ELS (Hamilton House) for their stimulating and valuable contributions to the interpretation of the findings from this study and for their critical review during the drafting of the manuscript.

## CONTRIBUTORSHIP STATEMENT

The author, SS, contributed to the conception and design of the systematic literature review, the collection and screening of publications, and the analysis and interpretation of the findings. SS drafted and critically revised draft versions of the manuscript and gave final approval for submission.

## COMPETING INTERESTS

The author is a professional medical writer who is actively involved in national and international not-for-profit organizations that encourage ethical medical writing practices. The author has no relationships with any pharmaceutical company that might have an interest in the submitted work and has no other relationships that could be construed as a competing interest.

**FUNDING**

The author was supported (eg, reimbursement of expenses for conference travel) by her employer, ProScribe – Envision Pharma Group, for the submitted work. No other funding was received to conduct this research.

**DATA SHARING**

All data associated with the study are fully available to the author.

For peer review only

## REFERENCES

1. Woolley KL, Gertel A, Hamilton CW, *et al*. Time to finger point or fix? An invitation to join ongoing efforts to promote ethical authorship and other good publication practices. *Ann Pharmacother* 2013;**47**:1084-7.
2. Scott-Lichter D and the Editorial Policy Committee of the Council of Science Editors. CSE's White Paper on Promoting Integrity in Scientific Journal Publications, 2012 Update. Wheat Ridge, CO: 2012. [http://www.councilscienceeditors.org/files/public/entire\\_whitepaper.pdf](http://www.councilscienceeditors.org/files/public/entire_whitepaper.pdf) (accessed 30 December 2013).
3. Mathews AW. Ghost story: at medical journals, writers paid by industry play big role. *Wall St J (East Ed)* 2005:A1, A8.
4. Abbasi K. Editor's choice: Transparency and trust. *BMJ* 2004;**329**:0.8.
5. Collier R. Prevalence of ghostwriting spurs calls for transparency. *Can Med Assoc J* 2009;**181**:E161-2.
6. Healy D, Cattell D. Interface between authorship, industry and science in the domain of therapeutics. *Br J Psychiatry* 2003;**183**:22-7.
7. PLoS Med Editors. Ghostwriting: The dirty little secret of medical publishing that just got bigger. *PLoS Med* 2009;**6**:e1000156.
8. Ross JS, Hill KP, Egilman DS, *et al*. Guest authorship and ghostwriting in publications related to rofecoxib: A case study of industry documents from rofecoxib litigation. *JAMA* 2008;**299**:1800-12.
9. Gøtzsche PC, Kassirer JP, Woolley KL, *et al*. What should be done to tackle ghostwriting in the medical literature? *PLoS Med* 2009;**6**:e23.
10. Woolley KL, Ely JA, Woolley MJ, *et al*. Declaration of medical writing assistance in international peer-reviewed publications. *JAMA* 2006;**296**:932-4.
11. Graf C, Battisti WP, Bridges D, *et al*. Research Methods & Reporting. Good publication practice for communicating company sponsored medical research: the GPP2 guidelines. *BMJ* 2009;**339**:b4330.

- 1  
2  
3  
4  
5  
6  
7  
8  
9  
10  
11  
12  
13  
14  
15  
16  
17  
18  
19  
20  
21  
22  
23  
24  
25  
26  
27  
28  
29  
30  
31  
32  
33  
34  
35  
36  
37  
38  
39  
40  
41  
42  
43  
44  
45  
46  
47  
48  
49  
50  
51  
52  
53  
54  
55  
56  
57  
58  
59  
60
12. International Committee of Medical Journal Editors. Recommendations for the conduct, reporting, editing and publication of scholarly work in medical journals. Roles and responsibilities of authors, contributors, reviewers, editors, publishers, and owners: defining the role of authors and contributors. 2013. [http://www.icmje.org/roles\\_a.html](http://www.icmje.org/roles_a.html) (accessed 30 December 2013).
13. Nastasee S. Acknowledgement of medical writers in medical journal articles: a comparison from the years 2000 and 2007. *AMWA J* 2010;**25**:2-6.
14. World Association of Medical Editors. Policy Statement: Ghost writing initiated by commercial companies, Revised 15 June 2005. <http://www.wame.org/resources/policies#ghost> (accessed 30 December 2013).
15. Editors. Ghost writers in the sky. *J Urol* 2008;**179**:809-10.
16. Woolley KL. Goodbye Ghostwriters!: How to work ethically and efficiently with professional medical writers. *Chest* 2006;**130**:921-3.
17. Jacobs A, Wager E. European Medical Writers Association (EMWA) guidelines on the role of medical writers in developing peer-reviewed publications. *Curr Med Res Opin* 2005;**21**:317-22.
18. Hamilton C. AMWA position statement on the contributions of medical writers to scientific publications. *AMWA J* 2003;**18**:13-6.
19. Bennett C, Khangura S, Brehaut J, *et al*. Reporting guidelines for survey research: an analysis of published guidance and reporting practices. *PLoS Med* 2011;**8**:e1001069.
20. Wislar JS, Flanagan A, Fontanarosa PB, *et al*. Honorary and ghost authorship in high impact biomedical journals: a cross sectional survey. *BMJ* 2011;**343**:d6128.
21. Vinther S, Rosenberg J. Appearance of ghost and gift authors in Ugeskrift for Laeger and Danish Medical Journal. *Dan Med J* 2012;**59**:1-6.
22. Price J, Dake J, Oden L. Authorship of health education articles: Guests, ghosts and trends. *Am J Health Behavior* 2000;**24**:290-9.
23. Mowatt G, Shirran L, Grimshaw JM, *et al*. Prevalence of honorary and ghost authorship in Cochrane reviews. *JAMA* 2002;**287**:2769-71.

- 1  
2  
3  
4  
5  
6  
7  
8  
9  
10  
11  
12  
13  
14  
15  
16  
17  
18  
19  
20  
21  
22  
23  
24  
25  
26  
27  
28  
29  
30  
31  
32  
33  
34  
35  
36  
37  
38  
39  
40  
41  
42  
43  
44  
45  
46  
47  
48  
49  
50  
51  
52  
53  
54  
55  
56  
57  
58  
59  
60
24. Mirzazadeh A, Navadeh S, Rokni M, *et al*. The prevalence of honorary and ghost authorships in Iranian bio-medical journals and its associated factors. *Iran J Public Health* 2011;**40**:15-21.
25. Jacobs A, Hamilton C. Decreased evidence of ghostwriting in a 2008 vs 2005 survey of medical writers. *Write Stuff* 2009;**18**:118-23.
26. Ghajarzadeh M. Guest authors in an Iranian journal. *Dev World Bioeth*. Published Online First: 1 Oct 2012. doi: 10.1111/dewb.12002.
27. Flanagin A, Carey LA, Fontanarosa PB, *et al*. Prevalence of articles with honorary authors and ghost authors in peer- reviewed medical journals. *JAMA* 1998;**280**:222-4.
28. Dotson B, Slaughter RL. Prevalence of articles with honorary and ghost authors in three pharmacy journals. *Am J Health Syst Pharm* 2011;**68**:1730-4.
29. Suda KJ, Hurley AM, McKibbin T, *et al*. Publication of noninferiority clinical trials: Changes over a 20-year interval. *Pharmacotherapy* 2011;**31**:833-9.
30. Gøtzsche PC, Hróbjartsson A, Johansen HK, *et al*. Ghost authorship in industry-initiated randomised trials. *PLoS Med* 2007;**4**:0047-52.
31. Rees T, Kelly M, Smith S. How much do healthcare professionals know about GPP authorship criteria? *Curr Med Res Opin* 2013;**29**:S18-S9.
32. Hao X, Qian S, You S, *et al*. Ghost writers and honorary authorship: a survey from the Chinese Medical Journal [abstract]. *Sixth International Congress on Peer Review and Biomedical Publication; 2009 Sept 10-12; Vancouver, BC, Canada* 2009.
33. Hamilton CW, Jacobs A. Evidence of decreased ghostwriting in a series of three surveys of medical communicators conducted between 2005 and 2011. *AMWA J* 2012;**27**:115.
34. Elliott C. Pharma goes to the laundry: Public relations and the business of medical education. *Hastings Cent Rep* 2004;**34**:18-23.
35. Moffatt B, Elliott C. Ghost marketing: pharmaceutical companies and ghostwritten journal articles. *Perspect Biol Med* 2007;**50**:18-31.
36. Scheife RT. A ghost in the machine. *Pharmacotherapy* 2009;**29**:363-4.

- 1  
2  
3  
4  
5  
6  
7  
8  
9  
10  
11  
12  
13  
14  
15  
16  
17  
18  
19  
20  
21  
22  
23  
24  
25  
26  
27  
28  
29  
30  
31  
32  
33  
34  
35  
36  
37  
38  
39  
40  
41  
42  
43  
44  
45  
46  
47  
48  
49  
50  
51  
52  
53  
54  
55  
56  
57  
58  
59  
60
37. MacLennan A, Sturdee D, Fenton A, *et al*. Editorial: Ghost writers, vested interest and funding disclosures. *Climacteric* 2010;**13**:301-2.
38. Nahai F. Ghostwriting: Stringent disclosure policies take aim at authorship abuses. *Aesthet Surg J* 2010;**30**:265-6.
39. Ngai S, Gold JL, Gill SS, *et al*. Haunted manuscripts: ghost authorship in the medical literature. *Account Res* 2005;**12**:103-14.
40. Bosch X. Exorcising ghostwriting. Ghostwriting could potentially have serious repercussions for science and should therefore be treated as research misconduct. *EMBO Rep* 2011;**12**:489-94.
41. Wiwanitkit V. Ghostwriting: An existing problem. *Am J Med* 2012;**125**:e17.
42. Krinsky S. When conflict-of-interest is a factor in scientific misconduct. *Med Law* 2007;**26**:447-63.
43. Langdon-Neuner E. Medical ghost-writing. *Mens Sana Monogr* 2008;**6**:257-73.
44. Tharyan P. Evidence-based medicine: can the evidence be trusted? *Indian J Med Ethics* 2011;**8**:201-7.
45. Paul M. On transparency, responsibility, and accountability. *Clin Microbiol Infect* 2009;**15**:1100-2.
46. Bavdekar SB. Authorship issues. *Lung India* 2012;**29**:76-80.
47. Gorski A, Letkiewicz S. "Medical writing" and ghostwriting as ethical challenges in medical communication. *Transplant Proc* 2010;**42**:3335-7.
48. Matías-Guiu J, García-Ramos R. Ghost-authors, improvement article communication, and medical publications. *Neurologia* 2011;**26**:257-61.
49. McHenry L. Of sophists and spin-doctors: industry-sponsored ghostwriting and the crisis of academic medicine. *Mens Sana Monogr* 2010;**8**:129-45.
50. Healy DT. Transparency and trust: figure for ghost written articles was misquoted. *BMJ* 2004;**329**:1345.
51. Mitrany D. The ghostwriting controversy: Time for a proper burial. *Science Editor* 2005;**28**:187.

- 1  
2  
3  
4  
5  
6  
7  
8  
9  
10  
11  
12  
13  
14  
15  
16  
17  
18  
19  
20  
21  
22  
23  
24  
25  
26  
27  
28  
29  
30  
31  
32  
33  
34  
35  
36  
37  
38  
39  
40  
41  
42  
43  
44  
45  
46  
47  
48  
49  
50  
51  
52  
53  
54  
55  
56  
57  
58  
59  
60
52. Kmietowicz Z. Consumer organisations criticise influence of drug companies. *BMJ* 2004;**329**:937.
53. Bonita RE, Adams S, Whellan DJ. Reporting of clinical trials: publication, authorship, and trial registration. *Heart Fail Clin* 2011;**7**:561-7.
54. Anon. Ghostwriting in medical literature. *Int J Occup Environ Health* 2011;**17**:168-77.
55. Anon. High prevalence of ghost authorship in industry-initiated trials. *Nat Clin Pract Nephrol* 2007;**3**:240.
56. Baethge C. On ghost authorship and reviews: The 6th International Congress on Peer Review and Biomedical Publication. *Deutsches Arzteblatt* 2009;**106**:731-2.
57. Flanagan A. Research on authorship. What do we know about the prevalence of ghost authorship? *Council of Science Editors Annual Meeting, May 14-18, Atlanta, Georgia* 2010.
58. Murray S, Brophy J, Palepu A. Open Medicine's ghost and guest authorship policy. *Open Med* 2010;**4**:e11-2.
59. Moore N. Transparency and trust: Clear definition of ghost writing would be helpful. *BMJ* 2004;**329**:1345-6.
60. Hargreaves S. Industry funded trials often have ghost authorship. *BMJ* 2007;**334**:223.
61. Jones N. Ghosts still present in the medical machine. *Nature* 2009;**461**:325.
62. Williams M. An inquiry by the UK House of Commons Health Select Committee into the influence of the pharmaceutical industry (18 October). 2004.  
[http://www.meactionuk.org.uk/HoC\\_Select\\_Ctte\\_Inquiry\\_into\\_Pharma.htm](http://www.meactionuk.org.uk/HoC_Select_Ctte_Inquiry_into_Pharma.htm) (accessed 30 December 2013).
63. Marušić A, Bošnjak L, Jerončić A. A systematic review of research on the meaning, ethics and practices of authorship across scholarly disciplines. *PLoS One* 2011;**6**:e23477.
64. Bailey M. Science editing and its effect on manuscript acceptance time. *AMWA J* 2011;**26**:147-52.
65. Jacobs A. Adherence to the CONSORT guideline in papers written by professional medical writers. *Write Stuff* 2010;**19**:196-200.



- 1  
2  
3  
4  
5  
6  
7  
8  
9  
10  
11  
12  
13  
14  
15  
16  
17  
18  
19  
20  
21  
22  
23  
24  
25  
26  
27  
28  
29  
30  
31  
32  
33  
34  
35  
36  
37  
38  
39  
40  
41  
42  
43  
44  
45  
46  
47  
48  
49  
50  
51  
52  
53  
54  
55  
56  
57  
58  
59  
60
66. Woolley KL, Lew RA, Stretton S, *et al.* Lack of involvement of medical writers and the pharmaceutical industry in publications retracted for misconduct: a systematic, controlled, retrospective study. *Curr Med Res Opin* 2011;**27**:1175-82.
67. Flanagin A, Carey LA, Fontanarosa PB, *et al.* Prevalence of articles with honorary authors and ghost authors in peer-reviewed medical journals. *JAMA* 1998;**280**:222-4.
68. Wislar JS, Flanagin A, Fontanarosa PB, *et al.* Honorary and ghost authorship in high impact biomedical journals: a cross sectional survey. *BMJ* 2011;**343**:d6128.
69. Leo L, Lacasse J. Medical ghostwriting: A university sanctioned sleight of hand? *Society* 2012;**49**:310-2.
70. Malički M, Jerončić A, Marušić M, *et al.* Why do you think you should be the author on this manuscript? Analysis of open-ended responses of authors in a general medical journal. *BMC Med Res Methodol* 2012;**12**:189.
71. PLoS Med. Article metrics: Ghost authorship in industry-initiated randomised trials: PLoS Med, 2013.
72. Wager E, Field EA, Grossman L. Good publication practice for pharmaceutical companies. *Curr Med Res Opin* 2003;**19**:149-54.

**FIGURE LEGENDS**

**Figure 1. Selection of publications reporting a numerical estimate of the prevalence of ghostwriting.** Electronic databases were searched on 23 May 2013.

<sup>a</sup> Journal of the European Medical Writers Association, formerly known as The Write Stuff.

<sup>b</sup> Journal of the American Medical Writers Association.

<sup>c</sup> Council of Science Editors Annual Meetings.

<sup>d</sup> International Congress on Peer Review and Biomedical Publication.

**Figure 2. Case study of original versus cited evidence of ghostwriting prevalence.**

Contrast between original evidence on the prevalence of possible ghostwriting in sertraline publications from 1998 to 2000 and the subsequent citations of this evidence. Source of the original published evidence: Healy and Cattell[6] showed that 55 of 96 (57%) articles published on sertraline from 1998 to 2000 were coordinated through a medical communications company and concluded that these data provided information on the “possible extent of ghostwriting based on a single drug”. Inaccurate reporting from the cited source is marked with a cross.

**TITLE**

Systematic review on the primary and secondary reporting of the prevalence of ghostwriting  
in the medical literature

**AUTHOR**

Serina Stretton, PhD CMPP

**AUTHOR'S AFFILIATION**

ProScribe – ~~Envision Pharma Group~~ Medical Communications, ~~Neesaville,~~  
~~Queensland~~ Sydney, NSW, Australia

**AUTHOR FOR CORRESPONDENCE**

Serina Stretton, PhD, CMPP

ProScribe – ~~Envision Pharma Group~~ Medical Communications

18 Poulet St

Matraville, NSW, 2036

AUSTRALIA

Tel: + 612 9661 0768

Fax: + 612-7 ~~5474 9156~~ 9661-0766

Email: serina.stretton@EnvisionPharmaGroup.com ~~ss@proscribe.com.au~~

**KEYWORDS**

Authorship, ghostwriting, systematic review

**WORD COUNT**

3,967

## ABSTRACT

**Background:** Ghostwriting of industry-sponsored articles is unethical and is perceived to be common practice.

**Objective:** To systematically review how evidence for the prevalence of ghostwriting is reported in the medical literature.

**Data sources:** MEDLINE via PubMed 1966+, EMBASE 1966+, The Cochrane Library 1988+, Medical Writing 1998+, The AMWA Journal 1986+, Council of Science Editors Annual Meetings 2007+, and the Peer Review Congress 1994+ were searched electronically (23 May 2013) using the search terms ghostwrit\*, ghostauthor\*, ghost AND writ\*, ghost AND author\*.

**Eligibility criteria:** All publication types were considered; only publications reporting a numerical estimate of possible ghostwriting prevalence were included.

**Data extraction:** Two independent reviewers screened the publications; discrepancies were resolved by consensus. Data to be collected included a numerical estimate of the prevalence of possible ghostwriting (primary outcome measure), definitions of ghostwriting reported, source of the reported prevalence, publication type and year, study design, and sample population.

**Results:** Of the 848 publications retrieved and screened for eligibility, 48 reported numerical estimates for the prevalence of possible ghostwriting. Sixteen primary publications reported findings from cross-sectional surveys or descriptive analyses of published articles; 32 secondary publications cited published or unpublished evidence. Estimates on the prevalence of possible ghostwriting in primary and secondary publications varied markedly. Primary estimates were not suitable for meta-analysis because of the various definitions of ghostwriting used, study designs, and types of populations or samples. Secondary estimates were not always reported or cited correctly or appropriately.

**Conclusions:** Evidence for the prevalence of ghostwriting in the medical literature is limited and can be outdated, misleading, or mistaken. Researchers should not inflate estimates

1  
2  
3 using nonstandard definitions of ghostwriting nor conflate ghostwriting with other unethical  
4 authorship practices. Editors and peer reviewers should not accept articles that incorrectly  
5 cite or interpret primary publications that report the prevalence of ghostwriting.  
6  
7  
8  
9  
10  
11  
12  
13  
14  
15  
16  
17  
18  
19  
20  
21  
22  
23  
24  
25  
26  
27  
28  
29  
30  
31  
32  
33  
34  
35  
36  
37  
38  
39  
40  
41  
42  
43  
44  
45  
46  
47  
48  
49  
50  
51  
52  
53  
54  
55  
56  
57  
58  
59  
60

For peer review only

### Strengths

- First systematic review on the reporting of the prevalence of ghostwriting in the medical literature
- A broad search strategy was employed with few restrictions to minimize any potential for publication or language bias; there were no restrictions on language.
- All study designs and publication types were considered

### Limitations

- Study heterogeneity in the outcomes reported and populations investigated precluded synthesis of the data
- Retrospective and self-reported nature of the data collection increased the risk of selection bias in the studies
- Most included studies were not broadly representative of the peer-reviewed medical literature

## INTRODUCTION

Ghostwriting occurs when paid or unpaid writing contributions to a manuscript that do not meet authorship criteria are not disclosed in the acknowledgments.<sup>[1]</sup> This practice is considered to be distinct from ghost authoring, where contributions to a manuscript that do merit authorship are not disclosed in the author byline.<sup>[1]</sup> However, part of the challenge in understanding the prevalence of ghostwriting is the current confusion surrounding the two these unethical practices. For example, the widely used Council of Science Editors definition of ghost authors (ie, individuals who participate in research, data analysis, and/or writing of a manuscript but are not named or disclosed in the author byline or acknowledgments) does not distinguish between ghost authors and ghostwriters.<sup>[2]</sup>

Ghostwriting of peer-reviewed journal publications in the medical literature is believed to be common practice.<sup>[3-5]</sup> This belief is supported, to a large extent, by highly publicized cases, primarily from the 1990s and early 2000s, of pharmaceutical companies and authors who had used ghostwriters to prepare manuscripts for publication in medical journals.<sup>[6-8]</sup> Such cases are highly unethical because the role of the commercial sponsor and any other potential conflicts of interest were hidden.

~~Ghostwriting occurs when writing contributions to a manuscript that do not meet authorship criteria are not disclosed in the acknowledgments. This practice is distinct from ghost authoring, where contributions to a manuscript that do merit authorship are not disclosed in the author byline.<sup>[7]</sup> However, part of the challenge in understanding the prevalence of ghostwriting is the current confusion surrounding the two unethical practices. For example, the widely used Council of Science Editors definition of ghost authors (ie, individuals who participate in research, data analysis, and/or writing of a manuscript but are not named or disclosed in the author byline or acknowledgments) does not distinguish between ghost authors and ghostwriters.<sup>[8]</sup> Estimating the prevalence of ghostwriting in the medical~~

1  
2  
3 literature has ~~also~~ been hindered not only by the different definitions of ghostwriting and  
4 ghost authoring, but also by the failure of authors to distinguish ghostwriting, which is  
5 unethical, from professional medical writing support, which is ethical.[9, 10] Ghostwriters  
6 keep their involvement in a manuscript hidden, whereas professional medical writers  
7 disclose their involvement and follow ethical publication practices.[1, 9-11] Consistent with  
8 the authorship criteria recommended by the International Committee of Medical Journal  
9 Editors (ICMJE), professional medical writers who provide writing assistance and do not  
10 meet all of the ICMJE authorship criteria, should be acknowledged rather than listed as  
11 authors. [12] The prevalence of disclosed professional medical writing assistance in medical  
12 journals has been estimated to be between 6.0% and 11.0% [10, 13] and the legitimate value  
13 that this medical writing assistance can bring to improving the quality, timeliness, and  
14 integrity of reporting in medical journals has been demonstrated. [1, 14, 15] However, the  
15 exact prevalence of ghostwriting and other forms of undisclosed contributions to papers  
16 published in medical journals is unknown.

17  
18  
19  
20  
21  
22  
23  
24  
25  
26  
27  
28  
29  
30  
31  
32  
33 The primary objective of this study was to conduct the first systematic review on how the  
34 prevalence of ghostwriting is reported in the medical literature. The secondary objectives  
35 were to assess the variability of the reported estimates of the prevalence of ghostwriting and  
36 investigate the source for these estimates.  
37  
38  
39  
40  
41  
42  
43  
44  
45  
46  
47  
48  
49  
50  
51  
52  
53  
54  
55  
56  
57  
58  
59  
60



## MATERIALS AND METHODS

### Literature search strategy

A search strategy was developed to retrieve publications from the medical literature that reported quantitative estimates of the prevalence of ghostwriting. The following databases were searched on 23 May 2013: MEDLINE via PubMed (1966+); EMBASE (1966+); The Cochrane Library, including the Cochrane Database of Systematic Reviews and Cochrane Central Register of Controlled Trials (1988+); The AMWA Journal (1986+, journal of the American Medical Writers Association); Medical Writing (1998+, journal of the European Medical Writers Association, formerly known as The Write Stuff); Council of Science Editors annual meetings (2007+); and the International Congress on Peer Review and Biomedical Publication meetings (1994+). General text was searched using the following search terms: ghostwrit\*, ghostauthor\*, ghost AND writ\*, ghost AND author\*. Truncation symbols and Boolean operators (AND, OR) were used wherever possible.

Two reviewers (SS, SMG) independently screened the title and abstracts of all retrieved publications using prespecified eligibility criteria; the full text of potentially eligible publications was screened to confirm eligibility for inclusion. Any discrepancies between the reviewers were resolved by consensus. The reference lists of relevant reviews and other publications were screened by hand to identify any additional publications for inclusion.

### Eligibility criteria

The eligibility criteria were prespecified. Publications were included if they reported a numerical estimate of the prevalence of possible ghostwriting. Publications were excluded if they were duplicate publications from different databases or abstracts of subsequently published full-text articles, did not report any outcomes related to ghostwriting, or reported qualitative estimate(s) of the prevalence of possible ghostwriting. No restrictions on language were included in the eligibility criteria. If needed, the abstracts of publications

1  
2  
3 written in non-English language were to be translated to assist in screening for eligibility. If  
4 publications were eligible for inclusion, the full text of the publications were to be translated  
5 to English.  
6  
7  
8  
9

## 10 **Data extraction and analysis**

11 The primary and secondary outcomes and data to be collected were prespecified. Data to  
12 be collected and included publication type and year, study design and sample population,  
13 definitions of ghostwriting reported, reported prevalence of possible ghostwriting, and the  
14 source of the reported prevalence of ghostwriting. The prevalence of possible ghostwriting  
15 was reported as published. No unpublished data from the retrieved literature were reported  
16 and values for prevalence were not extrapolated from published data.  
17  
18  
19  
20  
21  
22  
23  
24  
25  
26

27 The primary outcome measure for the systematic review was a numerical estimate of the  
28 prevalence of possible ghostwriting. The reported definitions of possible ghostwriting were  
29 categorized according to the following standard definitions, irrespective of the term used to  
30 describe the practice in the publication. Undisclosed writing contributions to a manuscript  
31 were defined as (i) ghostwriting if they were described as not meriting authorship and were  
32 not listed in the acknowledgments[9, 16] and (ii) ghost authoring if they did merit authorship  
33 and were not listed in the author byline.[1] Consistent with recommendations from  
34 international medical journal editors,[12, 14] Good Publication Practice guidelines,[11] and  
35 professional medical writing associations,[17, 18] disclosed writing contributions to a  
36 manuscript that did not merit authorship and were disclosed in the acknowledgments were  
37 not categorized as ghostwriting.  
38  
39  
40  
41  
42  
43  
44  
45  
46  
47  
48  
49

50  
51 The key factors considered when assessing study quality were study design, the population  
52 assessed, and how ghostwriting was defined. While there is no consensus on the best  
53 practice for reporting survey research,[19] the quality of the cross-sectional surveys was  
54  
55  
56  
57  
58  
59  
60

1  
2  
3 determined by an assessment of the following factors: validation or pretesting of the survey  
4 questions, anonymity of the response, sample size, and response rate.  
5  
6  
7  
8  
9  
10  
11  
12  
13  
14  
15  
16  
17  
18  
19  
20  
21  
22  
23  
24  
25  
26  
27  
28  
29  
30  
31  
32  
33  
34  
35  
36  
37  
38  
39  
40  
41  
42  
43  
44  
45  
46  
47  
48  
49  
50  
51  
52  
53  
54  
55  
56  
57  
58  
59  
60

For peer review only

## RESULTS

### Publication selection

A total of 848 articles were retrieved from the literature search, 800 were excluded, and 48 met the eligibility criteria and were included in the systematic review (Figure 1). The main reasons for exclusion were publications not relevant to ghostwriting (n = 539), duplicate publications from different databases (n = 129), and publications not reporting a numerical estimate of the prevalence of possible ghostwriting (n = 124). The titles or abstracts of the 8 publications that were excluded because the full text or abstract could not be retrieved were reviewed; none were considered to report a numerical estimate of the prevalence of possible ghostwriting. Overall, eligible publications included 16 primary publications that reported original research on the prevalence of possible ghostwriting and 32 secondary publications that cited published or unpublished evidence of possible ghostwriting.

### Primary publications

#### Publication characteristics

Of the 16 primary publications (Table 1), there were 13 full-text publications[6, 8, 20-30] and three conference abstracts[31-33] that reported a numerical estimate of possible ghostwriting. Twelve publications[20-28, 31-33] reported findings from cross-sectional surveys and four publications[6, 8, 29, 30] reported findings from descriptive analyses of published articles. ~~While there is no consensus on the best practice for reporting survey research,[33]M~~ most cross-sectional surveys were reasonably well reported. The surveys used were not validated but most included pretested questions, required an anonymous response, were conducted in targeted populations (ie, all individuals invited to participate were involved in the preparation of peer-reviewed manuscripts), and reported a sample size and response rate. Of the cross-sectional surveys conducted in targeted populations (eg, corresponding or first authors), six had response rates greater than 50%, two had response rates less than 50%, and one did not report a

1  
2  
3  
4  
5  
6  
7  
8  
9  
10  
11  
12  
13  
14  
15  
16  
17  
18  
19  
20  
21  
22  
23  
24  
25  
26  
27  
28  
29  
30  
31  
32  
33  
34  
35  
36  
37  
38  
39  
40  
41  
42  
43  
44  
45  
46  
47  
48  
49  
50  
51  
52  
53  
54  
55  
56  
57  
58  
59  
60

|

For peer review only

response rate (Table 1). Of the cross-sectional surveys conducted in nontargeted populations (eg, individuals invited to participate who may or may not have been involved in providing medical writing assistance for peer-reviewed publications), three had low (12% to 28%) response rates and one did not report a response rate (Table 1).

**Table 1.** Characteristics of Primary Publications Reporting Original Evidence of Ghostwriting

| Publication                                                              | Population                               | Survey description                                        | Data collected    | N   | RR  |
|--------------------------------------------------------------------------|------------------------------------------|-----------------------------------------------------------|-------------------|-----|-----|
| <b><i>Cross-sectional surveys – authors or corresponding authors</i></b> |                                          |                                                           |                   |     |     |
| Flanagin 1998[27]                                                        | 6 general medicine journals <sup>a</sup> | Self-administered, postal, anonymous, pretested, targeted | 1996              | 809 | 69% |
| Mowatt 2002[23]                                                          | Published Cochrane reviews               | Self-administered, online, anonymous, pretested, targeted | 1999              | 362 | 63% |
| Hao 2009[32] (Abstract)                                                  | Chin Med J                               | Self-administered, email, not anonymous, targeted         | 2008 <sup>c</sup> | 220 | 86% |
| Dotson 2011[28]                                                          | 3 pharmacy journals                      | Self-administered, online, anonymous, pretested, targeted | 2009              | 112 | 25% |
| Mirzazadeh 2011[24]                                                      | 3 Iranian journals                       | Self-administered, email, not anonymous, targeted         | 2009-2010         | NR  | NR  |
| Wislar 2011[20]                                                          | 6 general medicine journals <sup>b</sup> | Self-administered, online, anonymous, pretested, targeted | 2008              | 622 | 70% |
| Ghajarzadeh 2012[26]                                                     | Arch Iran Med (based on student theses)  | Self-administered, email, anonymous, targeted             | 2005-2007         | 30  | 49% |
| Vinther 2012[21]                                                         | Ugeskr Laeger & Dan Med J                | Self-administered, online, anonymous, pretested, targeted | 2010              | 272 | 62% |
| <b><i>Cross-sectional surveys – healthcare professionals</i></b>         |                                          |                                                           |                   |     |     |
| Price 2000[22]                                                           | Health academic staff                    | Self-administered, postal, anonymous, pretested, targeted | NR                | 166 | 59% |
| Rees 2013[31]                                                            | Registered users of                      | Self-administered, online,                                | NR                | 295 | NR  |

|                                                                                 |                                                          |                                                 |               |     |                  |
|---------------------------------------------------------------------------------|----------------------------------------------------------|-------------------------------------------------|---------------|-----|------------------|
| (Abstract)                                                                      | EPG Online                                               | anonymous, nontargeted                          |               |     |                  |
| <b><i>Cross-sectional surveys – members of medical writing associations</i></b> |                                                          |                                                 |               |     |                  |
| Jacobs                                                                          | EMWA / AMWA                                              | Self-administered, online,                      | 2005          | 843 | 28%              |
| 2009[25]                                                                        | members                                                  | anonymous, pretested,<br>nontargeted            | 2008          | 773 | 14%              |
| Hamilton                                                                        | EMWA / AMWA                                              | Self-administered, online,                      | 2011          | 620 | 12% <sup>d</sup> |
| 2012[33]                                                                        | members                                                  | anonymous, pretested,<br>(Abstract) nontargeted |               |     |                  |
| <b><i>Publication reviews and descriptive analysis</i></b>                      |                                                          |                                                 |               |     |                  |
| Healy 2003[6]                                                                   | Articles on sertraline                                   | NA                                              | 1998-<br>2000 | 96  | NA               |
| Gøtzsche                                                                        | Articles on Danish                                       | NA                                              | NR            | 44  | NA               |
| 2007[30]                                                                        | industry-initiated trials<br>approved 1994-1995          |                                                 |               |     |                  |
| Ross 2008[8]                                                                    | Reviews on rofecoxib<br>associated with Merck<br>support | NA                                              | 1996-<br>2004 | 72  | NA               |
| Suda 2011[29]                                                                   | Noninferiority clinical<br>trials                        | NA                                              | 1989-<br>2009 | 583 | NA               |

<sup>a</sup> Annals of Internal Medicine, JAMA, the New England Journal of Medicine, American Journal of Cardiology, American Journal of Medicine, American Journal of Obstetrics and Gynecology.

<sup>b</sup> Annals of Internal Medicine, JAMA, the New England Journal of Medicine, Lancet, Nature Medicine, PLoS Medicine.

<sup>c</sup> Submission date.

<sup>d</sup> Personal communication, C. Hamilton.

Abbreviations: AMWA, American Medical Writers Association; EMWA, European Medical Writers Association; NA, not applicable; NR, not reported; RR, response rate.

1  
2  
3 Not all cross-sectional surveys were broadly representative of the peer-reviewed medical  
4 literature. The cross-sectional surveys were conducted in single populations of academic  
5 staff or healthcare professionals[22, 31], members of medical writing associations[25, 33], or  
6  
7 corresponding or first authors. The corresponding or first authors were surveyed from single  
8  
9 journals (Cochrane reviews, Chinese Medical Journal, Archives of Iranian Medicine),[23, 26,  
10  
11 32] two Danish journals,[21] three Iranian journals,[24] and three pharmacy journals.[28] Two  
12  
13 cross-sectional surveys of corresponding authors were conducted in six general medicine  
14  
15 journals.[20, 27]  
16  
17  
18  
19  
20

21 The descriptive analyses of published articles were conducted in single populations and  
22  
23 included an analysis of sertraline publications from 1998 to 2000,[6] rofecoxib reviews from  
24  
25 1996 to 2004,[8] publications from industry-initiated trials in Denmark from 1994 to 1995,[30]  
26  
27 and from published noninferiority trials from 1989 to 2009.[29]  
28  
29  
30

### 31 Reported prevalence of ghostwriting

32  
33 The reported prevalence of possible ghostwriting in the primary publications varied markedly  
34  
35 ~~and were not suitable for meta-analysis and was difficult to compare~~ because of the different  
36  
37 populations assessed, the different methods used to generate the estimates, and the various  
38  
39 definitions that were used (Tables 1 and 2). All cross-sectional surveys reported a definition  
40  
41 of ghostwriting or ghost authoring, but most definitions did not differentiate contributions that  
42  
43 merited authorship from those that did not merit authorship (Table 2).  
44  
45  
46  
47  
48  
49  
50  
51  
52  
53  
54  
55  
56  
57  
58  
59  
60



**Table 2.** Primary Publications Reporting Estimates of the Prevalence of Possible Ghostwriting

| Publication                                                                               | <u>Measure of Possible Ghostwriting Reported</u><br><u>measure by</u><br><u>Authors</u>                                                                                          | Estimate % (n)                                                                                             |
|-------------------------------------------------------------------------------------------|----------------------------------------------------------------------------------------------------------------------------------------------------------------------------------|------------------------------------------------------------------------------------------------------------|
| <b><i>Cross-sectional surveys reporting ghostwriting</i></b>                              |                                                                                                                                                                                  |                                                                                                            |
| Flanagin 1998[27]                                                                         | Unnamed individual who participated in the writing                                                                                                                               | 1.4% (11/809) of articles                                                                                  |
| Wislar 2011[20]                                                                           | Unnamed individual who participated in the writing                                                                                                                               | 0.2% <sup>a</sup> (1/622) of articles                                                                      |
| Jacobs 2009,<br>Hamilton 2012[25,<br>33]                                                  | Undisclosed medical writing assistance not qualifying for authorship                                                                                                             | 2005: 61.8% (NR)<br>2009: 41.7% (NR)<br>2011: 33.0% (NR)<br>of <u>writers</u> <u>articles</u> <sup>b</sup> |
| <b><i>Cross-sectional surveys reporting combined ghost authoring and ghostwriting</i></b> |                                                                                                                                                                                  |                                                                                                            |
| Flanagin 1998[27]                                                                         | Failure to name, as an author, individuals who made substantial contributions to the research or writing or an unidentified medical writer                                       | 11.5% (93/809) of articles                                                                                 |
| Price 2000[22]                                                                            | Failure to name, as an author, individuals who made substantial contributions to the research or writing                                                                         | 24.1% (40/166) of authors                                                                                  |
| Mowatt 2002[23]                                                                           | Individual merited authorship or had assisted with drafting but not listed as an author or acknowledged                                                                          | 8.8% (32/362) of articles                                                                                  |
| Hao 2009[32]                                                                              | English-language speakers assisted with writing but not identified as authors or acknowledged                                                                                    | 10.4% (NR) of authors                                                                                      |
| Dotson 2011[28]                                                                           | Failure to name, as an author, individuals who made substantial contributions to the research or writing                                                                         | 0.9% (1/112) of articles                                                                                   |
| Wislar 2011[20]                                                                           | Failure to name, as an author, individuals who made substantial contributions to the research or writing of the article or an unnamed individual who participated in the writing | 7.9% (49/622) of articles                                                                                  |
| <b><i>Cross-sectional surveys reporting ghost authoring</i></b>                           |                                                                                                                                                                                  |                                                                                                            |
| Mirzazadeh<br>2011[24]                                                                    | Failure to name, as an author, individuals who made substantial contributions to the research                                                                                    | 21.4% (25/NR) of authors                                                                                   |

|                  |                                                                                                         |                                   |
|------------------|---------------------------------------------------------------------------------------------------------|-----------------------------------|
| Ghajarzadeh      | Failure to name, as an author, students who made substantial contributions to the research <sup>c</sup> | 0.7% (2/296) of articles          |
| Vinther 2012[21] | Individual merited authorship but not listed as an author                                               | 2.4% (6/245) of articles          |
| Rees 2013[31]    | Individual merited authorship but not listed as an author                                               | 70% (NR/202) of published authors |

---

**Publication reviews and descriptive analysis reporting possible ghost authoring or ghostwriting**

|                   |                                                                                                                                                                                                                                 |                           |
|-------------------|---------------------------------------------------------------------------------------------------------------------------------------------------------------------------------------------------------------------------------|---------------------------|
| Healy 2003[6]     | Published articles coordinated by a medical information company, including acknowledged medical writing support <sup>de</sup>                                                                                                   | 57.3% (55/96) of articles |
| Gøtzsche 2007[30] | Individuals who wrote the trial protocol, conducted the statistical analyses, or wrote the manuscript but were not listed as authors, not members of a study group or steering committee, or not disclosed in an acknowledgment | 75.0% (33/44) of trials   |
| Ross 2008[8]      | Published reviews associated with Merck support and with a single external author <sup>ed</sup>                                                                                                                                 | 69.4% (50/72) of reviews  |

---

<sup>a</sup> Available as online supplementary data.

<sup>b</sup> Values represent the mean weighted percentage of publications that were ghostwritten by respondents. Findings were weighted in proportion to the number of manuscripts the respondent wrote per year.

<sup>b, c</sup> Students were classified as ghostwriters if the student was not named as an author and if the results reported in the publications were based on the results of their theses.

<sup>e, d</sup> Authors conclude data provide quantification of the possible extent of ghostwriting based on a single drug. Of the 55 published articles that were coordinated through a medical information company, 2 included medical writing assistance that was acknowledged in the published article.

<sup>d, e</sup> Published review articles had been identified from correspondence between Merck and a medical publishing company, from Merck publication status reports, or were affiliated with an author named within the correspondence or publication status reports. The authors did not report whether medical writing assistance was acknowledged in the published article.

Abbreviations: NR, not reported.

1  
2  
3 Four cross-sectional surveys reported the prevalence of ghostwriting where the definition  
4 provided could be categorized as undisclosed contributions that do not merit authorship.[20,  
5 25, 27, 33] Findings from these surveys, which were repeated at different time points,  
6 suggested that the prevalence of ghostwriting is low and decreasing. Flanagin[27] and  
7 Wislar[20] conducted two similar cross-sectional surveys of corresponding authors of articles  
8 published in six general medicine journals in 1996[27] and in 2008.[20] The surveys, which  
9 included a core set of three journals (Annals of Internal Medicine, JAMA, the New England  
10 Journal of Medicine) at each time point and in targeted populations, used pretested  
11 questions that required an anonymous response and had response rates greater than 65%.  
12 The prevalence of ghost authoring (which included ghostwriting) was estimated to be 11.5%  
13 in 1996 and 7.9% in 2008. The prevalence of ghostwriting from these surveys was estimated  
14 to be 1.4% in 1996 and 0.2% in 2008. Hamilton and Jacobs conducted a cross-sectional  
15 survey of members of two medical writing associations in 2005, 2008, and 2011.[25, 33] The  
16 survey, which was not conducted in targeted populations, used pretested questions that  
17 required an anonymous response and had response rates from 12% to 28% of the total  
18 population surveyed (ie, not all participants surveyed were involved in the preparation of  
19 peer-reviewed manuscripts). Findings from these surveys showed that the mean weighted  
20 percentage of publications that were association members who contributed to peer-reviewed  
21 publications and had ghostwritten by respondents at least once during the survey year had  
22 decreased from 61.8% in 2005 to 33.0% in 2011. Findings were weighted in proportion to  
23 the number of manuscripts the respondent wrote per year.  
24  
25  
26  
27  
28  
29  
30  
31  
32  
33  
34  
35  
36  
37  
38  
39  
40  
41  
42  
43  
44  
45  
46  
47  
48  
49  
50  
51  
52  
53  
54  
55  
56  
57  
58  
59  
60

Six cross-sectional survey publications reported the prevalence of possible ghostwriting (ie, the prevalence of ghostwriting and ghost authoring combined).[20, 22, 23, 27, 28, 32] The prevalence of possible ghostwriting reported in these cross-sectional surveys varied from 0.9% to 24.1% of publications or authors.

1  
2  
3 Four cross-sectional survey publications reported the prevalence of ghost authoring.[21, 24,  
4 26, 31] The prevalence of ghost authoring reported in these cross-sectional surveys varied  
5 from 0.7% to 70% of publications or authors.  
6  
7  
8

9  
10  
11 The descriptive analyses of published articles on sertraline and rofecoxib did not include a  
12 prespecified definition of ghost authoring or ghostwriting;[6, 8] in these studies, possible  
13 ghostwriting or ghost authoring was assumed in publications associated with industry-  
14 sponsored support (Table 2). The descriptive analysis of industry-initiated trials in Denmark  
15 used a nonstandard definition of ghost authors; in this study ghost authors were defined as  
16 individuals, not named as authors, who were involved in writing the protocol, conducting the  
17 statistical analyses, or writing the manuscript.[30] The prevalence of possible ghostwriting in  
18 the two descriptive analyses of single drugs that did not include a prespecified definition of  
19 ghostwriting was 57% of articles on sertraline published from 1998 to 2000[6] and 69% of  
20 reviews on rofecoxib published from 1996 to 2004.[8] The prevalence of possible  
21 ghostwriting in the descriptive analysis of Danish industry-initiated trials, which used a  
22 nonstandard definition of authorship, was 75% of Danish initiated trials approved in 1994 to  
23 1995.[30] The descriptive analysis of noninferiority trials[29] was not considered further as  
24 the definition of ghostwriting used was consistent with disclosed medical writing assistance.  
25 In this study ghostwriters were defined as acknowledged individuals, other than authors, who  
26 contributed to the writing and were affiliated with an industry-sponsored study.[29] The  
27 prevalence of disclosed medical writing assistance in this descriptive analysis was 17.3%  
28 (101/583) of clinical trials.  
29  
30  
31  
32  
33  
34  
35  
36  
37  
38  
39  
40  
41  
42  
43  
44  
45  
46  
47  
48  
49

## 50 **Secondary publications**

### 51 Publication characteristics

52  
53 Of the 32 secondary publications, there were 13 review articles, 10 editorials, 5  
54 commentaries, 3 news articles, and 1 government report, with most being published after  
55 2008 (Table 3). Most publications cited primary sources as evidence of the prevalence of  
56  
57  
58  
59  
60

possible ghostwriting (Table 3), with the cited prevalence of possible ghostwriting varying from 6% of publications to 100% of publications involving drugs. In most secondary publications, the information on the prevalence of ghostwriting was not reported consistently compared with the cited evidence (Table 3). Misleading and mistaken information was reported in many publications that (i) did not distinguish between ghostwriting and ghost authoring, (ii) included acknowledged medical writing assistance or a combined estimate of guest authorship and ghost authorship as ghostwriting, (iii) generalized findings from publication reviews and analyses of specific datasets to wider populations of publications or industry-sponsored trials, or (iv) cited personal communications or informal surveys where the original source was unpublished and could not be verified (Table 3).

**Table 3.** Characteristics of Secondary Publications Citing Evidence of Possible Ghostwriting

| Publication                              | Cited evidence      | Consistent with cited source(s) | Comment                                                                     |
|------------------------------------------|---------------------|---------------------------------|-----------------------------------------------------------------------------|
| Elliot Hastings Cent Rep 2004[34]        | Primary             | No                              | Did not distinguish GW from GA                                              |
| Moffat Perspect Biol Med 2007[35]        | Primary             | No                              | Did not distinguish GW from GA                                              |
| Schiefe Pharmacotherapy 2009[36]         | Primary             | No                              | Did not distinguish GW from GA                                              |
| MacLennan Climacteric 2010[37]           | Primary             | No                              | Did not distinguish GW from GA                                              |
| Nahai Aesthet Surg J 2010[38]            | Secondary           | No                              | Did not distinguish GW from GA                                              |
| Ngai Account Res 2005[39]                | Primary             | Yes                             | Did not distinguish GW from GA                                              |
| Bosch EMBO Rep 2011[40]                  | Primary             | Yes                             | Did not distinguish GW from GA                                              |
| Wiwantkit Am J Med 2012[41]              | Primary             | No                              | Did not distinguish GW from GA or GA from guest authorship                  |
| Krimsky Med Law 2007[42]                 | Primary             | No                              | Did not distinguish GW from GA or GA from guest authorship                  |
| Langdon-Neuner Mens Sana Monogr 2008[43] | Primary & secondary | No                              | Did not distinguish GW from GA or GW from disclosed medical writing support |

|    |                                      |             |         |                                 |
|----|--------------------------------------|-------------|---------|---------------------------------|
| 1  |                                      |             |         |                                 |
| 2  |                                      |             |         |                                 |
| 3  | Tharyan Indian J Med Ethics 2011[44] | Primary     | Yes     | Did not distinguish GW from GA  |
| 4  |                                      |             |         | or GW from disclosed medical    |
| 5  |                                      |             |         | writing assistance              |
| 6  |                                      |             |         |                                 |
| 7  |                                      |             |         |                                 |
| 8  | Paul Clin Microbiol Infect 2009[45]  | Primary     | Yes     | Did not distinguish GW / GA     |
| 9  |                                      |             |         | from disclosed medical writing  |
| 10 |                                      |             |         | assistance                      |
| 11 |                                      |             |         |                                 |
| 12 |                                      |             |         |                                 |
| 13 | Bavdekar Lung India 2012[46]         | Primary     | No      | Did not distinguish GW from GA  |
| 14 |                                      |             |         | and generalized evidence to a   |
| 15 |                                      |             |         | wider population                |
| 16 |                                      |             |         |                                 |
| 17 |                                      |             |         |                                 |
| 18 | Górski Transplant Proc 2010[47]      | Primary &   | No      | Did not distinguish GW from GA  |
| 19 |                                      | secondary   |         | and generalized evidence to a   |
| 20 |                                      |             |         | wider population                |
| 21 |                                      |             |         |                                 |
| 22 |                                      |             |         |                                 |
| 23 | Matias-Guiu Neurologia 2011[48]      | Primary &   | No      | Did not distinguish GW from GA  |
| 24 |                                      | secondary   |         | and generalized evidence to a   |
| 25 |                                      |             |         | wider population                |
| 26 |                                      |             |         |                                 |
| 27 |                                      |             |         |                                 |
| 28 | McHenry Mens Sana Monogr 2010[49]    | Gov. report | No      | Generalized evidence to a wider |
| 29 |                                      |             |         | population                      |
| 30 |                                      |             |         |                                 |
| 31 |                                      |             |         |                                 |
| 32 |                                      |             |         |                                 |
| 33 | Healy BMJ 2004[50]                   | Primary &   | No / ND | Generalized evidence to a wider |
| 34 |                                      | secondary   |         | population and reported         |
| 35 |                                      |             |         | personal opinion of GW          |
| 36 |                                      |             |         | prevalence                      |
| 37 |                                      |             |         |                                 |
| 38 |                                      |             |         |                                 |
| 39 |                                      |             |         |                                 |
| 40 |                                      |             |         |                                 |
| 41 | Abbasi BMJ 2004[4]                   | Secondary   | No      | Secondary publication cited     |
| 42 |                                      |             |         | named individual                |
| 43 |                                      |             |         |                                 |
| 44 |                                      |             |         |                                 |
| 45 | Mitrany Science Editor 2005[51]      | None        | ND      | Cited named individual          |
| 46 |                                      |             |         |                                 |
| 47 | Collier Can Med Assoc J 2009[5]      | None        | ND      | Cited named individual          |
| 48 |                                      |             |         |                                 |
| 49 | Kmietowicz BMJ 2004[52]              | None        | ND      | Cited named individual          |
| 50 |                                      |             |         |                                 |
| 51 | Matthews Wall St J 2005[3]           | None        | ND      | Cited unpublished data          |
| 52 |                                      |             |         |                                 |
| 53 | Bonita Heart Fail Clin 2011[53]      | Primary     | Yes     | Consistent with cited source    |
| 54 |                                      |             |         |                                 |
| 55 | Grassley Int J Occup Environ Health  | Primary     | Yes     | Consistent with cited source    |
| 56 | 2011[54]                             |             |         |                                 |
| 57 |                                      |             |         |                                 |
| 58 |                                      |             |         |                                 |
| 59 |                                      |             |         |                                 |
| 60 |                                      |             |         |                                 |

|                                       |           |     |                              |
|---------------------------------------|-----------|-----|------------------------------|
| Nat Clin Pract Nephrol 2007[55]       | Primary   | Yes | Consistent with cited source |
| Editors J Urol 2008[15]               | Primary   | Yes | Consistent with cited source |
| Baethge Deutsches Arzteblatt 2009[56] | Primary   | Yes | Consistent with cited source |
| Flanagin CSE Annual Mtg 2010[57]      | Primary   | Yes | Consistent with cited source |
| Murray Open Med 2010[58]              | Primary   | Yes | Consistent with cited source |
| Moore BMJ 2004[59]                    | Secondary | Yes | Consistent with cited source |
| Hargreaves BMJ 2007[60]               | Primary   | Yes | Consistent with cited source |
| Jones Nature 2009[61]                 | Primary   | Yes | Consistent with cited source |

---

Abbreviations: CSE, Council of Science Editors; GA, ghost authoring; Gov, government; GW, ghostwriting; ND, not determined.

#### Case study of misleading and mistaken evidence

An analysis of secondary publications citing the possible prevalence of ghostwriting in sertraline publications provides an illuminating case study on how misleading or mistaken evidence can enter and remain in the medical literature. In 2003, Healy and Cattell showed that 57% (55/96) of articles on sertraline published from 1998 to 2000 were coordinated through a medical information company and only two acknowledged medical writing assistance.[6] The authors concluded that these data provided information on the “possible extent of ghostwriting based on a single drug”. In 2004 (October 14), Healy also provided evidence on the influence of the pharmaceutical industry on key groups at a United Kingdom House of Commons Health Select Committee investigation.[62] In answer to Question 197, Healy stated the following:

*“My estimate is that, even in journals like the BMJ, the Lancet, the New England Journal of Medicine and JAMA, the leading journals in the field, if these articles have to do with therapeutics, with drugs, it may be worse perhaps for psychiatry than elsewhere, but I doubt it, 50% of these articles are ghostwritten. It may be higher.”*

1  
2  
3 Healy and Cattell's original evidence has been cited incorrectly and interchangeably with  
4 Healy's statement to the House of Commons Health Select Committee investigation (Figure  
5 2). Although findings from the primary publication have been cited and interpreted correctly in  
6  
7 two secondary publications,[34, 35] many secondary publications incorrectly cited Healy's  
8  
9 original evidence and statement to the House of Commons Health Select Committee  
10  
11 investigation (Figure 2).  
12  
13  
14  
15  
16  
17  
18  
19  
20  
21  
22  
23  
24  
25  
26  
27  
28  
29  
30  
31  
32  
33  
34  
35  
36  
37  
38  
39  
40  
41  
42  
43  
44  
45  
46  
47  
48  
49  
50  
51  
52  
53  
54  
55  
56  
57  
58  
59  
60



## DISCUSSION

This systematic review on the reported prevalence of ghostwriting in the medical literature showed that the estimates of the prevalence of ghostwriting in primary publications varied markedly and were influenced by the definitions used, the types of study designs, and the type of population or samples assessed. In addition, secondary publications often cited outdated, misleading, or mistaken evidence of the reported prevalence of ghostwriting, with many publications not distinguishing ghostwriting from ghost authoring.

Although evidence from descriptive analyses can highlight the extent of ghostwriting in single populations, evidence from well-conducted cross-sectional surveys have the potential to provide estimates of the prevalence of ghostwriting that may be generalized to the majority of peer-reviewed publications. Despite this, many of the cross-sectional surveys retrieved in this systematic review were conducted in limited populations that were not broadly representative of the peer-reviewed medical literature. In addition, many of the cross-sectional surveys did not differentiate between contributions that merited authorship from those that did not merit authorship and provided at best, an estimate of possible ghostwriting. The reported prevalence of ghostwriting, where ghostwriting was defined as undisclosed contributions that did not merit authorship, was retrieved from the two cross-sectional surveys of corresponding authors from several general medicine journals and by cross-sectional surveys (repeated on three separate occasions from 2005 to 2011) of members of two major medical writing associations. Together the findings from these surveys suggested that the prevalence of ghostwriting has decreased in recent years. However, while the findings from these surveys may be considered more broadly representative of the peer-reviewed medical literature than surveys focused on single journals, single countries, or single subject areas, interpretation of these findings should take into account that respondents were required to retrospectively self-report potentially unethical or unprofessional behaviour.

1  
2  
3  
4  
5 Unethical authorship practices are a major concern and are an increasingly recognized  
6  
7 problem in the medical literature.[63] As the findings from this systematic review suggest,  
8  
9 some of these perceived problems may arise from the considerable, but unnecessary,  
10  
11 confusion and disagreement surrounding the definitions of ghostwriting. As recognized by  
12  
13 the World Association of Medical Editors, professional medical writers can have a legitimate  
14  
15 role in assisting authors to communicate their research findings in the peer-reviewed  
16  
17 literature.[14] Professional medical writers can and do improve the timeliness and quality of  
18  
19 reporting and can assist investigators and industry sponsors to meet their ethical  
20  
21 commitments to the disclosure and publishing of clinical trial results.[1, 64-66] As such, the  
22  
23 misleading and mistaken reporting of the prevalence of ghostwriting that was evident in the  
24  
25 secondary publications retrieved in this systematic review is disappointing. Specifically, the  
26  
27 confusion surrounding definitions of ghost authorship and ghostwriting and the unbalanced  
28  
29 focus on industry as the source of unethical authorship practices in the secondary  
30  
31 publications takes attention away from the need to focus on all types of unethical  
32  
33 contributions in peer-reviewed publications, irrespective of the source of the unethical  
34  
35 practice.  
36  
37  
38  
39  
40  
41  
42  
43  
44  
45  
46  
47  
48  
49  
50  
51  
52  
53  
54  
55  
56  
57  
58  
59  
60

The various definitions of ghostwriting and ghost authoring found in this systematic review highlights the considerable disagreement in the medical literature with regard to the definitions of ghostwriting and ghost authoring and whether a distinction should be made between these unethical practices. Although the Council of Science Editors uses a straightforward and broad definition of ghost authors that does not distinguish between ghost authors and ghostwriters.[2] the distinction between ghost authorship and ghostwriting used in this manuscript is consistent with those used in the cross-sectional surveys conducted by Flanagan[67] and Wislar[68] and with the authorship criteria recommended by the ICMJE.[12] Distinguishing between these practices is important because it differentiates between undisclosed contributions that do and do not merit authorship. However, part of the reason

1  
2  
3 for the disagreement about definitions of ghost authoring and ghostwriting stems from  
4 differences of opinion in the medical literature over how authorship is defined, particularly  
5 with regard to what constitutes “substantial” contributions to a publication and the role of  
6 disclosure of contributions to a manuscript in the acknowledgments.[69] The ICMJE criteria  
7 for authorship[12] are the most well recognised authorship criteria available, but leave much  
8 about authorship undefined.[63, 70] Despite this, the recent emphasis on author  
9 accountability in the ICMJE’s fourth criterion is an attempt to better define authors as those  
10 persons who are responsible and accountable for the content of a published work. While a  
11 professional medical writer can take responsibility for the writing and how research is  
12 reported in a manuscript, the professional medical writer cannot take responsibility for the  
13 integrity of the research or be accountable for the clinical interpretation of the findings,  
14 unless he or she was involved in the generation of the research or its analysis.  
15 Responsibility for the integrity of research and accountability for the clinical interpretation of  
16 the findings is, and should always be, the responsibility of the authors. Until a more  
17 definitive model of authorship is universally accepted, the controversy and disagreement  
18 over definitions of authors, ghostwriters, and ghost authors will remain. However, no matter  
19 what term is used, the practice of misleading readers about potential competing interests  
20 and hiding contributions to a published work, no matter whether these contributions should  
21 be most appropriately disclosed in the author byline or acknowledgements section, is  
22 unethical and totally unacceptable.  
23  
24  
25  
26  
27  
28  
29  
30  
31  
32  
33  
34  
35  
36  
37  
38  
39  
40  
41  
42  
43  
44

45 The strengths of this systematic review are that a broad search strategy was employed with  
46 few restrictions to minimize any potential for publication or language bias. All study designs  
47 and publication types were considered and there were no restrictions on language. Although  
48 the full text or abstracts of 8 publications could not be retrieved, omission of these  
49 publications was unlikely to have biased the findings. Review of the abstracts or titles of  
50 these publications suggested that none reported numerical estimates of the prevalence of  
51 ghostwriting. The major finding of this review was the limitations of the reported evidence of  
52  
53  
54  
55  
56  
57  
58  
59

1  
2  
3 ghostwriting in the medical literature. These limitations included the heterogeneity among the  
4 studies in the outcomes reported and populations investigated, the observational study  
5 designs, and the retrospective nature of data collection. Given the nature of unethical  
6 authorship practices, it may not be feasible to conduct a prospective study on ghostwriting.  
7 However, based on the findings from this review, recommendations can be made to help  
8 researchers, authors, editors, and peer-reviewers apply the same rigorous standards that  
9 are applied to the conduct and assessment of all clinical research and actively improve the  
10 quality of reporting of the evidence of unethical authorship practices.  
11  
12  
13  
14  
15  
16  
17  
18  
19  
20

21 Researchers should use a standard definition of ghostwriting so that the confusion around  
22 ghostwriters and ghost authors is not perpetuated. ~~Ghostwriting is paid or unpaid writing  
23 assistance by individuals who generally do not merit authorship and whose contributions are  
24 not disclosed in the acknowledgments.[1] In contrast, ghost authoring is contributions to the  
25 research, data analysis, and/or writing of a manuscript by individuals who do merit  
26 authorship and whose contributions are not disclosed in the author byline.[1]~~ For example,  
27 the descriptive analysis of Danish industry-initiated trials used a nonstandard definition of  
28 authorship, which is likely to have contributed to the very high prevalence of possible  
29 ghostwriting reported in this study (75%). In this study, Gøtzsche et al.[30] suggested that  
30 individuals who write the trial protocol, conduct the statistical analyses, or who contribute to  
31 the writing of a publication should be included as authors. Indeed, the prevalence of ghost  
32 authorship in this study was 91% when the analyses included these individuals, irrespective  
33 of whether they had been appropriately acknowledged elsewhere. Given that the Gøtzsche  
34 et al.[30] study has been downloaded more than 3,000 times since publication[71] and cited  
35 repeatedly as evidence not only of ghost authorship but also of ghostwriting,[40, 44, 46, 48]  
36 it would have been illuminating if the authors had included an estimate of the prevalence of  
37 ghostwriting using standard definitions for comparison. In addition to using standard  
38 definitions of ghostwriting, researchers and authors should ensure that cited evidence of  
39 ghostwriting is reported accurately without unwarranted generalizations. Publications based  
40  
41  
42  
43  
44  
45  
46  
47  
48  
49  
50  
51  
52  
53  
54  
55  
56  
57  
58  
59  
60

1  
2  
3 on personal commentary should be avoided and studies that use nonstandard definitions,  
4  
5 specific populations, or that were conducted before a change in practice (eg, before the  
6  
7 adoption of the Good Publication Practice guidelines for communicating company sponsored  
8  
9 research in 2003 [GPP][72] and in 2009 [GPP2][11]) should be described in context.  
10

11  
12  
13 Editors and peer reviewers have a duty to prevent outdated, misleading, or mistaken  
14  
15 evidence on the prevalence of ghostwriting from being published and perpetuated. Close  
16  
17 attention should be paid to the internal and external validity of the study, the definitions used,  
18  
19 how the data are reported, and whether the data are interpreted within the context of current  
20  
21 practices. When assessing a submitted manuscript on ghostwriting, editors should consider  
22  
23 using peer reviewers with expertise in the appropriate study designs (eg, survey research)  
24  
25 and ethical publication practices. Collectively, these actions could help prevent further  
26  
27 questionable evidence on the prevalence of ghostwriting from being published.  
28  
29

30  
31 In conclusion, the findings from this systematic review showed that reports of the prevalence  
32  
33 of ghostwriting in the medical literature are limited by the varied definitions used to describe  
34  
35 unethical authorship practices, the types of study designs employed, and the populations  
36  
37 assessed. To improve reporting, researchers should not inflate estimates using nonstandard  
38  
39 definitions of ghostwriting nor conflate ghostwriting with other unethical authorship practices.  
40  
41 While open and transparent debate should be encouraged, editors and peer reviewers  
42  
43 should not accept articles that incorrectly cite or interpret primary publications that report the  
44  
45 prevalence of ghostwriting.  
46  
47  
48  
49  
50  
51  
52  
53  
54  
55  
56  
57  
58  
59  
60

## ACKNOWLEDGMENTS CONTRIBUTORSHIP STATEMENT

The author, SS, contributed to the conception and design of the systematic literature review, the collection and screening of publications, and the analysis and interpretation of the findings. SS drafted and critically revised draft versions of the manuscript and gave final approval for submission.

The author acknowledges and thanks Sericka McGee, PharmD, Hamilton House, for her contributions to the conception and design of the systematic literature review and the collection and screening of articles for inclusion. Sericka McGee contributed to an earlier version of the systematic review (search dates 1966 to May 2011), which was presented at the 8th Annual Meeting, International Society for Medical Publication Professionals, 23-25 Apr 2012 and at the 72<sup>nd</sup> Annual Conference, American Medical Writers Association, 4-6 Oct 2012, Sacramento, USA. The author thanks Professor Karen Woolley, PhD, CMPP (ProScribe- Envision Pharma Group Medical Communications) and Dr Cindy Hamilton, PharmD, ELS (Hamilton House) for their stimulating and valuable contributions to the interpretation of the findings from this study and for their critical review during the drafting of the manuscript.

## **COMPETING INTERESTS**

The author is a professional medical writer who is actively involved in national and international not-for-profit organizations that encourage ethical medical writing practices. The author has no relationships with any pharmaceutical company that might have an interest in the submitted work and has no other relationships that could be construed as a competing interest.

## **FUNDING**

1  
2  
3 The author was supported (eg, reimbursement of expenses for conference travel) by her  
4 employer, ProScribe ~~Medical Communications~~ Envision Pharma Group, for the submitted  
5  
6  
7 work. No other funding was received to conduct this research.  
8  
9

#### 10 DATA SHARING

11 All data associated with the study are fully available to the author.  
12  
13  
14  
15  
16  
17  
18  
19  
20  
21  
22  
23  
24  
25  
26  
27  
28  
29  
30  
31  
32  
33  
34  
35  
36  
37  
38  
39  
40  
41  
42  
43  
44  
45  
46  
47  
48  
49  
50  
51  
52  
53  
54  
55  
56  
57  
58  
59  
60

## REFERENCES

1. Woolley KL, Gertel A, Hamilton CW, *et al*. Time to finger point or fix? An invitation to join ongoing efforts to promote ethical authorship and other good publication practices. *Ann Pharmacother* 2013;**47**:1084-7.
2. Scott-Lichter D and the Editorial Policy Committee of the Council of Science Editors. CSE's White Paper on Promoting Integrity in Scientific Journal Publications, 2012 Update. Wheat Ridge, CO: 2012. [http://www.councilscienceeditors.org/files/public/entire\\_whitepaper.pdf](http://www.councilscienceeditors.org/files/public/entire_whitepaper.pdf) (accessed 30 December 2013).
3. Mathews AW. Ghost story: at medical journals, writers paid by industry play big role. *Wall St J (East Ed)* 2005:A1, A8.
4. Abbasi K. Editor's choice: Transparency and trust. *BMJ* 2004;**329**:0.8.
5. Collier R. Prevalence of ghostwriting spurs calls for transparency. *Can Med Assoc J* 2009;**181**:E161-2.
6. Healy D, Cattell D. Interface between authorship, industry and science in the domain of therapeutics. *Br J Psychiatry* 2003;**183**:22-7.
7. PLoS Med Editors. Ghostwriting: The dirty little secret of medical publishing that just got bigger. *PLoS Med* 2009;**6**:e1000156.
8. Ross JS, Hill KP, Egilman DS, *et al*. Guest authorship and ghostwriting in publications related to rofecoxib: A case study of industry documents from rofecoxib litigation. *JAMA* 2008;**299**:1800-12.
9. Gøtzsche PC, Kassirer JP, Woolley KL, *et al*. What should be done to tackle ghostwriting in the medical literature? *PLoS Med* 2009;**6**:e23.
10. Woolley KL, Ely JA, Woolley MJ, *et al*. Declaration of medical writing assistance in international peer-reviewed publications. *JAMA* 2006;**296**:932-4.
11. Graf C, Battisti WP, Bridges D, *et al*. Research Methods & Reporting. Good publication practice for communicating company sponsored medical research: the GPP2 guidelines. *BMJ* 2009;**339**:b4330.



- 1  
2  
3  
4  
5  
6  
7  
8  
9  
10  
11  
12  
13  
14  
15  
16  
17  
18  
19  
20  
21  
22  
23  
24  
25  
26  
27  
28  
29  
30  
31  
32  
33  
34  
35  
36  
37  
38  
39  
40  
41  
42  
43  
44  
45  
46  
47  
48  
49  
50  
51  
52  
53  
54  
55  
56  
57  
58  
59  
60
12. International Committee of Medical Journal Editors. Recommendations for the conduct, reporting, editing and publication of scholarly work in medical journals. Roles and responsibilities of authors, contributors, reviewers, editors, publishers, and owners: defining the role of authors and contributors. 2013. [http://www.icmje.org/roles\\_a.html](http://www.icmje.org/roles_a.html) (accessed 30 December 2013).
13. Nastasee S. Acknowledgement of medical writers in medical journal articles: a comparison from the years 2000 and 2007. *AMWA J* 2010;**25**:2-6.
14. World Association of Medical Editors. Policy Statement: Ghost writing initiated by commercial companies, Revised 15 June 2005. <http://www.wame.org/resources/policies#ghost> (accessed 30 December 2013).
15. Editors. Ghost writers in the sky. *J Urol* 2008;**179**:809-10.
16. Woolley KL. Goodbye Ghostwriters!: How to work ethically and efficiently with professional medical writers. *Chest* 2006;**130**:921-3.
17. Jacobs A, Wager E. European Medical Writers Association (EMWA) guidelines on the role of medical writers in developing peer-reviewed publications. *Curr Med Res Opin* 2005;**21**:317-22.
18. Hamilton C. AMWA position statement on the contributions of medical writers to scientific publications. *AMWA J* 2003;**18**:13-6.
19. Bennett C, Khangura S, Brehaut J, *et al*. Reporting guidelines for survey research: an analysis of published guidance and reporting practices. *PLoS Med* 2011;**8**:e1001069.
20. Wislar JS, Flanagan A, Fontanarosa PB, *et al*. Honorary and ghost authorship in high impact biomedical journals: a cross sectional survey. *BMJ* 2011;**343**:d6128.
21. Vinther S, Rosenberg J. Appearance of ghost and gift authors in Ugeskrift for Laeger and Danish Medical Journal. *Dan Med J* 2012;**59**:1-6.
22. Price J, Dake J, Oden L. Authorship of health education articles: Guests, ghosts and trends. *Am J Health Behavior* 2000;**24**:290-9.
23. Mowatt G, Shirran L, Grimshaw JM, *et al*. Prevalence of honorary and ghost authorship in Cochrane reviews. *JAMA* 2002;**287**:2769-71.

- 1  
2  
3  
4  
5  
6  
7  
8  
9  
10  
11  
12  
13  
14  
15  
16  
17  
18  
19  
20  
21  
22  
23  
24  
25  
26  
27  
28  
29  
30  
31  
32  
33  
34  
35  
36  
37  
38  
39  
40  
41  
42  
43  
44  
45  
46  
47  
48  
49  
50  
51  
52  
53  
54  
55  
56  
57  
58  
59  
60
24. Mirzazadeh A, Navadeh S, Rokni M, *et al*. The prevalence of honorary and ghost authorships in Iranian bio-medical journals and its associated factors. *Iran J Public Health* 2011;**40**:15-21.
25. Jacobs A, Hamilton C. Decreased evidence of ghostwriting in a 2008 vs 2005 survey of medical writers. *Write Stuff* 2009;**18**:118-23.
26. Ghajarzadeh M. Guest authors in an Iranian journal. *Dev World Bioeth*. Published Online First: 1 Oct 2012. doi: 10.1111/dewb.12002.
27. Flanagan A, Carey LA, Fontanarosa PB, *et al*. Prevalence of articles with honorary authors and ghost authors in peer- reviewed medical journals. *JAMA* 1998;**280**:222-4.
28. Dotson B, Slaughter RL. Prevalence of articles with honorary and ghost authors in three pharmacy journals. *Am J Health Syst Pharm* 2011;**68**:1730-4.
29. Suda KJ, Hurley AM, McKibbin T, *et al*. Publication of noninferiority clinical trials: Changes over a 20-year interval. *Pharmacotherapy* 2011;**31**:833-9.
30. Gøtzsche PC, Hróbjartsson A, Johansen HK, *et al*. Ghost authorship in industry-initiated randomised trials. *PLoS Med* 2007;**4**:0047-52.
31. Rees T, Kelly M, Smith S. How much do healthcare professionals know about GPP authorship criteria? *Curr Med Res Opin* 2013;**29**:S18-S9.
32. Hao X, Qian S, You S, *et al*. Ghost writers and honorary authorship: a survey from the Chinese Medical Journal [abstract]. *Sixth International Congress on Peer Review and Biomedical Publication; 2009 Sept 10-12; Vancouver, BC, Canada* 2009.
33. Hamilton CW, Jacobs A. Evidence of decreased ghostwriting in a series of three surveys of medical communicators conducted between 2005 and 2011. *AMWA J* 2012;**27**:115.
34. Elliott C. Pharma goes to the laundry: Public relations and the business of medical education. *Hastings Cent Rep* 2004;**34**:18-23.
35. Moffatt B, Elliott C. Ghost marketing: pharmaceutical companies and ghostwritten journal articles. *Perspect Biol Med* 2007;**50**:18-31.
36. Scheife RT. A ghost in the machine. *Pharmacotherapy* 2009;**29**:363-4.

- 1  
2  
3  
4  
5  
6  
7  
8  
9  
10  
11  
12  
13  
14  
15  
16  
17  
18  
19  
20  
21  
22  
23  
24  
25  
26  
27  
28  
29  
30  
31  
32  
33  
34  
35  
36  
37  
38  
39  
40  
41  
42  
43  
44  
45  
46  
47  
48  
49  
50  
51  
52  
53  
54  
55  
56  
57  
58  
59  
60
37. MacLennan A, Sturdee D, Fenton A, *et al*. Editorial: Ghost writers, vested interest and funding disclosures. *Climacteric* 2010;**13**:301-2.
38. Nahai F. Ghostwriting: Stringent disclosure policies take aim at authorship abuses. *Aesthet Surg J* 2010;**30**:265-6.
39. Ngai S, Gold JL, Gill SS, *et al*. Haunted manuscripts: ghost authorship in the medical literature. *Account Res* 2005;**12**:103-14.
40. Bosch X. Exorcising ghostwriting. Ghostwriting could potentially have serious repercussions for science and should therefore be treated as research misconduct. *EMBO Rep* 2011;**12**:489-94.
41. Wiwanitkit V. Ghostwriting: An existing problem. *Am J Med* 2012;**125**:e17.
42. Krinsky S. When conflict-of-interest is a factor in scientific misconduct. *Med Law* 2007;**26**:447-63.
43. Langdon-Neuner E. Medical ghost-writing. *Mens Sana Monogr* 2008;**6**:257-73.
44. Tharyan P. Evidence-based medicine: can the evidence be trusted? *Indian J Med Ethics* 2011;**8**:201-7.
45. Paul M. On transparency, responsibility, and accountability. *Clin Microbiol Infect* 2009;**15**:1100-2.
46. Bavdekar SB. Authorship issues. *Lung India* 2012;**29**:76-80.
47. Gorski A, Letkiewicz S. "Medical writing" and ghostwriting as ethical challenges in medical communication. *Transplant Proc* 2010;**42**:3335-7.
48. Matías-Guiu J, García-Ramos R. Ghost-authors, improvement article communication, and medical publications. *Neurologia* 2011;**26**:257-61.
49. McHenry L. Of sophists and spin-doctors: industry-sponsored ghostwriting and the crisis of academic medicine. *Mens Sana Monogr* 2010;**8**:129-45.
50. Healy DT. Transparency and trust: figure for ghost written articles was misquoted. *BMJ* 2004;**329**:1345.
51. Mitrany D. The ghostwriting controversy: Time for a proper burial. *Science Editor* 2005;**28**:187.

- 1  
2  
3  
4  
5  
6  
7  
8  
9  
10  
11  
12  
13  
14  
15  
16  
17  
18  
19  
20  
21  
22  
23  
24  
25  
26  
27  
28  
29  
30  
31  
32  
33  
34  
35  
36  
37  
38  
39  
40  
41  
42  
43  
44  
45  
46  
47  
48  
49  
50  
51  
52  
53  
54  
55  
56  
57  
58  
59  
60
52. Kmietowicz Z. Consumer organisations criticise influence of drug companies. *BMJ* 2004;**329**:937.
53. Bonita RE, Adams S, Whellan DJ. Reporting of clinical trials: publication, authorship, and trial registration. *Heart Fail Clin* 2011;**7**:561-7.
54. Anon. Ghostwriting in medical literature. *Int J Occup Environ Health* 2011;**17**:168-77.
55. Anon. High prevalence of ghost authorship in industry-initiated trials. *Nat Clin Pract Nephrol* 2007;**3**:240.
56. Baethge C. On ghost authorship and reviews: The 6th International Congress on Peer Review and Biomedical Publication. *Deutsches Arzteblatt* 2009;**106**:731-2.
57. Flanagan A. Research on authorship. What do we know about the prevalence of ghost authorship? *Council of Science Editors Annual Meeting, May 14-18, Atlanta, Georgia* 2010.
58. Murray S, Brophy J, Palepu A. Open Medicine's ghost and guest authorship policy. *Open Med* 2010;**4**:e11-2.
59. Moore N. Transparency and trust: Clear definition of ghost writing would be helpful. *BMJ* 2004;**329**:1345-6.
60. Hargreaves S. Industry funded trials often have ghost authorship. *BMJ* 2007;**334**:223.
61. Jones N. Ghosts still present in the medical machine. *Nature* 2009;**461**:325.
62. Williams M. An inquiry by the UK House of Commons Health Select Committee into the influence of the pharmaceutical industry (18 October). 2004.  
[http://www.meactionuk.org.uk/HoC\\_Select\\_Ctte\\_Inquiry\\_into\\_Pharma.htm](http://www.meactionuk.org.uk/HoC_Select_Ctte_Inquiry_into_Pharma.htm) (accessed 30 December 2013).
63. Marušić A, Bošnjak L, Jerončić A. A systematic review of research on the meaning, ethics and practices of authorship across scholarly disciplines. *PLoS One* 2011;**6**:e23477.
64. Bailey M. Science editing and its effect on manuscript acceptance time. *AMWA J* 2011;**26**:147-52.
65. Jacobs A. Adherence to the CONSORT guideline in papers written by professional medical writers. *Write Stuff* 2010;**19**:196-200.

- 1  
2  
3  
4  
5  
6  
7  
8  
9  
10  
11  
12  
13  
14  
15  
16  
17  
18  
19  
20  
21  
22  
23  
24  
25  
26  
27  
28  
29  
30  
31  
32  
33  
34  
35  
36  
37  
38  
39  
40  
41  
42  
43  
44  
45  
46  
47  
48  
49  
50  
51  
52  
53  
54  
55  
56  
57  
58  
59  
60
66. Woolley KL, Lew RA, Stretton S, *et al*. Lack of involvement of medical writers and the pharmaceutical industry in publications retracted for misconduct: a systematic, controlled, retrospective study. *Curr Med Res Opin* 2011;**27**:1175-82.
67. Flanagin A, Carey LA, Fontanarosa PB, *et al*. Prevalence of articles with honorary authors and ghost authors in peer-reviewed medical journals. *JAMA* 1998;**280**:222-4.
68. Wislar JS, Flanagin A, Fontanarosa PB, *et al*. Honorary and ghost authorship in high impact biomedical journals: a cross sectional survey. *BMJ* 2011;**343**:d6128.
69. Leo L, Lacasse J. Medical ghostwriting: A university sanctioned sleight of hand? *Society* 2012;**49**:310-2.
70. Malički M, Jerončić A, Marušić M, *et al*. Why do you think you should be the author on this manuscript? Analysis of open-ended responses of authors in a general medical journal. *BMC Med Res Methodol* 2012;**12**:189.
71. PLoS Med. Article metrics: Ghost authorship in industry-initiated randomised trials: PLoS Med, 2013.
72. Wager E, Field EA, Grossman L. Good publication practice for pharmaceutical companies. *Curr Med Res Opin* 2003;**19**:149-54.

## FIGURE LEGENDS

**Figure 1. Selection of publications reporting a numerical estimate of the prevalence of ghostwriting.** Electronic databases were searched on 23 May 2013.

<sup>a</sup> Journal of the European Medical Writers Association, formerly known as The Write Stuff.

<sup>b</sup> Journal of the American Medical Writers Association.

<sup>c</sup> Council of Science Editors Annual Meetings.

<sup>d</sup> International Congress on Peer Review and Biomedical Publication.

**Figure 2. Case study of original versus cited evidence of ghostwriting prevalence.**

Contrast between original evidence on the prevalence of possible ghostwriting in sertraline publications from 1998 to 2000 and the subsequent citations of this evidence. Source of the original published evidence: Healy and Cattell[6] showed that 55 of 96 (57%) articles published on sertraline from 1998 to 2000 were coordinated through a medical communications company and concluded that these data provided information on the “possible extent of ghostwriting based on a single drug”. Inaccurate reporting from the cited source is marked with a cross.

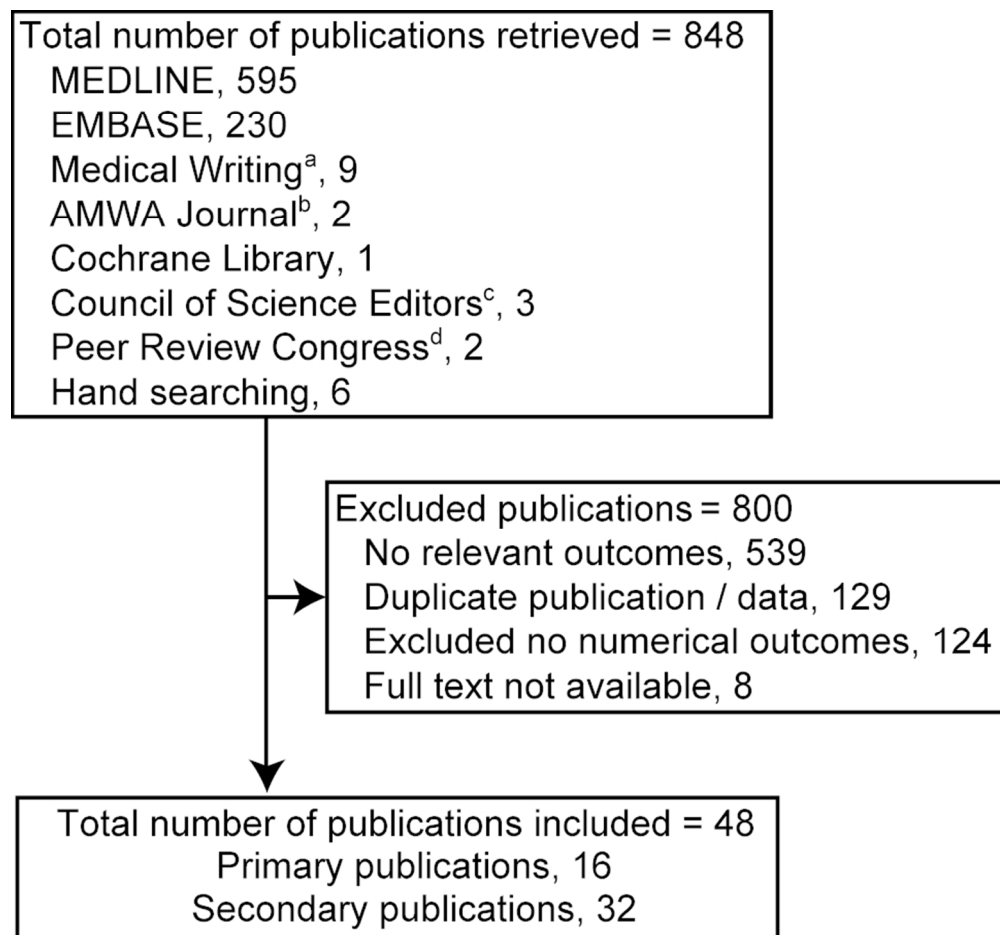

Figure 1. Selection of publications reporting a numerical estimate of the prevalence of ghostwriting.

Electronic databases were searched on 23 May 2013.

a Journal of the European Medical Writers Association, formerly known as The Write Stuff.

b Journal of the American Medical Writers Association.

c Council of Science Editors Annual Meetings.

d International Congress on Peer Review and Biomedical Publication.

82x76mm (300 x 300 DPI)

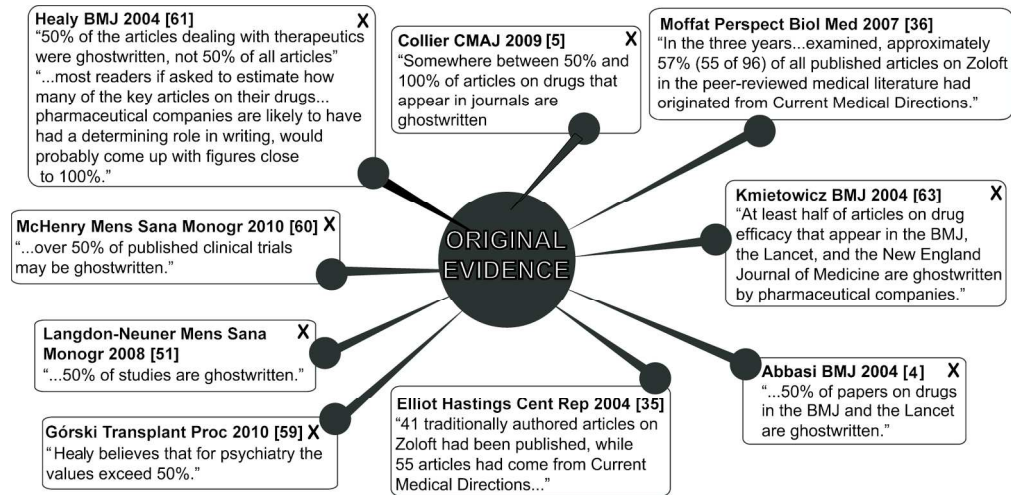

Figure 2. Case study of original versus cited evidence of ghostwriting prevalence. Contrast between original evidence on the prevalence of possible ghostwriting in sertraline publications from 1998 to 2000 and the subsequent citations of this evidence. Source of the original published evidence: Healy and Cattell[6] showed that 55 of 96 (57%) articles published on sertraline from 1998 to 2000 were coordinated through a medical communications company and concluded that these data provided information on the "possible extent of ghostwriting based on a single drug". Inaccurate reporting from the cited source is marked with a cross.

170x83mm (300 x 300 DPI)





# PRISMA 2009 Checklist

1  
2  
3  
4  
5  
6  
7  
8  
9  
10  
11  
12  
13  
14  
15  
16  
17  
18  
19  
20  
21  
22  
23  
24  
25  
26  
27  
28  
29  
30  
31  
32  
33  
34  
35  
36  
37  
38  
39  
40  
41  
42  
43  
44  
45  
46  
47  
48  
49

| Section/topic             | #  | Checklist item                                                                                                                                                                                                                                                                                              | Reported on page #                                                                                                                                                                                                                                                                                 |
|---------------------------|----|-------------------------------------------------------------------------------------------------------------------------------------------------------------------------------------------------------------------------------------------------------------------------------------------------------------|----------------------------------------------------------------------------------------------------------------------------------------------------------------------------------------------------------------------------------------------------------------------------------------------------|
| <b>TITLE</b>              |    |                                                                                                                                                                                                                                                                                                             |                                                                                                                                                                                                                                                                                                    |
| Title                     | 1  | Identify the report as a systematic review, meta-analysis, or both.                                                                                                                                                                                                                                         | p. 1                                                                                                                                                                                                                                                                                               |
| <b>ABSTRACT</b>           |    |                                                                                                                                                                                                                                                                                                             |                                                                                                                                                                                                                                                                                                    |
| Structured summary        | 2  | Provide a structured summary including, as applicable: background; objectives; data sources; study eligibility criteria, participants, and interventions; study appraisal and synthesis methods; results; limitations; conclusions and implications of key findings; systematic review registration number. | pp. 2/3                                                                                                                                                                                                                                                                                            |
| <b>INTRODUCTION</b>       |    |                                                                                                                                                                                                                                                                                                             |                                                                                                                                                                                                                                                                                                    |
| Rationale                 | 3  | Describe the rationale for the review in the context of what is already known.                                                                                                                                                                                                                              | p. 5                                                                                                                                                                                                                                                                                               |
| Objectives                | 4  | Provide an explicit statement of questions being addressed with reference to participants, interventions, comparisons, outcomes, and study design (PICOS).                                                                                                                                                  | p. 6                                                                                                                                                                                                                                                                                               |
| <b>METHODS</b>            |    |                                                                                                                                                                                                                                                                                                             |                                                                                                                                                                                                                                                                                                    |
| Protocol and registration | 5  | Indicate if a review protocol exists, if and where it can be accessed (e.g., Web address), and, if available, provide registration information including registration number.                                                                                                                               | A review protocol was prepared that prespecified the primary and secondary objectives of the literature review, eligibility criteria, data to be collected, and primary and secondary outcome measures. The review protocol was not registered in a public registry but is available upon request. |
| Eligibility criteria      | 6  | Specify study characteristics (e.g., PICOS, length of follow-up) and report characteristics (e.g., years considered, language, publication status) used as criteria for eligibility, giving rationale.                                                                                                      | p. 7                                                                                                                                                                                                                                                                                               |
| Information sources       | 7  | Describe all information sources (e.g., databases with dates of coverage, contact with study authors to identify additional studies) in the search and date last searched.                                                                                                                                  | p. 6                                                                                                                                                                                                                                                                                               |
| Search                    | 8  | Present full electronic search strategy for at least one database, including any limits used, such that it could be repeated.                                                                                                                                                                               | p. 6                                                                                                                                                                                                                                                                                               |
| Study selection           | 9  | State the process for selecting studies (i.e., screening, eligibility, included in systematic review, and, if applicable, included in the meta-analysis).                                                                                                                                                   | pp. 6/7                                                                                                                                                                                                                                                                                            |
| Data collection process   | 10 | Describe method of data extraction from reports (e.g., piloted forms, independently, in duplicate) and any processes for obtaining and confirming data from investigators.                                                                                                                                  | p. 7                                                                                                                                                                                                                                                                                               |

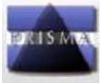

# PRISMA 2009 Checklist

1  
2  
3  
4  
5  
6  
7  
8  
9  
10  
11  
12  
13  
14  
15  
16  
17  
18  
19  
20  
21  
22  
23  
24  
25  
26  
27  
28  
29  
30  
31  
32  
33  
34  
35  
36  
37  
38  
39  
40  
41  
42  
43  
44  
45  
46  
47  
48  
49

|                                    |    |                                                                                                                                                                                                                        |                                                                                                                                                                                                                                                                                                                                                                                                                                                                                                                               |
|------------------------------------|----|------------------------------------------------------------------------------------------------------------------------------------------------------------------------------------------------------------------------|-------------------------------------------------------------------------------------------------------------------------------------------------------------------------------------------------------------------------------------------------------------------------------------------------------------------------------------------------------------------------------------------------------------------------------------------------------------------------------------------------------------------------------|
| Data items                         | 11 | List and define all variables for which data were sought (e.g., PICOS, funding sources) and any assumptions and simplifications made.                                                                                  | p. 7                                                                                                                                                                                                                                                                                                                                                                                                                                                                                                                          |
| Risk of bias in individual studies | 12 | Describe methods used for assessing risk of bias of individual studies (including specification of whether this was done at the study or outcome level), and how this information is to be used in any data synthesis. | Risk of bias was not conducted formally because data were not synthesised and because of the various study types retrieved. Given the various study designs and methods used across the retrieved studies, the quality of the study methods were assessed on a study-by-study basis. The key factors considered were the study design, definition of ghostwriting used, and study population. The factors considered when determining the quality of the cross-sectional surveys are described in the Methods section (p. 7). |
| Summary measures                   | 13 | State the principal summary measures (e.g., risk ratio, difference in means).                                                                                                                                          | Not applicable because study data were not synthesised                                                                                                                                                                                                                                                                                                                                                                                                                                                                        |
| Synthesis of results               | 14 | Describe the methods of handling data and combining results of studies, if done, including measures of consistency (e.g., $I^2$ ) for each meta-analysis.                                                              | Not applicable because study data were not synthesised.                                                                                                                                                                                                                                                                                                                                                                                                                                                                       |

Page 1 of 2

| Section/topic               | #  | Checklist item                                                                                                                                                  | Reported on page #                                                                                                                                                                                                                         |
|-----------------------------|----|-----------------------------------------------------------------------------------------------------------------------------------------------------------------|--------------------------------------------------------------------------------------------------------------------------------------------------------------------------------------------------------------------------------------------|
| Risk of bias across studies | 15 | Specify any assessment of risk of bias that may affect the cumulative evidence (e.g., publication bias, selective reporting within studies).                    | Risk of bias across studies was not conducted formally because data were not synthesised and because of the considerable variation in study designs, populations, and definitions of ghostwriting used in the retrieved publications.      |
| Additional analyses         | 16 | Describe methods of additional analyses (e.g., sensitivity or subgroup analyses, meta-regression), if done, indicating which were pre-specified.                | No additional analyses were conducted                                                                                                                                                                                                      |
| <b>RESULTS</b>              |    |                                                                                                                                                                 |                                                                                                                                                                                                                                            |
| Study selection             | 17 | Give numbers of studies screened, assessed for eligibility, and included in the review, with reasons for exclusions at each stage, ideally with a flow diagram. | 8, Figure 1                                                                                                                                                                                                                                |
| Study characteristics       | 18 | For each study, present characteristics for which data were extracted (e.g., study size, PICOS, follow-up period) and provide the citations.                    | 8-11, 15, Tables 1-3                                                                                                                                                                                                                       |
| Risk of bias within studies | 19 | Present data on risk of bias of each study and, if available, any outcome level assessment (see item 12).                                                       | Risk of bias was not conducted formally because data were not synthesised. All studies retrieved were limited by the observational nature of the data collection. The quality of individual components of each study are listed in Table 1 |



# PRISMA 2009 Checklist

1  
2  
3  
4  
5  
6  
7  
8  
9  
10  
11  
12  
13  
14  
15  
16  
17  
18  
19  
20  
21  
22  
23  
24  
25  
26  
27  
28  
29  
30  
31  
32  
33  
34  
35  
36  
37  
38  
39  
40  
41  
42  
43  
44  
45  
46  
47  
48  
49

|                               |    |                                                                                                                                                                                                          |                                                                                                                                                                                                     |
|-------------------------------|----|----------------------------------------------------------------------------------------------------------------------------------------------------------------------------------------------------------|-----------------------------------------------------------------------------------------------------------------------------------------------------------------------------------------------------|
|                               |    |                                                                                                                                                                                                          | and are summarised in the results section (Publication Characteristics) (pp. 8/9).                                                                                                                  |
| Results of individual studies | 20 | For all outcomes considered (benefits or harms), present, for each study: (a) simple summary data for each intervention group (b) effect estimates and confidence intervals, ideally with a forest plot. | Tables 1-3                                                                                                                                                                                          |
| Synthesis of results          | 21 | Present results of each meta-analysis done, including confidence intervals and measures of consistency.                                                                                                  | Not applicable because study data were not synthesised                                                                                                                                              |
| Risk of bias across studies   | 22 | Present results of any assessment of risk of bias across studies (see Item 15).                                                                                                                          | Not applicable because study data were not synthesised and because of the considerable variation in study designs, populations, and definitions of ghostwriting used in the retrieved publications. |
| Additional analysis           | 23 | Give results of additional analyses, if done (e.g., sensitivity or subgroup analyses, meta-regression [see Item 16]).                                                                                    | No additional analyses were conducted                                                                                                                                                               |
| <b>DISCUSSION</b>             |    |                                                                                                                                                                                                          |                                                                                                                                                                                                     |
| Summary of evidence           | 24 | Summarize the main findings including the strength of evidence for each main outcome; consider their relevance to key groups (e.g., healthcare providers, users, and policy makers).                     | 20-24                                                                                                                                                                                               |
| Limitations                   | 25 | Discuss limitations at study and outcome level (e.g., risk of bias), and at review-level (e.g., incomplete retrieval of identified research, reporting bias).                                            | 20-22                                                                                                                                                                                               |
| Conclusions                   | 26 | Provide a general interpretation of the results in the context of other evidence, and implications for future research.                                                                                  | 22-24                                                                                                                                                                                               |
| <b>FUNDING</b>                |    |                                                                                                                                                                                                          |                                                                                                                                                                                                     |
| Funding                       | 27 | Describe sources of funding for the systematic review and other support (e.g., supply of data); role of funders for the systematic review.                                                               | No funding was received to conduct this study                                                                                                                                                       |

From: Moher D, Liberati A, Tetzlaff J, Altman DG, The PRISMA Group (2009). Preferred Reporting Items for Systematic Reviews and Meta-Analyses: The PRISMA Statement. PLoS Med 6(6): e1000097. doi:10.1371/journal.pmed1000097

For more information, visit: [www.prisma-statement.org](http://www.prisma-statement.org).
